# Supplementary material for: Cooperative palladium-catalyzed P(NEt2)3-mediated (4 + 1) annulation of isatins with 2 hydroxymethylallylcarbonates
Source: Royal Society of Chemistry journal article supplement (doi:10.1039/d2qo00231k), 2022-01-01

# Cooperative Palladium-Catalyzed and P(NEt<sub>2</sub>)<sub>3</sub>-Mediated (4+1) Annulation of Isatins with 2-Hydroxymethylallylcarbonates

Zhipeng Zhang,<sup>‡</sup> Li Jing,<sup>‡</sup> Er-Qing Li,<sup>\*</sup> and Zheng Duan<sup>\*</sup>

College of Chemistry, Green Catalysis Center, International Phosphorus Laboratory, International Joint Research Laboratory for Functional Organophosphorus Materials of Henan Province, Zhengzhou University, Zhengzhou 450001, P. R. China  
E-mail: lierqing@zzu.edu.cn, duanzheng@zzu.edu.cn.

## Table of contents

|                                                                             |    |
|-----------------------------------------------------------------------------|----|
| 1. General experimental details.....                                        | 2  |
| 2. General procedure for reactions.....                                     | 2  |
| 3. Transformations of products <b>3ea</b> , <b>3ga</b> and <b>3la</b> ..... | 22 |
| 4. Screening asymmetric reaction conditions.....                            | 25 |
| 5. Reference.....                                                           | 30 |
| 6. X-Ray single crystal data of product <b>3i</b> .....                     | 30 |
| 7. Copies of <sup>1</sup> H NMR, <sup>13</sup> C NMR spectra.....           | 33 |

## 1. General experimental details.

All reactions were performed under nitrogen using solvents dried by standard methods. NMR spectra were obtained using Bruker AV300 spectrometer. Chemical shifts are expressed in parts per million (ppm) downfield from internal TMS. HRMS spectra were obtained on an Agilent 1290-6540 UHPLC Q-ToF HR-MS spectrometer. X-ray crystallographic analyses were performed on an Oxford diffraction Gemini Ediffractometer. Melting Point: heating rate: 4°C/min, the thermometer was not corrected. Enantiomer excesses were determined by chiral HPLC analysis on AD-H in comparison with the authentic racemates. Chiral HPLC analysis recorded on Shanghaiyice instruments and Equipment Co. Ltd. and Shimadzu LC-20A. Silica gel (200-300 mesh) was used for the chromatographic separations. All commercially available reagents were used without further purification. N-substituted isatins<sup>[1]</sup> **1** and allyl carbonates<sup>[2]</sup> **2** were synthesized according to previous procedures.

## 2. General procedure for reactions

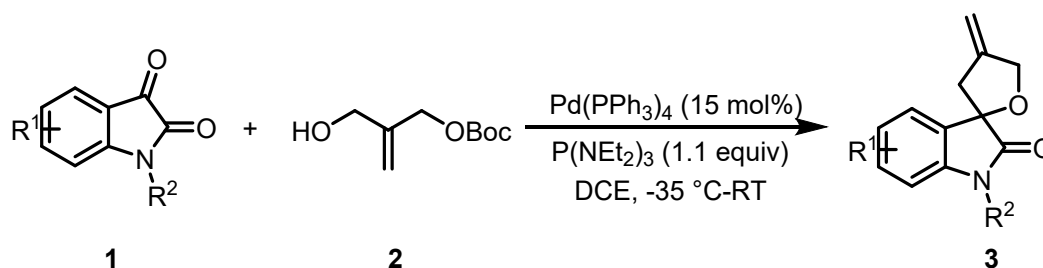

To a dry flask filled with nitrogen were added **1** (0.10 mmol) and **2** (0.20 mmol) in 2 mL DCE, Pd(PPh<sub>3</sub>)<sub>4</sub> (0.015 mmol) was next added. The mixture was cooled to -35 °C, and then a solution of P(NEt<sub>2</sub>)<sub>3</sub> (0.11 mmol, 30.0 uL) was added dropwise by a syringe. Upon the complete addition of P(NEt<sub>2</sub>)<sub>3</sub>, the resulting solution was allowed to warm to room temperature. This solution was stirred at r.t. until the complete consumption of the starting material as monitored by TLC. After the removal of the solvent, the residue was subjected to chromatography on a silica gel (60 - 120 mesh) column (eluant: petroleum ether / EtOAc = 6:1) to afford **3**.

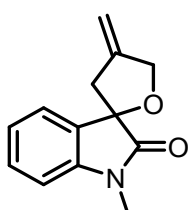

### 1'-Methyl-4-methylene-4,5-dihydro-3H-spiro[furan-2,3'-indolin]-2'-one **3a**

The reaction was conducted on a 0.10 mmol scale according to the general procedures (reaction time: 2.5 h) and afforded **3a** (20.2 mg, 94% yield).

Colorless oil.  $^1\text{H NMR}$  (300 MHz,  $\text{CDCl}_3$ )  $\delta$  7.35 - 7.30 (m, 2H), 7.07 (t,  $J = 7.4$  Hz, 1H), 6.82 (d,  $J = 8.0$  Hz, 1H), 5.18 - 5.13 (m, 2H), 4.90 (d,  $J = 12.6$  Hz, 1H), 4.69 (dd,  $J = 12.5, 1.2$  Hz, 1H), 3.18 (s, 3H), 3.04 (d,  $J = 15.8$  Hz, 1H), 2.80 (dd,  $J = 15.8, 1.5$  Hz, 1H) ppm.  $^{13}\text{C NMR}$  (75 MHz,  $\text{CDCl}_3$ )  $\delta$  176.4, 146.0, 143.6, 130.0, 129.5, 123.6, 123.1, 108.4, 105.9, 82.7, 72.1, 41.2, 26.1 ppm. **HRMS** (ESI)  $m/z$ :  $[\text{M}+\text{H}]^+$  calcd for  $\text{C}_{13}\text{H}_{14}\text{NO}_2$ : 216.1019; Found: 216.1057.

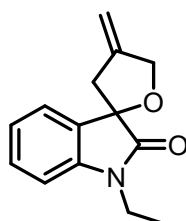

### 1'-Ethyl-4-methylene-4,5-dihydro-3H-spiro[furan-2,3'-indolin]-2'-one **3b**

The reaction was conducted on a 0.10 mmol scale according to the general procedures (reaction time: 3 h) and afforded **3b** (18.2 mg, 85% yield).

Light-pink oil.  $^1\text{H NMR}$  (300 MHz,  $\text{CDCl}_3$ )  $\delta$  7.33 - 7.27 (m, 2H), 7.04 (t,  $J = 7.5$  Hz, 1H), 6.83 (d,  $J = 7.7$  Hz, 1H), 5.18 - 5.10 (m, 2H), 4.89 (d,  $J = 12.6$  Hz, 1H), 4.67 (dd,  $J = 12.6, 1.6$  Hz, 1H), 3.71 (q,  $J = 7.2$  Hz, 2H), 3.03 (d,  $J = 15.8$  Hz, 1H), 2.78 (dd,  $J = 15.8, 1.7$  Hz, 1H), 1.24 (t,  $J = 7.2$  Hz, 3H) ppm.  $^{13}\text{C NMR}$  (75 MHz,  $\text{CDCl}_3$ )  $\delta$  176.0, 146.0, 142.7, 129.9, 129.8, 123.8, 122.9, 108.5, 105.9, 82.7, 72.1, 41.2, 34.6, 12.6 ppm. **HRMS** (ESI)  $m/z$ :  $[\text{M}+\text{H}]^+$  calcd for  $\text{C}_{14}\text{H}_{16}\text{NO}_2$ : 230.1176; Found: 230.1193.

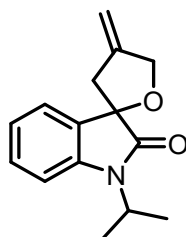

### 1'-Isopropyl-4-methylene-4,5-dihydro-3H-spiro[furan-2,3'-indolin]-2'-one **3c**

The reaction was conducted on a 0.10 mmol scale according to the general procedures (reaction time: 3 h) and afforded **3c** (19.4 mg, 80% yield).

Yellow oil.  $^1\text{H NMR}$  (300 MHz,  $\text{CDCl}_3$ )  $\delta$  7.35 - 7.31 (m, 1H), 7.29 - 7.26 (m, 1H), 7.07 - 7.01 (m, 1H), 6.97 (d,  $J = 7.9$  Hz, 1H), 5.18 - 5.11 (m, 2H), 4.90 (d,  $J = 12.6$  Hz, 1H), 4.68 (dd,  $J = 12.6, 1.6$  Hz, 1H), 4.60 - 4.51 (m, 1H), 3.03 (d,  $J = 15.7$  Hz, 1H), 2.78 (dd,  $J = 15.8, 1.9$  Hz, 1H), 1.49 (s, 3H), 1.47 (s, 3H) ppm.  $^{13}\text{C NMR}$  (75 MHz,  $\text{CDCl}_3$ )  $\delta$  176.2, 146.2, 142.3, 130.0, 129.6, 124.0, 122.5, 110.0, 105.8, 82.5,

72.1, 43.8, 41.3, 19.4, 19.2 ppm. **HRMS** (ESI)  $m/z$ :  $[M+H]^+$  calcd for  $C_{15}H_{18}NO_2$ : 244.1332; Found: 244.1381.

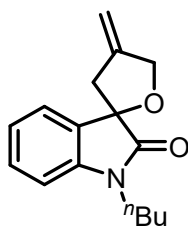

### 1'-Butyl-4-methylene-4,5-dihydro-3H-spiro[furan-2,3'-indolin]-2'-one **3d**

The reaction was conducted on a 0.10 mmol scale according to the general procedures (reaction time: 3 h) and afforded **3d** (25.5mg, > 99% yield).

Yellow oil.  **$^1H$  NMR** (300 MHz,  $CDCl_3$ )  $\delta$  7.34 - 7.28 (m, 2H), 7.05 (t,  $J = 7.5$  Hz, 1H), 6.83 (d,  $J = 7.7$  Hz, 1H), 5.18 - 5.12 (m, 2H), 4.90 (d,  $J = 12.6$  Hz, 1H), 4.69 (dd,  $J = 12.6, 1.4$  Hz, 1H), 3.67 (t,  $J = 7.2$  Hz, 2H), 3.04 (d,  $J = 15.7$  Hz, 1H), 2.79 (dd,  $J = 15.8, 1.6$  Hz, 1H), 1.71 - 1.61 (m, 2H), 1.45 - 1.33 (m, 2H), 0.95 (t,  $J = 7.3$  Hz, 3H) ppm.  **$^{13}C$  NMR** (75 MHz,  $CDCl_3$ )  $\delta$  176.3, 146.1, 143.1, 129.8, 129.7, 123.8, 122.8, 108.6, 105.8, 82.6, 72.1, 41.2, 39.6, 29.4, 20.1, 13.7 ppm. **HRMS** (ESI)  $m/z$ :  $[M+H]^+$  calcd for  $C_{16}H_{20}NO_2$ : 258.1489; Found: 258.1530.

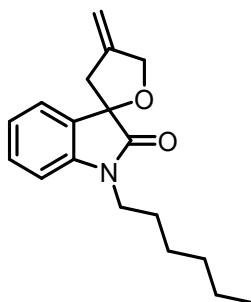

### 1'-Hexyl-4-methylene-4,5-dihydro-3H-spiro[furan-2,3'-indolin]-2'-one **3e**

The reaction was conducted on a 0.10 mmol scale according to the general procedures (reaction time: 5 h) and afforded **3e** (24.4 mg, 85% yield).

Yellow oil.  **$^1H$  NMR** (300 MHz,  $CDCl_3$ )  $\delta$  7.34 - 7.28 (m, 2H), 7.05 (t,  $J = 7.4$  Hz, 1H), 6.82 (d,  $J = 7.7$  Hz, 1H), 5.19 - 5.12 (m, 2H), 4.90 (d,  $J = 12.6$  Hz, 1H), 4.69 (dd,  $J = 12.7, 1.6$  Hz, 1H), 3.66 (t,  $J = 7.3$  Hz, 2H), 3.04 (d,  $J = 15.8$  Hz, 1H), 2.79 (dd,  $J = 15.8, 1.8$  Hz, 1H), 1.72 - 1.62 (m, 2H), 1.44 - 1.27 (m, 6H), 0.89 (t,  $J = 6.7$  Hz, 3H) ppm.  **$^{13}C$  NMR** (75 MHz,  $CDCl_3$ )  $\delta$  176.3, 146.1, 143.1, 129.8, 129.7, 123.8, 122.8, 108.6, 105.8, 82.6, 72.1, 41.2, 39.9, 31.4, 27.2, 26.5, 22.5, 14.0 ppm. **HRMS** (ESI)  $m/z$ :  $[M+H]^+$  calcd for  $C_{18}H_{24}NO_2$ : 286.1802; Found: 286.1771.

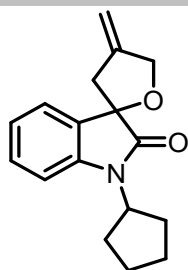

### 1'-Cyclopentyl-4-methylene-4,5-dihydro-3H-spiro[furan-2,3'-indolin]-2'-one **3f**

The reaction was conducted on a 0.10 mmol scale according to the general procedures (reaction time: 1.5 h) and afforded **3f** (23.3 mg, 87% yield).

Yellow oil.  $^1\text{H NMR}$  (300 MHz,  $\text{CDCl}_3$ )  $\delta$  7.34 (d,  $J = 7.4$  Hz, 1H), 7.29 (td,  $J = 7.9, 1.3$  Hz, 1H), 7.05 (t,  $J = 7.4$  Hz, 1H), 6.91 (d,  $J = 7.9$  Hz, 1H), 5.19 - 5.11 (m, 2H), 4.90 (d,  $J = 12.6$  Hz, 1H), 4.77 - 4.66 (m, 2H), 3.04 (d,  $J = 15.8$  Hz, 1H), 2.78 (dd,  $J = 15.8, 1.8$  Hz, 1H), 2.13 - 2.02 (m, 2H), 2.00 - 1.88 (m, 4H), 1.74 - 1.69 (m, 2H) ppm.  $^{13}\text{C NMR}$  (75 MHz,  $\text{CDCl}_3$ )  $\delta$  176.4, 146.2, 142.2, 130.0, 129.6, 123.9, 122.6, 109.9, 105.8, 82.5, 72.1, 52.3, 41.3, 27.8, 27.4, 25.2, 25.1 ppm. **HRMS** (ESI)  $m/z$ :  $[\text{M}+\text{H}]^+$  calcd for  $\text{C}_{17}\text{H}_{20}\text{NO}_2$ : 270.1489; Found: 270.1466.

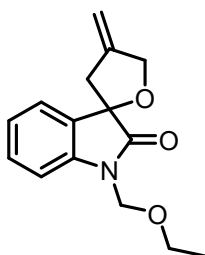

### 1'-(Ethoxymethyl)-4-methylene-4,5-dihydro-3H-spiro[furan-2,3'-indolin]-2'-one **3g**

The reaction was conducted on a 0.10 mmol scale according to the general procedures (reaction time: 3 h) and afforded **3g** (18.4 mg, 71% yield).

Light-yellow oil.  $^1\text{H NMR}$  (300 MHz,  $\text{CDCl}_3$ )  $\delta$  7.37 - 7.31 (m, 2H), 7.11 (t,  $J = 7.4$  Hz, 1H), 7.06 (d,  $J = 7.8$  Hz, 1H), 5.20 - 5.17 (m, 1H), 5.14 (d,  $J = 3.5$  Hz, 3H), 4.90 (d,  $J = 12.6$  Hz, 1H), 4.70 (dd,  $J = 12.6, 1.6$  Hz, 1H), 3.60 - 3.51 (m, 2H), 3.05 (d,  $J = 15.8$  Hz, 1H), 2.84 (dd,  $J = 15.8, 1.8$  Hz, 1H), 1.18 (t,  $J = 7.0$  Hz, 3H) ppm.  $^{13}\text{C NMR}$  (75 MHz,  $\text{CDCl}_3$ )  $\delta$  177.0, 145.8, 142.0, 130.1, 128.9, 123.8, 123.6, 110.0, 106.0, 82.9, 72.2, 69.9, 64.3, 41.4, 14.9 ppm. **HRMS** (ESI)  $m/z$ :  $[\text{M}+\text{H}]^+$  calcd for  $\text{C}_{15}\text{H}_{18}\text{NO}_3$ : 260.1281; Found: 260.1284.

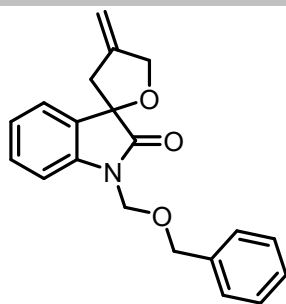

### 1'-((Benzyloxy)methyl)-4-methylene-4,5-dihydro-3H-spiro[furan-2,3'-indolin]-2'-one **3h**

The reaction was conducted on a 0.10 mmol scale according to the general procedures (reaction time: 3 h) and afforded **3h** (21.4 mg, 67% yield).

Light-pink oil.  $^1\text{H NMR}$  (300 MHz,  $\text{CDCl}_3$ )  $\delta$  7.37 - 7.30 (m, 7H), 7.15 - 7.07 (m, 2H), 5.26 (d,  $J = 11.1$  Hz, 1H), 5.22 - 5.15 (m, 3H), 4.92 (d,  $J = 12.5$  Hz, 1H), 4.72 (dd,  $J = 12.7, 1.4$  Hz, 1H), 4.57 (q,  $J = 11.8$  Hz, 2H), 3.01 (d,  $J = 15.8$  Hz, 1H), 2.81 (dd,  $J = 15.9, 1.7$  Hz, 1H) ppm.  $^{13}\text{C NMR}$  (75 MHz,  $\text{CDCl}_3$ )  $\delta$  177.0, 145.8, 141.9, 137.3, 130.1, 128.9, 128.4, 127.91, 127.87, 123.8, 123.6, 110.0, 106.0, 82.9, 72.2, 70.8, 69.8, 41.4 ppm. **HRMS** (ESI)  $m/z$ :  $[\text{M}+\text{H}]^+$  calcd for  $\text{C}_{20}\text{H}_{20}\text{NO}_3$ : 322.1438; Found: 322.1453.

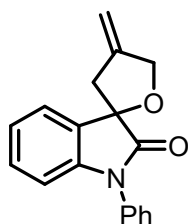

### 4-Methylene-1'-phenyl-4,5-dihydro-3H-spiro[furan-2,3'-indolin]-2'-one **3i**

The reaction was conducted on a 0.10 mmol scale according to the general procedures (reaction time: 3 h) and afforded **3i** (23.2 mg, 84% yield).

Yellow solid. **MP**: 130.5 - 132.6 °C.  $^1\text{H NMR}$  (300 MHz,  $\text{CDCl}_3$ )  $\delta$  7.53 - 7.50 (m, 2H), 7.45 - 7.38 (m, 4H), 7.27 (td,  $J = 7.6, 1.1$  Hz, 1H), 7.12 (t,  $J = 7.4$  Hz, 1H), 6.84 (d,  $J = 7.9$  Hz, 1H), 5.22 - 5.16 (m, 2H), 4.95 (d,  $J = 12.6$  Hz, 1H), 4.75 (dd,  $J = 12.6, 1.4$  Hz, 1H), 3.18 (d,  $J = 15.8$  Hz, 1H), 2.92 (dd,  $J = 15.8, 1.7$  Hz, 1H) ppm.  $^{13}\text{C NMR}$  (75 MHz,  $\text{CDCl}_3$ )  $\delta$  175.7, 145.9, 143.6, 134.1, 129.9, 129.6, 129.2, 128.1, 126.3, 124.1, 123.6, 109.7, 106.1, 82.8, 72.2, 41.6 ppm. **HRMS** (ESI)  $m/z$ :  $[\text{M}+\text{H}]^+$  calcd for  $\text{C}_{18}\text{H}_{16}\text{NO}_2$ : 278.1176; Found: 278.1218.

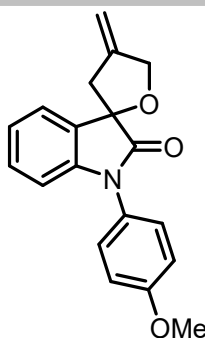

### 1'-(4-Methoxyphenyl)-4-methylene-4,5-dihydro-3H-spiro[furan-2,3'-indolin]-2'-one **3j**

The reaction was conducted on a 0.10 mmol scale according to the general procedures (reaction time: 1.5 h) and afforded **3j** (23.8 mg, 77% yield).

Yellow solid. **MP**: 129.1 - 130.8 °C. **<sup>1</sup>H NMR** (300 MHz, CDCl<sub>3</sub>)  $\delta$  7.40 (d,  $J$  = 7.4 Hz, 1H), 7.35 - 7.30 (m, 2H), 7.24 (dd,  $J$  = 7.7, 1.1 Hz, 1H), 7.10 (t,  $J$  = 7.4 Hz, 1H), 7.06 - 7.00 (m, 2H), 6.76 (d,  $J$  = 7.8 Hz, 1H), 5.22 - 5.15 (m, 2H), 4.94 (d,  $J$  = 12.6 Hz, 1H), 4.73 (dd,  $J$  = 12.6, 1.6 Hz, 1H), 3.86 (s, 3H), 3.17 (d,  $J$  = 15.8 Hz, 1H), 2.91 (dd,  $J$  = 15.8, 1.8 Hz, 1H) ppm. **<sup>13</sup>C NMR** (75 MHz, CDCl<sub>3</sub>)  $\delta$  175.9, 159.2, 146.0, 144.1, 129.9, 129.2, 127.8, 126.7, 124.0, 123.4, 114.9, 109.6, 106.0, 82.8, 72.2, 55.5, 41.5 ppm. **HRMS** (ESI)  $m/z$ : [M+H]<sup>+</sup> calcd for C<sub>19</sub>H<sub>18</sub>NO<sub>3</sub>: 308.1281; Found: 308.1327.

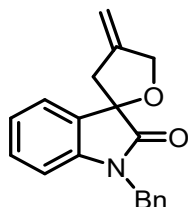

### 1'-Benzyl-4-methylene-4,5-dihydro-3H-spiro[furan-2,3'-indolin]-2'-one **3k**

The reaction was conducted on a 0.10 mmol scale according to the general procedures (reaction time: 2.5 h) and afforded **3k** (25.1 mg, 86% yield).

White solid. **MP**: 88.6 - 90.3 °C. **<sup>1</sup>H NMR** (300 MHz, CDCl<sub>3</sub>)  $\delta$  7.36 - 7.27 (m, 6H), 7.21 (td,  $J$  = 7.8, 1.1 Hz, 1H), 7.04 (t,  $J$  = 7.3 Hz, 1H), 6.70 (d,  $J$  = 7.8 Hz, 1H), 5.22 - 5.16 (m, 2H), 4.96 (d,  $J$  = 12.2 Hz, 1H), 4.88 (d,  $J$  = 2.2 Hz, 2H), 4.73 (dd,  $J$  = 12.6, 1.5 Hz, 1H), 3.12 (d,  $J$  = 15.8 Hz, 1H), 2.86 (dd,  $J$  = 15.8, 1.8 Hz, 1H) ppm. **<sup>13</sup>C NMR** (75 MHz, CDCl<sub>3</sub>)  $\delta$  176.6, 145.9, 142.7, 135.5, 129.9, 129.5, 128.8, 127.7, 127.3, 123.8, 123.1, 109.4, 106.0, 82.8, 72.2, 43.6, 41.4 ppm. **HRMS** (ESI)  $m/z$ : [M+H]<sup>+</sup> calcd for C<sub>19</sub>H<sub>18</sub>NO<sub>2</sub>: 292.1332; Found: 292.1372.

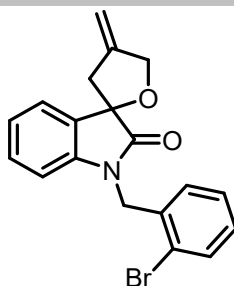

### 1'-(2-Bromobenzyl)-4-methylene-4,5-dihydro-3H-spiro[furan-2,3'-indolin]-2'-one **3l**

The reaction was conducted on a 0.10 mmol scale according to the general procedures (reaction time: 3.5 h) and afforded **3l** (21.5 mg, 58% yield).

Yellow oil.  $^1\text{H NMR}$  (300 MHz,  $\text{CDCl}_3$ )  $\delta$  7.60 (dd,  $J = 7.7, 0.9$  Hz, 1H), 7.38 (d,  $J = 7.3$  Hz, 1H), 7.25 - 7.19 (m, 2H), 7.14 (td,  $J = 7.6, 1.7$  Hz, 1H), 7.07 (t,  $J = 7.4$  Hz, 2H), 6.65 (d,  $J = 7.8$  Hz, 1H), 5.22 - 5.16 (m, 2H), 4.96 (d,  $J = 14.1$  Hz, 3H), 4.74 (dd,  $J = 12.6, 1.6$  Hz, 1H), 3.14 (d,  $J = 15.8$  Hz, 1H), 2.89 (dd,  $J = 15.8, 1.8$  Hz, 1H) ppm.  $^{13}\text{C NMR}$  (75 MHz,  $\text{CDCl}_3$ )  $\delta$  176.7, 145.8, 142.4, 134.2, 133.0, 130.0, 129.4, 129.1, 127.9, 127.8, 123.9, 123.4, 122.8, 109.5, 106.1, 82.8, 72.2, 43.6, 41.4 ppm. **HRMS** (ESI)  $m/z$ :  $[\text{M}+\text{H}]^+$  calcd for  $\text{C}_{19}\text{H}_{17}\text{BrNO}_2$ : 370.0437; Found: 370.0404.

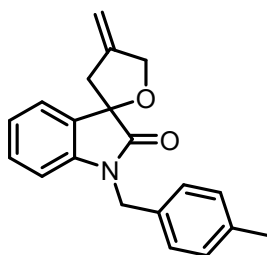

### 1'-(4-Methylbenzyl)-4-methylene-4,5-dihydro-3H-spiro[furan-2,3'-indolin]-2'-one **3m**

The reaction was conducted on a 0.10 mmol scale according to the general procedures (reaction time: 2 h) and afforded **3m** (24.5 mg, 80% yield).

Yellow oil.  $^1\text{H NMR}$  (300 MHz,  $\text{CDCl}_3$ )  $\delta$  7.34 (dd,  $J = 7.3, 0.6$  Hz, 1H), 7.23 - 7.18 (m, 3H), 7.13 (d,  $J = 8.0$  Hz, 2H), 7.06 - 7.01 (m, 1H), 6.71 (d,  $J = 7.8$  Hz, 1H), 5.21 - 5.16 (m, 2H), 4.96 (d,  $J = 12.6$  Hz, 1H), 4.84 (d,  $J = 3.8$  Hz, 2H), 4.73 (dd,  $J = 12.6, 1.5$  Hz, 1H), 3.11 (d,  $J = 15.8$  Hz, 1H), 2.85 (dd,  $J = 15.8, 1.7$  Hz, 1H), 2.32 (s, 3H) ppm.  $^{13}\text{C NMR}$  (75 MHz,  $\text{CDCl}_3$ )  $\delta$  176.6, 146.0, 142.8, 137.4, 132.5, 129.8, 129.51, 129.48, 127.3, 123.7, 123.1, 109.4, 106.0, 82.8, 72.2, 43.4, 41.4, 21.1 ppm. **HRMS** (ESI)  $m/z$ :  $[\text{M}+\text{H}]^+$  calcd for  $\text{C}_{20}\text{H}_{20}\text{NO}_2$ : 306.1489; Found: 306.1528.



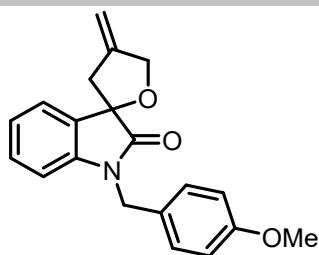

### 1'-(4-Methoxybenzyl)-4-methylene-4,5-dihydro-3H-spiro[furan-2,3'-indolin]-2'-one **3n**

The reaction was conducted on a 0.10 mmol scale according to the general procedures (reaction time: 2 h) and afforded **3n** (22.9 mg, 71% yield).

Pink oil. **<sup>1</sup>H NMR** (300 MHz, CDCl<sub>3</sub>)  $\delta$  7.33 (d,  $J$  = 7.3 Hz, 1H), 7.27 - 7.18 (m, 3H), 7.03 (t,  $J$  = 7.4 Hz, 1H), 6.85 (d,  $J$  = 8.6 Hz, 2H), 6.72 (d,  $J$  = 7.8 Hz, 1H), 5.21 - 5.15 (m, 2H), 4.95 (d,  $J$  = 12.6 Hz, 1H), 4.81 (s, 2H), 4.72 (dd,  $J$  = 12.6, 1.3 Hz, 1H), 3.78 (s, 3H), 3.10 (d,  $J$  = 15.8 Hz, 1H), 2.84 (dd,  $J$  = 15.8, 1.6 Hz, 1H) ppm. **<sup>13</sup>C NMR** (75 MHz, CDCl<sub>3</sub>)  $\delta$  176.5, 159.1, 146.0, 142.8, 129.8, 129.5, 128.7, 127.6, 123.7, 123.0, 114.2, 109.4, 106.0, 82.8, 72.2, 55.2, 43.1, 41.3 ppm. **HRMS** (ESI)  $m/z$ : [M+H]<sup>+</sup> calcd for C<sub>20</sub>H<sub>20</sub>NO<sub>3</sub>: 322.1438; Found: 322.1476.

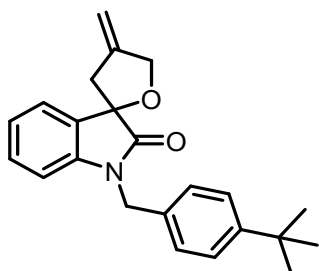

### 1'-(4-(Tert-butyl)benzyl)-4-methylene-4,5-dihydro-3H-spiro[furan-2,3'-indolin]-2'-one **3o**

The reaction was conducted on a 0.10 mmol scale according to the general procedures (reaction time: 2.5 h) and afforded **3o** (30.9 mg, 89% yield).

White solid. **MP**: 113.2 - 115.1 °C. **<sup>1</sup>H NMR** (300 MHz, CDCl<sub>3</sub>)  $\delta$  7.65 (d,  $J$  = 8.2 Hz, 3H), 7.58 - 7.50 (m, 3H), 7.35 (t,  $J$  = 7.4 Hz, 1H), 7.06 (d,  $J$  = 7.8 Hz, 1H), 5.52 - 5.46 (m, 2H), 5.26 (d,  $J$  = 12.7 Hz, 1H), 5.15 (d,  $J$  = 7.0 Hz, 2H), 5.03 (dd,  $J$  = 12.7, 1.5 Hz, 1H), 3.42 (d,  $J$  = 15.8 Hz, 1H), 3.16 (dd,  $J$  = 15.8, 1.7 Hz, 1H), 1.61 (s, 9H) ppm. **<sup>13</sup>C NMR** (75 MHz, CDCl<sub>3</sub>)  $\delta$  176.8, 150.9, 146.3, 143.2, 132.8, 130.2, 129.8, 127.4, 126.0, 124.0, 123.4, 109.7, 106.3, 83.1, 72.5, 43.6, 41.6, 34.8, 31.6 ppm. **HRMS** (ESI)  $m/z$ : [M+H]<sup>+</sup> calcd for C<sub>23</sub>H<sub>26</sub>NO<sub>2</sub>: 348.1958; Found: 348.1980.

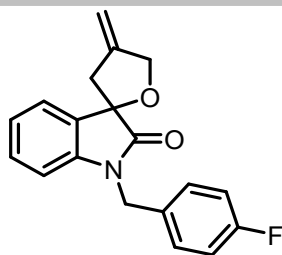

### 1'-(4-Fluorobenzyl)-4-methylene-4,5-dihydro-3H-spiro[furan-2,3'-indolin]-2'-one **3p**

The reaction was conducted on a 0.10 mmol scale according to the general procedures (reaction time: 2.5 h) and afforded **3p** (25.0 mg, 81% yield).

Light-yellow oil.  $^1\text{H NMR}$  (300 MHz,  $\text{CDCl}_3$ )  $\delta$  7.35 (dd,  $J = 7.3, 0.6$  Hz, 1H), 7.31 - 7.25 (m, 2H), 7.22 (dd,  $J = 7.8, 1.2$  Hz, 1H), 7.07 - 6.98 (m, 3H), 6.69 (d,  $J = 7.8$  Hz, 1H), 5.21 - 5.15 (m, 2H), 4.94 (d,  $J = 12.6$  Hz, 1H), 4.84 (s, 2H), 4.72 (dd,  $J = 12.6, 1.5$  Hz, 1H), 3.10 (d,  $J = 15.8$  Hz, 1H), 2.86 (dd,  $J = 15.8, 1.7$  Hz, 1H) ppm.  $^{13}\text{C NMR}$  (75 MHz,  $\text{CDCl}_3$ )  $\delta$  176.6, 162.3 (d,  $J = 244.5$  Hz), 145.8, 142.5, 131.3 (d,  $J = 3.8$  Hz), 129.9, 129.5, 129.1, 129.0, 123.9, 123.3, 115.9, 115.6, 109.2, 106.1, 82.7, 72.2, 43.0, 41.3 ppm. **HRMS** (ESI)  $m/z$ :  $[\text{M}+\text{H}]^+$  calcd for  $\text{C}_{19}\text{H}_{17}\text{FNO}_2$ : 310.1238; Found: 310.1270.

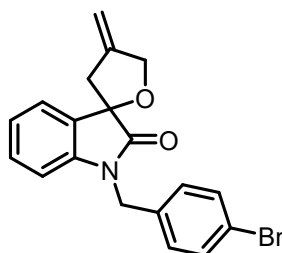

### 1'-(4-Bromobenzyl)-4-methylene-4,5-dihydro-3H-spiro[furan-2,3'-indolin]-2'-one **3q**

The reaction was conducted on a 0.10 mmol scale according to the general procedures (reaction time: 3.5 h) and afforded **3q** (22.6 mg, 61% yield).

Reddish brown oil.  $^1\text{H NMR}$  (300 MHz,  $\text{CDCl}_3$ )  $\delta$  7.47 - 7.43 (m, 2H), 7.35 (dd,  $J = 7.3, 0.7$  Hz, 1H), 7.25 - 7.16 (m, 3H), 7.08 - 7.03 (m, 1H), 6.66 (d,  $J = 7.8$  Hz, 1H), 5.22 - 5.15 (m, 2H), 4.94 (d,  $J = 12.6$  Hz, 1H), 4.82 (s, 2H), 4.72 (dd,  $J = 12.6, 1.6$  Hz, 1H), 3.10 (d,  $J = 15.8$  Hz, 1H), 2.86 (dd,  $J = 15.8, 1.8$  Hz, 1H) ppm.  $^{13}\text{C NMR}$  (75 MHz,  $\text{CDCl}_3$ )  $\delta$  176.6, 145.8, 142.4, 134.6, 132.0, 129.9, 129.4, 129.0, 123.9, 123.3, 121.6, 109.2, 106.1, 82.7, 72.2, 43.1, 41.3 ppm. **HRMS** (ESI)  $m/z$ :  $[\text{M}+\text{H}]^+$  calcd for  $\text{C}_{19}\text{H}_{17}\text{BrNO}_2$ : 370.0437; Found: 370.0485.

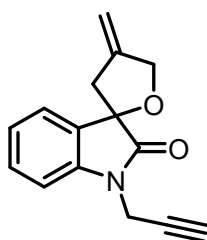

#### 4-Methylene-1'-(prop-2-yn-1-yl)-4,5-dihydro-3H-spiro[furan-2,3'-indolin]-2'-one **3r**

The reaction was conducted on a 0.10 mmol scale according to the general procedures (reaction time: 5 h) and afforded **3r** (14.3 mg, 60% yield).

Orange oil.  $^1\text{H NMR}$  (300 MHz,  $\text{CDCl}_3$ )  $\delta$  7.38 - 7.33 (m, 2H), 7.11 (t,  $J = 7.2$  Hz, 1H), 7.05 (d,  $J = 8.0$  Hz, 1H), 5.20 - 5.13 (m, 2H), 4.90 (d,  $J = 12.6$  Hz, 1H), 4.70 (dd,  $J = 12.6, 1.5$  Hz, 1H), 4.55 (dd,  $J = 17.7, 2.5$  Hz, 1H), 4.39 (dd,  $J = 17.7, 2.5$  Hz, 1H), 3.06 (d,  $J = 15.9$  Hz, 1H), 2.83 (dd,  $J = 15.9, 1.8$  Hz, 1H), 2.25 (t,  $J = 2.5$  Hz, 1H) ppm.  $^{13}\text{C NMR}$  (75 MHz,  $\text{CDCl}_3$ )  $\delta$  175.5, 145.7, 141.7, 129.9, 129.3, 123.8, 123.5, 109.4, 106.0, 82.7, 76.6, 72.5, 72.2, 41.2, 29.2 ppm. HRMS (ESI)  $m/z$ :  $[\text{M}+\text{H}]^+$  calcd for  $\text{C}_{15}\text{H}_{14}\text{NO}_2$ : 240.1019; Found 240.1069.

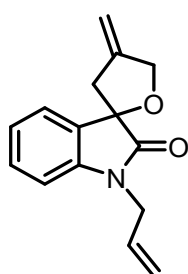

#### 1'-Allyl-4-methylene-4,5-dihydro-3H-spiro[furan-2,3'-indolin]-2'-one **3s**

The reaction was conducted on a 0.10 mmol scale according to the general procedures (reaction time: 3.5 h) and afforded **3s** (20.8 mg, 86% yield).

Light-yellow oil.  $^1\text{H NMR}$  (300 MHz,  $\text{CDCl}_3$ )  $\delta$  7.35 - 7.32 (m, 1H), 7.29 - 7.26 (m, 1H), 7.06 (t,  $J = 7.5$  Hz, 1H), 6.82 (d,  $J = 7.8$  Hz, 1H), 5.90 - 5.78 (m, 1H), 5.27 - 5.14 (m, 4H), 4.91 (d,  $J = 12.6$  Hz, 1H), 4.70 (d,  $J = 12.6$  Hz, 1H), 4.38 - 4.24 (m, 2H), 3.06 (d,  $J = 15.8$  Hz, 1H), 2.82 (dd,  $J = 15.8, 1.2$  Hz, 1H) ppm.  $^{13}\text{C NMR}$  (75 MHz,  $\text{CDCl}_3$ )  $\delta$  176.1, 145.9, 142.8, 131.2, 129.8, 129.4, 123.8, 123.0, 117.7, 109.3, 106.0, 82.6, 72.1, 42.2, 41.3 ppm. HRMS (ESI)  $m/z$ :  $[\text{M}+\text{H}]^+$  calcd for  $\text{C}_{15}\text{H}_{16}\text{NO}_2$ : 242.1176; Found: 242.1216.

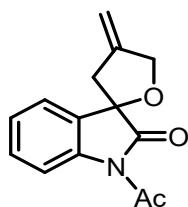

#### 1'-Acetyl-4-methylene-4,5-dihydro-3H-spiro[furan-2,3'-indolin]-2'-one **3t**

The reaction was conducted on a 0.10 mmol scale according to the general procedures (reaction time: 3 h) and afforded **3t** (8.5 mg, 35% yield).

Colorless oil.  $^1\text{H NMR}$  (300 MHz,  $\text{CDCl}_3$ )  $\delta$  8.26 - 8.23 (m, 1H), 7.43 - 7.37 (m, 2H), 7.27 - 7.22 (m, 1H), 5.22 - 5.16 (m, 2H), 4.88 (d,  $J = 12.7$  Hz, 1H), 4.74 (dd,  $J = 12.6, 1.2$  Hz, 1H), 3.06 (d,  $J = 16.0$  Hz,

1H), 2.88 (dd,  $J = 16.0, 1.9$  Hz, 1H), 2.68 (s, 3H) ppm.  $^{13}\text{C}$  NMR (75 MHz,  $\text{CDCl}_3$ )  $\delta$  177.4, 170.6, 145.2, 140.1, 130.5, 128.2, 125.8, 123.6, 116.8, 106.3, 82.6, 72.4, 42.1, 26.5 ppm. HRMS (ESI)  $m/z$ :  $[\text{M}+\text{H}]^+$  calcd for  $\text{C}_{14}\text{H}_{14}\text{NO}_3$ : 244.0968; Found: 244.0997.

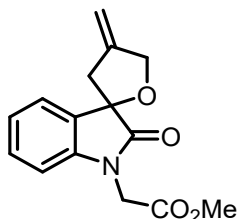

### Methyl 2-(4-methylene-2'-oxo-4,5-dihydro-3H-spiro[furan-2,3'-indolin]-1'-yl)acetate **3u**

The reaction was conducted on a 0.10 mmol scale according to the general procedures (reaction time: 2 h) and afforded **3u** (21.9 mg, 80% yield).

Yellow oil.  $^1\text{H}$  NMR (300 MHz,  $\text{CDCl}_3$ )  $\delta$  7.36 (d,  $J = 7.4$  Hz, 1H), 7.32 (dd,  $J = 7.8, 1.0$  Hz, 1H), 7.09 (t,  $J = 7.4$  Hz, 1H), 6.71 (d,  $J = 7.8$  Hz, 1H), 5.20 - 5.12 (m, 2H), 4.90 (d,  $J = 12.6$  Hz, 1H), 4.71 (dd,  $J = 12.7, 1.4$  Hz, 1H), 4.57 (d,  $J = 17.6$  Hz, 1H), 4.30 (d,  $J = 17.6$  Hz, 1H), 3.76 (s, 3H), 3.08 (d,  $J = 15.9$  Hz, 1H), 2.85 (dd,  $J = 15.9, 1.7$  Hz, 1H) ppm.  $^{13}\text{C}$  NMR (75 MHz,  $\text{CDCl}_3$ )  $\delta$  176.4, 167.9, 145.7, 142.2, 130.0, 129.2, 124.0, 123.5, 108.4, 106.1, 82.6, 72.2, 52.6, 41.5, 41.1 ppm. HRMS (ESI)  $m/z$ :  $[\text{M}+\text{H}]^+$  calcd for  $\text{C}_{15}\text{H}_{16}\text{NO}_4$ : 274.1074; Found: 274.1096.

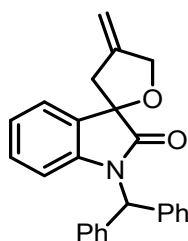

### 1'-Benzhydryl-4-methylene-4,5-dihydro-3H-spiro[furan-2,3'-indolin]-2'-one **3v**

The reaction was conducted on a 0.10 mmol scale according to the general procedures (reaction time: 3 h) and afforded **3v** (29.8 mg, 81% yield).

Yellow solid. MP: 83.4 – 85.1 °C.  $^1\text{H}$  NMR (300 MHz,  $\text{CDCl}_3$ )  $\delta$  7.39 - 7.32 (m, 11H), 7.07 - 7.00 (m, 2H), 6.97 (s, 1H), 6.50 - 6.43 (m, 1H), 5.21 - 5.15 (m, 2H), 4.96 (d,  $J = 12.5$  Hz, 1H), 4.74 (d,  $J = 12.6$  Hz, 1H), 3.10 (d,  $J = 15.8$  Hz, 1H), 2.88 (dd,  $J = 15.8, 1.5$  Hz, 1H) ppm.  $^{13}\text{C}$  NMR (75 MHz,  $\text{CDCl}_3$ )  $\delta$  176.8, 146.0, 142.4, 137.6, 137.3, 129.5, 129.4, 128.63, 128.60, 128.5, 128.4, 127.8, 123.7, 122.8, 112.2, 106.0, 82.4, 72.2, 58.1, 41.6 ppm. HRMS (ESI)  $m/z$ :  $[\text{M}+\text{H}]^+$  calcd for  $\text{C}_{25}\text{H}_{22}\text{NO}_2$ : 368.1645; Found: 368.1695.

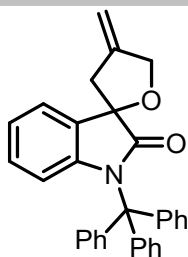

#### 4-Methylene-1'-trityl-4,5-dihydro-3H-spiro[furan-2,3'-indolin]-2'-one **3w**

The reaction was conducted on a 0.10 mmol scale according to the general procedures (reaction time: 3 h) and afforded **3w** (38.2 mg, 86% yield).

Light-yellow solid. **MP**: 114.6 - 116.3 °C. **<sup>1</sup>H NMR** (300 MHz, CDCl<sub>3</sub>) δ 7.50 (d, *J* = 7.3 Hz, 6H), 7.33 (d, *J* = 7.0 Hz, 7H), 7.30 (s, 3H), 7.23 (s, 1H), 7.00 - 6.92 (m, 2H), 5.17 - 5.09 (m, 2H), 4.90 (d, *J* = 12.5 Hz, 1H), 4.70 (d, *J* = 12.5 Hz, 1H), 3.10 (d, *J* = 15.9 Hz, 1H), 2.85 (dd, *J* = 15.9, 1.2 Hz, 1H) ppm. **<sup>13</sup>C NMR** (75 MHz, CDCl<sub>3</sub>) δ 177.6, 146.1, 143.4, 141.9, 129.7, 129.3, 128.4, 127.9, 127.7, 126.9, 123.2, 122.5, 116.0, 105.7, 82.6, 74.2, 72.3, 41.2 ppm. **HRMS** (ESI) *m/z*: [M+H]<sup>+</sup> calcd for C<sub>31</sub>H<sub>26</sub>NO<sub>2</sub>: 444.1958; Found: 444.1982.

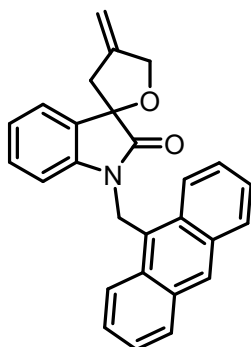

#### 1'-(Anthracen-9-ylmethyl)-4-methylene-4,5-dihydro-3H-spiro[furan-2,3'-indolin]-2'-one **3x**

The reaction was conducted on a 0.10 mmol scale according to the general procedures (reaction time: 7 h) and afforded **3x** (21.7 mg, 55% yield).

Yellow solid. **MP**: 203.8 - 204.7 °C. **<sup>1</sup>H NMR** (300 MHz, CDCl<sub>3</sub>) δ 8.46 (d, *J* = 7.5 Hz, 2H), 8.42 (s, 1H), 8.04 (d, *J* = 8.4 Hz, 2H), 7.64 - 7.58 (m, 2H), 7.50 (t, *J* = 7.8 Hz, 2H), 7.21 (dd, *J* = 7.3, 1.4 Hz, 1H), 6.84 - 6.74 (m, 2H), 6.26 - 6.23 (m, 1H), 6.04 (d, *J* = 15.5 Hz, 1H), 5.74 (d, *J* = 15.5 Hz, 1H), 5.24 - 5.19 (m, 2H), 5.06 (d, *J* = 12.6 Hz, 1H), 4.76 (dd, *J* = 12.6, 1.3 Hz, 1H), 3.12 (d, *J* = 15.8 Hz, 1H), 2.78 (dd, *J* = 15.8, 1.6 Hz, 1H) ppm. **<sup>13</sup>C NMR** (75 MHz, CDCl<sub>3</sub>) δ 176.8, 145.9, 142.7, 131.4, 130.9, 129.66, 129.61, 129.55, 128.9, 126.9, 125.8, 125.1, 123.6, 123.4, 122.7, 110.4, 106.0, 82.8, 72.4, 41.9, 37.5 ppm. **HRMS** (ESI) *m/z*: [M+H]<sup>+</sup> calcd for C<sub>27</sub>H<sub>22</sub>NO<sub>2</sub>: 392.1645; Found: 392.1686.

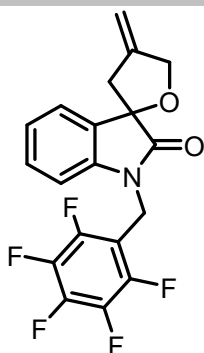

#### 4-Methylene-1'-((perfluorophenyl)methyl)-4,5-dihydro-3H-spiro[furan-2,3'-indolin]-2'-one **3y**

The reaction was conducted on a 0.10 mmol scale according to the general procedures (reaction time: 2.5 h) and afforded **3y** (30.2 mg, 79% yield).

Light-pink oil. **<sup>1</sup>H NMR** (300 MHz, CDCl<sub>3</sub>)  $\delta$  7.34 (dd,  $J = 7.4, 0.7$  Hz, 1H), 7.30 - 7.25 (m, 1H), 7.09 - 7.04 (m, 1H), 6.78 (d,  $J = 7.8$  Hz, 1H), 5.20 - 5.13 (m, 2H), 5.05 (d,  $J = 15.5$  Hz, 1H), 4.92 - 4.84 (m, 2H), 4.69 (dd,  $J = 12.6, 1.4$  Hz, 1H), 3.03 (d,  $J = 15.8$  Hz, 1H), 2.82 (dd,  $J = 15.8, 1.7$  Hz, 1H) ppm. **<sup>13</sup>C NMR** (75 MHz, CDCl<sub>3</sub>)  $\delta$  176.0, 147.4 - 146.9 (m), 145.6, 144.1 - 143.6 (m), 143.1 - 142.7 (m), 141.7, 139.7 - 139.0 (m), 136.2 - 135.7 (m), 130.0, 129.3, 124.1, 123.5, 109.2 - 108.7 (m), 108.2 (t,  $J = 2.3$  Hz), 106.1, 82.4, 72.2, 41.4, 31.8 ppm. **HRMS (ESI)**  $m/z$ : [M+H]<sup>+</sup> calcd for C<sub>19</sub>H<sub>13</sub>F<sub>5</sub>NO<sub>2</sub>: 382.0861; Found: 382.0853.

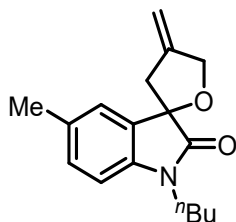

#### 1'-Butyl-7'-methyl-4-methylene-4,5-dihydro-3H-spiro[furan-2,3'-indolin]-2'-one **3aa**

The reaction was conducted on a 0.10 mmol scale according to the general procedures (reaction time: 1 h) and afforded **3aa** (24.1 mg, 89% yield).

Light-yellow oil. **<sup>1</sup>H NMR** (300 MHz, CDCl<sub>3</sub>)  $\delta$  7.17 (d,  $J = 7.0$  Hz, 1H), 7.05 (d,  $J = 7.6$  Hz, 1H), 6.95 (t,  $J = 7.4$  Hz, 1H), 5.16 - 5.10 (m, 2H), 4.89 (d,  $J = 12.6$  Hz, 1H), 4.67 (dd,  $J = 12.6, 1.4$  Hz, 1H), 3.94 - 3.78 (m, 2H), 3.00 (d,  $J = 15.8$  Hz, 1H), 2.75 (dd,  $J = 15.8, 1.7$  Hz, 1H), 2.49 (s, 3H), 1.69 - 1.59 (m, 2H), 1.46 - 1.34 (m, 2H), 0.96 (t,  $J = 7.3$  Hz, 3H) ppm. **<sup>13</sup>C NMR** (75 MHz, CDCl<sub>3</sub>)  $\delta$  177.4, 146.3, 140.8, 133.8, 130.5, 122.9, 121.7, 119.6, 105.7, 82.0, 72.1, 41.5, 41.4, 31.7, 19.9, 18.9, 13.8 ppm.

**HRMS (ESI)**  $m/z$ : [M+H]<sup>+</sup> calcd for C<sub>17</sub>H<sub>22</sub>NO<sub>2</sub>: 272.1645; Found: 272.1673.

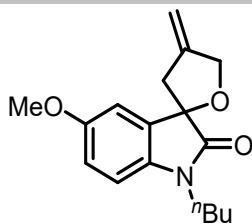

**1'-Butyl-5'-methoxy-4-methylene-4,5-dihydro-3H-spiro[furan-2,3'-indolin]-2'-one 3ba.**

The reaction was conducted on a 0.10 mmol scale according to the general procedures (reaction time: 1 h) and afforded **3ba** (27.6mg, 96% yield).

Yellow oil. <sup>1</sup>H NMR (300 MHz, CDCl<sub>3</sub>) δ 6.93 (d, *J* = 2.4 Hz, 1H), 6.81 (dd, *J* = 8.5, 2.4 Hz, 1H), 6.71 (d, *J* = 8.5 Hz, 1H), 5.16 - 5.10 (m, 2H), 4.88 (d, *J* = 12.6 Hz, 1H), 4.66 (d, *J* = 12.6 Hz, 1H), 3.77 (s, 3H), 3.66 - 3.60 (m, 2H), 3.02 (d, *J* = 15.7 Hz, 1H), 2.75 (dd, *J* = 15.7, 1.3 Hz, 1H), 1.67 - 1.58 (m, 2H), 1.42 - 1.30 (m, 2H), 0.93 (t, *J* = 7.3 Hz, 3H) ppm. <sup>13</sup>C NMR (75 MHz, CDCl<sub>3</sub>) δ 176.0, 156.2, 146.0, 136.3, 130.9, 114.13, 111.1, 109.1, 105.9, 82.9, 72.1, 55.8, 41.4, 39.7, 29.3, 20.1, 13.7 ppm. HRMS (ESI) *m/z*: [M+H]<sup>+</sup> calcd for C<sub>17</sub>H<sub>22</sub>NO<sub>3</sub>: 288.1594; Found: 288.1625.

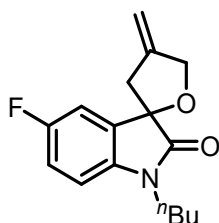

**1'-Butyl-5'-fluoro-4-methylene-4,5-dihydro-3H-spiro[furan-2,3'-indolin]-2'-one 3ca**

The reaction was conducted on a 0.10 mmol scale according to the general procedures (reaction time: 1 h) and afforded **3ca** (27.5 mg, > 99% yield).

Yellow oil. <sup>1</sup>H NMR (300 MHz, CDCl<sub>3</sub>) δ 7.07 (dd, *J* = 7.6, 2.6 Hz, 1H), 7.00 (td, *J* = 8.8, 2.6 Hz, 1H), 6.74 (dd, *J* = 8.5, 4.0 Hz, 1H), 5.19 - 5.14 (m, 2H), 4.89 (d, *J* = 12.6 Hz, 1H), 4.67 (dd, *J* = 12.6, 1.6 Hz, 1H), 3.65 (t, *J* = 7.2 Hz, 2H), 3.05 (d, *J* = 15.7 Hz, 1H), 2.75 (dd, *J* = 15.7, 1.7 Hz, 1H), 1.69 - 1.59 (m, 2H), 1.44 - 1.31 (m, 2H), 0.95 (t, *J* = 7.3 Hz, 3H) ppm. <sup>13</sup>C NMR (75 MHz, CDCl<sub>3</sub>) δ 176.0, 159.3 (d, *J* = 240.0 Hz), 145.5, 138.8 (d, *J* = 2.3 Hz), 131.4 (d, *J* = 7.5 Hz), 115.9 (d, *J* = 23.2 Hz), 112.0 (d, *J* = 24.8 Hz), 109.2 (d, *J* = 8.2 Hz), 106.3, 82.6, 72.2, 41.3, 39.8, 29.2, 20.1, 13.7 ppm. HRMS (ESI) *m/z*: [M+H]<sup>+</sup> calcd for C<sub>16</sub>H<sub>19</sub>FNO<sub>2</sub>: 276.1394; Found: 276.1429.

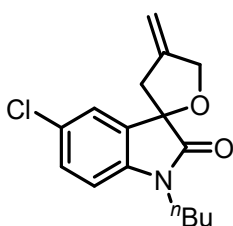

### 1'-Butyl-5'-chloro-4-methylene-4,5-dihydro-3H-spiro[furan-2,3'-indolin]-2'-one **3da**

The reaction was conducted on a 0.10 mmol scale according to the general procedures (reaction time: 0.5 h) and afforded **3da** (26.6 mg, 91% yield).

Yellow oil.  $^1\text{H NMR}$  (300 MHz,  $\text{CDCl}_3$ )  $\delta$  7.29 - 7.25 (m, 2H), 6.75 (d,  $J = 8.0$  Hz, 1H), 5.19 - 5.14 (m, 2H), 4.88 (d,  $J = 12.6$  Hz, 1H), 4.67 (dd,  $J = 12.6, 1.6$  Hz, 1H), 3.64 (t,  $J = 7.2$  Hz, 2H), 3.04 (d,  $J = 15.7$  Hz, 1H), 2.76 (dd,  $J = 15.7, 1.7$  Hz, 1H), 1.68 - 1.58 (m, 2H), 1.43 - 1.31 (m, 2H), 0.94 (t,  $J = 7.3$  Hz, 3H) ppm.  $^{13}\text{C NMR}$  (75 MHz,  $\text{CDCl}_3$ )  $\delta$  175.9, 145.4, 141.5, 131.5, 129.6, 128.2, 124.4, 109.6, 106.4, 82.4, 72.2, 41.3, 39.8, 29.2, 20.1, 13.7 ppm. **HRMS** (ESI)  $m/z$ :  $[\text{M}+\text{H}]^+$  calcd for  $\text{C}_{16}\text{H}_{19}\text{ClNO}_2$ : 292.1099; Found: 292.1138.

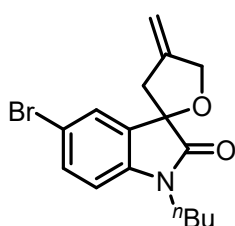

### 5'-Bromo-1'-butyl-4-methylene-4,5-dihydro-3H-spiro[furan-2,3'-indolin]-2'-one **3ea**

The reaction was conducted on a 0.10 mmol scale according to the general procedures (reaction time: 0.5 h) and afforded **3ea** (32.5 mg, 97% yield).

Yellow oil.  $^1\text{H NMR}$  (300 MHz,  $\text{CDCl}_3$ )  $\delta$  7.44 - 7.40 (m, 2H), 6.70 (d,  $J = 8.8$  Hz, 1H), 5.20 - 5.13 (m, 2H), 4.87 (d,  $J = 12.6$  Hz, 1H), 4.67 (dd,  $J = 12.6, 1.7$  Hz, 1H), 3.64 (t,  $J = 7.2$  Hz, 2H), 3.04 (d,  $J = 15.6$  Hz, 1H), 2.76 (dd,  $J = 15.8, 1.8$  Hz, 1H), 1.68 - 1.58 (m, 2H), 1.43 - 1.30 (m, 2H), 0.94 (t,  $J = 7.3$  Hz, 3H) ppm.  $^{13}\text{C NMR}$  (75 MHz,  $\text{CDCl}_3$ )  $\delta$  175.8, 145.3, 142.1, 132.6, 131.8, 127.1, 115.4, 110.1, 106.4, 82.4, 72.2, 41.3, 39.8, 29.2, 20.1, 13.7 ppm. **HRMS** (ESI)  $m/z$ :  $[\text{M}+\text{H}]^+$  calcd for  $\text{C}_{16}\text{H}_{19}\text{BrNO}_2$ : 336.0594; Found: 336.0639.

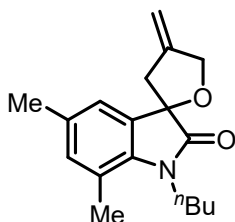

### 1'-Butyl-5',7'-dimethyl-4-methylene-4,5-dihydro-3H-spiro[furan-2,3'-indolin]-2'-one **3fa**

The reaction was conducted on a 0.10 mmol scale according to the general procedures (reaction time: 3.5 h) and afforded **3fa** (23.0 mg, 81% yield).

Colorless oil.  $^1\text{H NMR}$  (300 MHz,  $\text{CDCl}_3$ )  $\delta$  7.00 (s, 1H), 6.86 (s, 1H), 5.16 - 5.10 (m, 2H), 4.89 (d,  $J = 12.5$  Hz, 1H), 4.67 (dd,  $J = 12.6, 1.4$  Hz, 1H), 3.92 - 3.76 (m, 2H), 2.99 (d,  $J = 15.8$  Hz, 1H), 2.75 (dd,  $J$



= 15.8, 1.7 Hz, 1H), 2.45 (s, 3H), 2.28 (s, 3H), 1.68 - 1.58 (m, 2H), 1.46 - 1.33 (m, 2H), 0.95 (t,  $J = 7.3$  Hz, 3H) ppm.  $^{13}\text{C}$  NMR (75 MHz,  $\text{CDCl}_3$ )  $\delta$  177.4, 146.4, 138.3, 134.2, 132.4, 130.6, 122.4, 119.3, 105.6, 82.2, 72.1, 41.5, 41.3, 31.6, 20.6, 19.9, 18.7, 13.8 ppm. HRMS (ESI)  $m/z$ :  $[\text{M}+\text{H}]^+$  calcd for  $\text{C}_{18}\text{H}_{24}\text{NO}_2$ : 286.1802; Found: 286.1845.

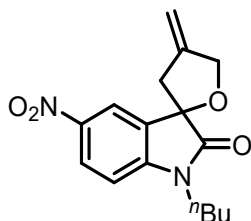

### 1'-Butyl-4-methylene-5'-nitro-4,5-dihydro-3H-spiro[furan-2,3'-indolin]-2'-one **3ga**

The reaction was conducted on a 0.10 mmol scale according to the general procedures (reaction time: 12 h) and afforded **3ga** (28.9 mg, 96% yield).

Reddish brown oil.  $^1\text{H}$  NMR (300 MHz,  $\text{CDCl}_3$ )  $\delta$  8.15 (dd,  $J = 8.7, 2.3$  Hz, 1H), 8.06 (d,  $J = 2.2$  Hz, 1H), 6.89 (d,  $J = 8.7$  Hz, 1H), 5.14 - 5.09 (m, 2H), 4.78 (d,  $J = 12.6$  Hz, 1H), 4.63 (dd,  $J = 12.6, 0.9$  Hz, 1H), 3.64 (t,  $J = 7.2$  Hz, 2H), 2.97 (d,  $J = 15.8$  Hz, 1H), 2.77 (dd,  $J = 15.8, 1.3$  Hz, 1H), 1.63 - 1.53 (m, 2H), 1.36 - 1.23 (m, 2H), 0.86 (t,  $J = 7.3$  Hz, 3H) ppm.  $^{13}\text{C}$  NMR (75 MHz,  $\text{CDCl}_3$ )  $\delta$  176.4, 148.8, 144.7, 143.3, 130.5, 126.9, 119.6, 108.4, 106.8, 81.8, 72.3, 41.1, 40.0, 29.2, 20.0, 13.6 ppm. HRMS (ESI)  $m/z$ :  $[\text{M}+\text{H}]^+$  calcd for  $\text{C}_{16}\text{H}_{19}\text{N}_2\text{O}_4$ : 303.1339; Found: 330.1387.

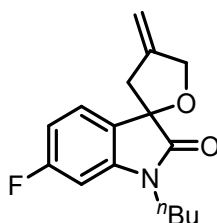

### 1'-Butyl-6'-fluoro-4-methylene-4,5-dihydro-3H-spiro[furan-2,3'-indolin]-2'-one **3ha**

The reaction was conducted on a 0.10 mmol scale according to the general procedures (reaction time: 3 h) and afforded **3ha** (21.1 mg, 77% yield).

Pink oil.  $^1\text{H}$  NMR (300 MHz,  $\text{CDCl}_3$ )  $\delta$  7.29 - 7.24 (m, 1H), 6.75 - 6.69 (m, 1H), 6.56 (dd,  $J = 9.0, 2.0$  Hz, 1H), 5.15 (d,  $J = 13.9$  Hz, 2H), 4.88 (d,  $J = 12.6$  Hz, 1H), 4.66 (dd,  $J = 12.6, 0.7$  Hz, 1H), 3.63 (t,  $J = 7.2$  Hz, 2H), 3.02 (d,  $J = 15.8$  Hz, 1H), 2.76 (dd,  $J = 15.8, 1.2$  Hz, 1H), 1.69 - 1.60 (m, 2H), 1.44 - 1.32 (m, 2H), 0.96 (t,  $J = 7.3$  Hz, 3H) ppm.  $^{13}\text{C}$  NMR (75 MHz,  $\text{CDCl}_3$ )  $\delta$  176.6, 164.1 (d,  $J = 245.2$  Hz), 145.7, 144.8 (d,  $J = 11.2$  Hz), 125.1 (d,  $J = 9.8$  Hz), 124.9, 108.8 (d,  $J = 22.5$  Hz), 106.1, 97.5 (d,  $J = 27.8$  Hz), 82.2, 72.0, 41.2, 39.8, 29.3, 20.1, 13.7 ppm. HRMS (ESI)  $m/z$ :  $[\text{M}+\text{H}]^+$  calcd for  $\text{C}_{16}\text{H}_{19}\text{FNO}_2$ : 276.1394; Found: 276.1417.

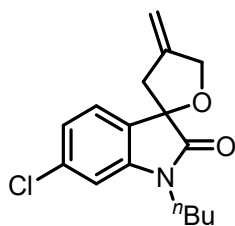

### 1'-Butyl-6'-chloro-4-methylene-4,5-dihydro-3H-spiro[furan-2,3'-indolin]-2'-one **3ia**

The reaction was conducted on a 0.10 mmol scale according to the general procedures (reaction time: 1.5 h) and afforded **3ia** (22.9 mg, 78% yield).

Grey oil.  $^1\text{H NMR}$  (300 MHz,  $\text{CDCl}_3$ )  $\delta$  7.23 (d,  $J = 15.8$  Hz, 1H), 7.02 (dd,  $J = 7.9, 1.7$  Hz, 1H), 6.81 (d,  $J = 1.6$  Hz, 1H), 5.18 - 5.12 (m, 2H), 4.88 (d,  $J = 12.7$  Hz, 1H), 4.66 (dd,  $J = 12.6, 1.5$  Hz, 1H), 3.64 (t,  $J = 7.2$  Hz, 2H), 3.02 (d,  $J = 15.8$  Hz, 1H), 2.75 (dd,  $J = 15.8, 1.7$  Hz, 1H), 1.70 - 1.60 (m, 2H), 1.44 - 1.32 (m, 2H), 0.96 (t,  $J = 7.3$  Hz, 3H) ppm.  $^{13}\text{C NMR}$  (75 MHz,  $\text{CDCl}_3$ )  $\delta$  176.3, 145.6, 144.3, 135.7, 128.1, 124.8, 122.6, 109.3, 106.2, 82.2, 72.1, 41.2, 39.8, 29.2, 20.1, 13.7 ppm. **HRMS** (ESI)  $m/z$ :  $[\text{M}+\text{H}]^+$  calcd for  $\text{C}_{16}\text{H}_{19}\text{ClNO}_2$ : 292.1099; Found: 292.1128.

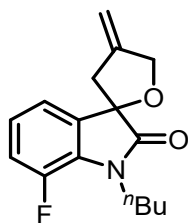

### 1'-Butyl-7'-chloro-4-methylene-4,5-dihydro-3H-spiro[furan-2,3'-indolin]-2'-one **3ja**

The reaction was conducted on a 0.10 mmol scale according to the general procedures (reaction time: 1 h) and afforded **3ja** (26.2 mg, 95% yield).

Light-yellow oil.  $^1\text{H NMR}$  (300 MHz,  $\text{CDCl}_3$ )  $\delta$  7.12 (d,  $J = 6.9$  Hz, 1H), 7.08 - 6.96 (m, 2H), 5.18 - 5.13 (m, 2H), 4.89 (d,  $J = 12.6$  Hz, 1H), 4.68 (d,  $J = 12.7$  Hz, 1H), 3.81 (t,  $J = 7.3$  Hz, 2H), 3.04 (d,  $J = 15.8$  Hz, 1H), 2.77 (d,  $J = 15.8$  Hz, 1H), 1.72 - 1.62 (m, 2H), 1.45 - 1.32 (m, 2H), 0.95 (t,  $J = 7.3$  Hz, 3H) ppm.  $^{13}\text{C NMR}$  (75 MHz,  $\text{CDCl}_3$ )  $\delta$  176.0, 150.5 (d,  $J = 231.0$  Hz), 145.6, 132.7 (d,  $J = 3.0$  Hz), 129.6 (d,  $J = 9.0$  Hz), 123.6 (d,  $J = 6$  Hz), 119.6 (d,  $J = 3.0$  Hz), 118.0 (d,  $J = 20.2$  Hz), 106.1, 82.6 (d,  $J = 2.3$  Hz), 72.2, 41.7 (d,  $J = 5.3$  Hz), 41.5, 30.9 (d,  $J = 3.0$  Hz), 19.9, 13.7 ppm. **HRMS** (ESI)  $m/z$ :  $[\text{M}+\text{H}]^+$  calcd for  $\text{C}_{16}\text{H}_{19}\text{FNO}_2$ : 276.1394; Found: 276.1360.

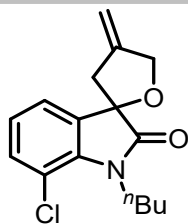

### 1'-Butyl-7'-chloro-4-methylene-4,5-dihydro-3H-spiro[furan-2,3'-indolin]-2'-one **3ka**

The reaction was conducted on a 0.10 mmol scale according to the general procedures (reaction time: 1 h) and afforded **3ka** (29.1 mg, >99% yield).

Yellow oil. <sup>1</sup>H NMR (300 MHz, CDCl<sub>3</sub>) δ 7.24 - 7.20 (m, 2H), 6.96 (t, *J* = 7.9 Hz, 1H), 5.17 - 5.12 (m, 2H), 4.88 (d, *J* = 12.6 Hz, 1H), 4.67 (dd, *J* = 12.6, 1.5 Hz, 1H), 4.02 (t, *J* = 7.5 Hz, 2H), 3.01 (d, *J* = 15.8 Hz, 1H), 2.74 (dd, *J* = 15.8, 1.8 Hz, 1H), 1.74 - 1.64 (m, 2H), 1.44 - 1.32 (m, 2H), 0.95 (t, *J* = 7.3 Hz, 3H) ppm. <sup>13</sup>C NMR (75 MHz, CDCl<sub>3</sub>) δ 176.8, 145.6, 139.0, 132.8, 132.3, 123.8, 122.3, 115.3, 106.2, 81.9, 72.2, 41.6, 41.3, 31.7, 19.8, 13.8 ppm. HRMS (ESI) *m/z*: [M+H]<sup>+</sup> calcd for C<sub>16</sub>H<sub>19</sub>ClNO<sub>2</sub>: 292.1099; Found: 292.1104.

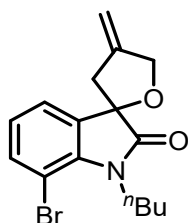

### 7'-Bromo-1'-butyl-4-methylene-4,5-dihydro-3H-spiro[furan-2,3'-indolin]-2'-one **3la**

The reaction was conducted on a 0.10 mmol scale according to the general procedures (reaction time: 3 h) and afforded **3la** (28.7 mg, 85% yield).

Yellow oil. <sup>1</sup>H NMR (300 MHz, CDCl<sub>3</sub>) δ 7.41 (dd, *J* = 8.2, 1.1 Hz, 1H), 7.25 (dd, *J* = 7.3, 1.0 Hz, 1H), 6.92 - 6.87 (m, 1H), 5.17 - 5.11 (m, 2H), 4.88 (d, *J* = 12.6 Hz, 1H), 4.66 (dd, *J* = 12.6, 1.5 Hz, 1H), 4.05 (t, *J* = 7.6 Hz, 2H), 3.01 (d, *J* = 15.8 Hz, 1H), 2.74 (dd, *J* = 15.8, 1.8 Hz, 1H), 1.74 - 1.64 (m, 2H), 1.45 - 1.33 (m, 2H), 0.95 (t, *J* = 7.3 Hz, 3H) ppm. <sup>13</sup>C NMR (75 MHz, CDCl<sub>3</sub>) δ 177.0, 145.6, 140.5, 135.6, 133.2, 124.1, 122.9, 106.2, 102.4, 81.8, 72.2, 41.6, 40.9, 31.6, 19.8, 13.8 ppm. HRMS (ESI) *m/z*: [M+H]<sup>+</sup> calcd for C<sub>16</sub>H<sub>19</sub>BrNO<sub>2</sub>: 336.0594; Found: 336.0563.

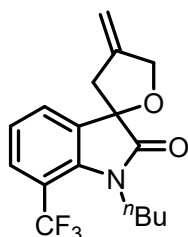

### 1'-Butyl-4-methylene-7'-(trifluoromethyl)-4,5-dihydro-3H-spiro[furan-2,3'-indolin]-2'-one **3ma**

The reaction was conducted on a 0.10 mmol scale according to the general procedures (reaction time: 1 h) and afforded **3ma** (30.8 mg, 95% yield).

Light-yellow oil.  $^1\text{H NMR}$  (300 MHz,  $\text{CDCl}_3$ )  $\delta$  7.59 (d,  $J = 8.1$  Hz, 1H), 7.49 (d,  $J = 7.1$  Hz, 1H), 7.11 (t,  $J = 7.7$  Hz, 1H), 5.18 - 5.13 (m, 2H), 4.90 (d,  $J = 12.5$  Hz, 1H), 4.69 (dd,  $J = 12.6, 1.5$  Hz, 1H), 3.91 - 3.75 (m, 2H), 3.02 (d,  $J = 15.8$  Hz, 1H), 2.76 (dd,  $J = 15.8, 1.8$  Hz, 1H), 1.65 - 1.54 (m, 2H), 1.42 - 1.30 (m, 2H), 0.93 (t,  $J = 7.3$  Hz, 3H) ppm.  $^{13}\text{C NMR}$  (75 MHz,  $\text{CDCl}_3$ )  $\delta$  177.7, 145.4, 141.1 (q,  $J = 2.3$  Hz), 132.5, 127.8 (q,  $J = 6.0$  Hz), 127.4, 123.4 (q,  $J = 269.9$  Hz), 122.3, 112.7 (q,  $J = 33.0$  Hz), 106.3, 80.6, 72.2, 42.1 (q,  $J = 4.5$  Hz), 41.5, 29.8 (q,  $J = 2.3$  Hz), 20.0, 13.6 ppm. **HRMS** (ESI)  $m/z$ :  $[\text{M}+\text{H}]^+$  calcd for  $\text{C}_{17}\text{H}_{19}\text{F}_3\text{NO}_2$ : 326.1362; Found: 326.1340.

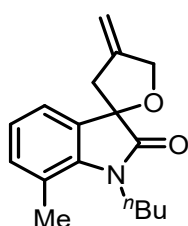

#### 1'-Butyl-7'-methyl-4-methylene-4,5-dihydro-3H-spiro[furan-2,3'-indolin]-2'-one **3na**

The reaction was conducted on a 0.10 mmol scale according to the general procedures (reaction time: 3.5 h) and afforded **3na** (23.5 mg, 87% yield).

Yellow oil.  $^1\text{H NMR}$  (300 MHz,  $\text{CDCl}_3$ )  $\delta$  7.17 (d,  $J = 7.0$  Hz, 1H), 7.05 (d,  $J = 7.6$  Hz, 1H), 6.95 (t,  $J = 7.4$  Hz, 1H), 5.16 - 5.10 (m, 2H), 4.89 (d,  $J = 12.6$  Hz, 1H), 4.67 (dd,  $J = 12.6, 1.4$  Hz, 1H), 3.94 - 3.78 (m, 2H), 3.00 (d,  $J = 15.8$  Hz, 1H), 2.75 (dd,  $J = 15.8, 1.7$  Hz, 1H), 2.49 (s, 3H), 1.69 - 1.59 (m, 2H), 1.46 - 1.34 (m, 2H), 0.96 (t,  $J = 7.3$  Hz, 3H) ppm.  $^{13}\text{C NMR}$  (75 MHz,  $\text{CDCl}_3$ )  $\delta$  177.4, 146.3, 140.8, 133.8, 130.5, 122.9, 121.7, 119.6, 105.7, 82.0, 72.1, 41.5, 41.4, 31.7, 19.9, 18.9, 13.8 ppm. **HRMS** (ESI)  $m/z$ :  $[\text{M}+\text{H}]^+$  calcd for  $\text{C}_{17}\text{H}_{22}\text{NO}_2$ : 272.1645; Found: 272.1689.

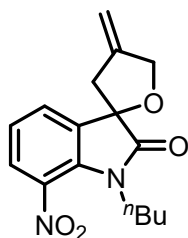

#### 1'-Butyl-4-methylene-7'-nitro-4,5-dihydro-3H-spiro[furan-2,3'-indolin]-2'-one **3oa**

The reaction was conducted on a 0.11 mmol scale according to the general procedures (reaction time: 3 h) and afforded **3oa** (29.7 mg, 89% yield).

Reddish brown oil.  $^1\text{H NMR}$  (300 MHz,  $\text{CDCl}_3$ )  $\delta$  7.69 (d,  $J = 8.3$  Hz, 1H), 7.53 (d,  $J = 6.6$  Hz, 1H), 7.14 (t,  $J = 8.0$  Hz, 1H), 5.21 - 5.16 (m, 2H), 4.91 (d,  $J = 12.6$  Hz, 1H), 4.71 (dd,  $J = 12.6, 1.2$  Hz, 1H),

3.97 - 3.87 (m, 1H), 3.76 - 3.67 (m, 1H), 3.07 (d,  $J = 15.8$  Hz, 1H), 2.80 (dd,  $J = 15.8, 1.6$  Hz, 1H), 1.45 - 1.35 (m, 2H), 1.32 - 1.20 (m, 2H), 0.88 (t,  $J = 7.2$  Hz, 3H) ppm.  $^{13}\text{C}$  NMR (75 MHz,  $\text{CDCl}_3$ )  $\delta$  177.3, 148.8, 144.8, 135.9, 133.7, 127.6, 125.8, 122.7, 106.8, 80.8, 72.4, 41.9, 41.7, 29.7, 19.7, 13.6 ppm. HRMS (ESI)  $m/z$ :  $[\text{M}+\text{H}]^+$  calcd for  $\text{C}_{16}\text{H}_{19}\text{N}_2\text{O}_4$ : 303.1339; Found: 303.1385.

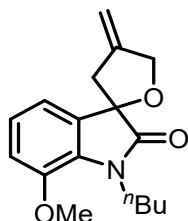

### 1'-Butyl-7'-methoxy-4-methylene-4,5-dihydro-3H-spiro[furan-2,3'-indolin]-2'-one **3pa**

The reaction was conducted on a 0.10 mmol scale according to the general procedures (reaction time: 3 h) and afforded **3pa** (29.7 mg, 72% yield).

Yellow oil.  $^1\text{H}$  NMR (300 MHz,  $\text{CDCl}_3$ )  $\delta$  7.04 - 6.94 (m, 2H), 6.90 (d,  $J = 8.0$  Hz, 1H), 5.16 - 5.10 (m, 2H), 4.89 (d,  $J = 12.6$  Hz, 1H), 4.67 (dd,  $J = 12.6, 1.4$  Hz, 1H), 3.90 (t,  $J = 7.3$  Hz, 2H), 3.86 (s, 3H), 3.01 (d,  $J = 15.8$  Hz, 1H), 2.75 (dd,  $J = 15.8, 1.6$  Hz, 1H), 1.69 - 1.59 (m, 2H), 1.43 - 1.30 (m, 2H), 0.94 (t,  $J = 7.3$  Hz, 3H) ppm.  $^{13}\text{C}$  NMR (75 MHz,  $\text{CDCl}_3$ )  $\delta$  176.6, 146.2, 145.0, 131.4, 130.9, 123.6, 116.3, 113.7, 105.8, 82.7, 72.1, 55.9, 42.0, 41.5, 31.4, 20.0, 13.8 ppm. HRMS (ESI)  $m/z$ :  $[\text{M}+\text{H}]^+$  calcd for  $\text{C}_{17}\text{H}_{22}\text{NO}_3$ : 288.1594; Found: 288.1569.

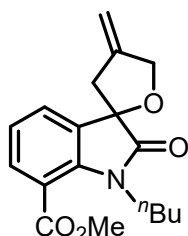

### Methyl 1'-butyl-4-methylene-2'-oxo-4,5-dihydro-3H-spiro[furan-2,3'-indoline]-7'-carboxylate **3qa**

The reaction was conducted on a 0.35 mmol scale according to the general procedures (reaction time: 3 h) and afforded **3qa** (74.7 mg, 69% yield).

Yellow oil.  $^1\text{H}$  NMR (300 MHz,  $\text{CDCl}_3$ )  $\delta$  7.53 (d,  $J = 8.0$  Hz, 1H), 7.41 (d,  $J = 6.8$  Hz, 1H), 7.05 (t,  $J = 7.6$  Hz, 1H), 5.16 - 5.11 (m, 2H), 4.89 (d,  $J = 12.6$  Hz, 1H), 4.67 (dd,  $J = 12.6, 0.7$  Hz, 1H), 4.01 - 3.78 (m, 5H), 3.01 (d,  $J = 15.8$  Hz, 1H), 2.75 (dd,  $J = 15.8, 1.4$  Hz, 1H), 1.47 - 1.37 (m, 2H), 1.32 - 1.19 (m, 2H), 0.87 (t,  $J = 7.3$  Hz, 3H) ppm.  $^{13}\text{C}$  NMR (75 MHz,  $\text{CDCl}_3$ )  $\delta$  177.6, 167.2, 145.6, 141.1, 131.8, 130.9, 126.4, 122.2, 116.4, 106.2, 81.3, 72.3, 52.6, 41.5, 41.3, 29.1, 19.8, 13.7 ppm. HRMS (ESI)  $m/z$ :  $[\text{M}+\text{H}]^+$  calcd for  $\text{C}_{18}\text{H}_{22}\text{NO}_4$ : 316.1543; Found: 316.1552.

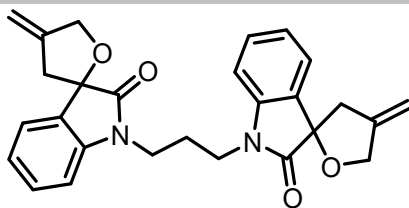

### 1',1'''-(Propane-1,3-diyl)bis(4-methylene-4,5-dihydro-3H-spiro[furan-2,3'-indolin]-2'-one) **3ra**

The reaction was conducted on a 0.10 mmol scale according to the general procedures (reaction time: 3 h) and afforded **3ra** (43.2 mg, 98% yield).

Yellow oil.  $^1\text{H NMR}$  (300 MHz,  $\text{CDCl}_3$ )  $\delta$  7.43 - 7.30 (m, 4H), 7.05 (t,  $J = 7.5$  Hz, 2H), 6.76 (dd,  $J = 7.8, 3.1$  Hz, 2H), 5.17 - 5.12 (m, 4H), 4.88 (d,  $J = 12.6$  Hz, 2H), 4.68 (dd,  $J = 12.6, 1.0$  Hz, 2H), 3.83 - 3.67 (m, 4H), 3.01 (d,  $J = 15.8$  Hz, 2H), 2.79 (d,  $J = 15.8$  Hz, 2H), 2.13 - 2.04 (m, 2H) ppm.  $^{13}\text{C NMR}$  (75 MHz,  $\text{CDCl}_3$ )  $\delta$  176.50, 176.45, 145.9, 142.5, 142.4, 130.0, 129.6, 129.5, 124.0, 123.2, 108.5, 108.4, 106.0, 82.6, 82.5, 72.1, 41.2, 37.6, 37.5, 25.3 ppm. **HRMS** (ESI)  $m/z$ :  $[\text{M}+\text{H}]^+$  calcd for  $\text{C}_{27}\text{H}_{27}\text{N}_2\text{O}_4$ : 443.1965; Found: 443.1996.

### 3. Transformations of products **3ea**, **3ga** and **3la**.

#### (1) The Suzuki Coupling Reaction of **3ea**

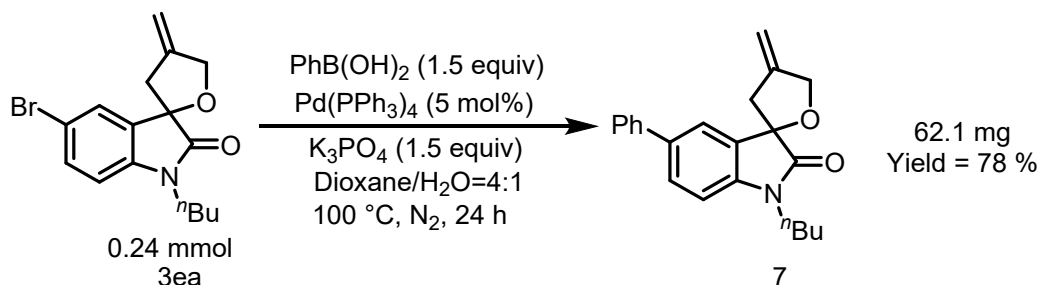

**3ea** (82.2 mg, 0.24 mmol, 1.0 equiv),  $\text{PhB(OH)}_2$  (44 mg, 0.36 mmol, 1.5 equiv),  $\text{Pd(PPh}_3)_4$  (14 mg, 0.012 mmol, 5 mol%),  $\text{K}_3\text{PO}_4$  (77 mg, 0.36 mmol, 1.5 equiv), 1,4-dioxane (2 mL) and  $\text{H}_2\text{O}$  (0.5 mL) were added into a 10 mL glass vial. The vial was purged with  $\text{N}_2$ . The reaction mixture was heated at 100 °C for 24 h. After being cooled to room temperature, the mixture was poured into water (3 mL), then extracted with EtOAc (5 mL $\times$ 3). The combined organic layer was washed with brine (20 mL), dried with anhydrous  $\text{Na}_2\text{SO}_4$  and filtered. The filtrate was concentrated in vacuo and the residue was purified by silica gel column chromatography to give the desired product **7** as a yellow oil in 78 % yield (62.1 mg).

**1'-Butyl-4-methylene-5'-phenyl-4,5-dihydro-3H-spiro[furan-2,3'-indolin]-2'-one (7)**,  $^1\text{H NMR}$  (300 MHz,  $\text{CDCl}_3$ )  $\delta$  7.58 - 7.54 (m, 4H), 7.45 (t,  $J = 7.4$  Hz, 2H), 7.35 (t,  $J = 7.2$  Hz, 1H), 6.92 (d,  $J = 8.2$

Hz, 1H), 5.22 - 5.16 (m, 2H), 4.96 (d,  $J = 12.6$  Hz, 1H), 4.75 (d,  $J = 12.7$  Hz, 1H), 3.72 (t,  $J = 7.2$  Hz, 2H), 3.11 (d,  $J = 15.8$  Hz, 1H), 2.88 (dd,  $J = 15.8, 1.3$  Hz, 1H), 1.76 - 1.66 (m, 2H), 1.49 - 1.37 (m, 2H), 0.99 (t,  $J = 7.3$  Hz, 3H) ppm.  $^{13}\text{C}$  NMR (75 MHz,  $\text{CDCl}_3$ )  $\delta$  176.4, 145.9, 142.4, 140.7, 136.4, 130.3, 128.8, 128.7, 127.1, 126.8, 122.8, 108.9, 106.1, 82.8, 72.2, 41.4, 39.8, 29.4, 20.2, 13.8 ppm. HRMS (ESI)  $m/z$ :  $[\text{M}+\text{H}]^+$  calcd for  $\text{C}_{22}\text{H}_{24}\text{NO}_2$ : 334.1802; Found: 334.1819.

(2) Oxidation of 3ga with *m*-chloroperoxybenzoic acid (*m*-CPBA)

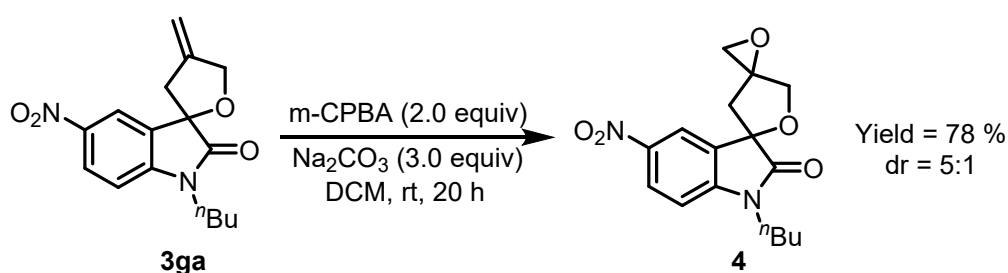

To a solution of 3ga (106.7 mg, 0.35 mmol) in DCM (4 mL) was sequentially added an aqueous solution of  $\text{Na}_2\text{CO}_3$  (111.3 mg, 3.0 equiv.) and 3-chloroperoxybenzoic acid (*m*-CPBA, 120.8 mg, 2.0 equiv.) at r.t. The reaction mixture was stirred for 20 h and poured into a saturated solution of aqueous sodium bicarbonate. The two layers were separated and the organic layer was washed with a saturated solution of aqueous sodium bicarbonate. This procedure was repeated twice more. The organic layer was dried over  $\text{MgSO}_4$ , filtered, and concentrated on a rotary evaporator. The crude product was purified by column chromatography to give 4 as a brown oil in 78 % yield, dr = 5:1 (86.7 mg).

**1-Butyl-5-nitro-3'H,5'H-dispiro[indoline-3,2'-furan-4',2''-oxiran]-2-one (4)**,  $^1\text{H}$  NMR (300 MHz,  $\text{CDCl}_3$ )  $\delta$  8.43 (d,  $J = 2.3$  Hz, 1H), 8.26 (dd,  $J = 8.7, 2.3$  Hz, 1H), 6.93 (d,  $J = 8.7$  Hz, 1H), 4.59 (d,  $J = 10.0$  Hz, 1H), 4.06 (d,  $J = 10.0$  Hz, 1H), 3.72 (td,  $J = 7.1, 2.5$  Hz, 2H), 3.18 (d,  $J = 4.1$  Hz, 1H), 3.11 (d,  $J = 4.1$  Hz, 1H), 2.87 (d,  $J = 14.0$  Hz, 1H), 2.17 (d,  $J = 14.0$  Hz, 1H), 1.71 - 1.61 (m, 2H), 1.43 - 1.31 (m, 2H), 0.94 (t,  $J = 7.3$  Hz, 4H) ppm.  $^{13}\text{C}$  NMR (75 MHz,  $\text{CDCl}_3$ )  $\delta$  176.3, 148.6, 143.7, 130.5, 127.0, 120.7, 108.4, 82.2, 73.0, 64.1, 48.4, 40.3, 40.0, 29.2, 20.0, 13.6. HRMS (ESI)  $m/z$ :  $[\text{M}+\text{H}]^+$  calcd for  $\text{C}_{16}\text{H}_{19}\text{N}_2\text{O}_5$ : 319.1288; Found: 319.1308.

(3) The Transformation of 3la.

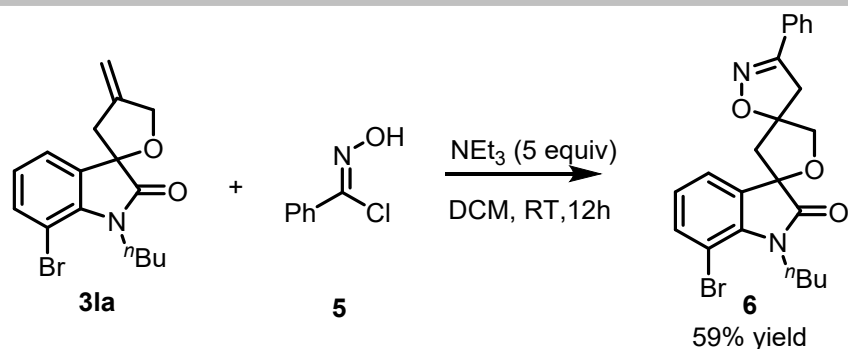

A flame-dried Schlenk tube was charged compound **3la** (52.8 mg, 0.16 mmol) and purged with nitrogen.  $\text{CH}_2\text{Cl}_2$  (1.0 mL) was added via syringe to the reaction tube. A second flame-dried tube was charged with benzaldoxime chloride **5** (123.7 mg, 0.8 mmol, 5.0 equiv.) and  $\text{CH}_2\text{Cl}_2$  (1.0 mL) and purged with nitrogen. Triethylamine (112.0  $\mu\text{L}$ , 0.8 mmol, 5.0 equiv.) was added to the second tube, which was stirred 15 minutes at room temperature. The oxime chloride solution was then transferred to the tube containing **3m** via syringe. The mixture was stirred 12 hours at room temperature. After completion, the reaction mixture was quenched with water and extracted with  $\text{CH}_2\text{Cl}_2$  for three times. The resulted filtrate was separated. The combined organic phase was washed with brine, dried over  $\text{Na}_2\text{SO}_4$  and concentrated under reduced pressure. The crude mixture was purified by silica gel column chromatography (petroleum ether/ethyl acetate= 10:1) to give product **6** as a yellow solid in 59% yield (43.1 mg).

**7-Bromo-1-butyl-3''-phenyl-3'H,4''H,5'H-dispiro[indoline-3,2'-furan-4',5''-isoxazol]-2-one (6)**, Yellow solid. **MP**: 126.9 - 128.6 °C.  **$^1\text{H NMR}$**  (300 MHz,  $\text{CDCl}_3$ )  $\delta$  7.74 - 7.67 (m, 3H), 7.44 - 7.42 (m, 4H), 6.97 (t,  $J = 7.9$  Hz, 1H), 4.44 (q,  $J = 9.6$  Hz, 2H), 4.09 - 4.04 (m, 2H), 3.64 - 3.49 (m, 2H), 2.70 (q,  $J = 14.0$  Hz, 2H), 1.76 - 1.66 (m, 2H), 1.47 - 1.34 (m, 2H), 0.97 (t,  $J = 7.3$  Hz, 3H) ppm.  **$^{13}\text{C NMR}$**  (75 MHz,  $\text{CDCl}_3$ )  $\delta$  178.0, 156.7, 140.4, 135.8, 133.0, 130.4, 129.2, 128.8, 126.6, 124.8, 124.7, 102.2, 93.1, 82.3, 78.8, 47.2, 41.1, 40.9, 31.6, 19.8, 13.8 ppm. **HRMS** (ESI)  $m/z$ :  $[\text{M}+\text{H}]^+$  calcd for  $\text{C}_{23}\text{H}_{24}\text{BrN}_2\text{O}_3$  455.0965; Found 455.0998.



## 4. Screening Asymmetric Reaction Conditions

**Table S1.** Selected Screening Asymmetric Reaction Conditions of **1d** and **2** <sup>a</sup>

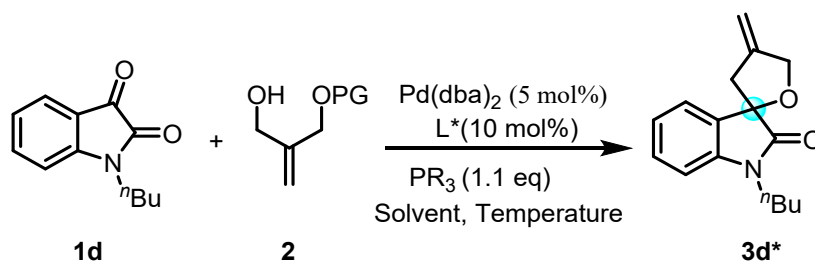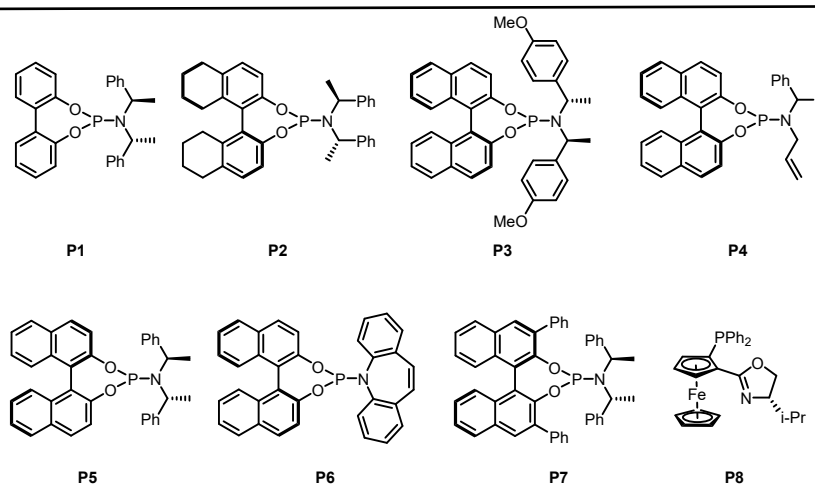

| entry | PG  | L*        | PR <sub>3</sub>                   | Solvent | T(°C)  | yield <sup>b</sup> | ee <sup>c</sup> |
|-------|-----|-----------|-----------------------------------|---------|--------|--------------------|-----------------|
| 1     | Boc | <b>P1</b> | P(NMe <sub>2</sub> ) <sub>3</sub> | DCM     | -78-rt | 34%                | 25%             |
| 2     | Boc | <b>P2</b> | P(NMe <sub>2</sub> ) <sub>3</sub> | DCM     | -78-rt | 50%                | 40%             |
| 3     | Boc | <b>P3</b> | P(NMe <sub>2</sub> ) <sub>3</sub> | DCM     | -78-rt | 82%                | 38%             |
| 4     | Boc | <b>P4</b> | P(NMe <sub>2</sub> ) <sub>3</sub> | DCM     | -78-rt | 59%                | 38%             |
| 5     | Boc | <b>P5</b> | P(NMe <sub>2</sub> ) <sub>3</sub> | DCM     | -78-rt | 87%                | 31%             |
| 6     | Boc | <b>P6</b> | P(NMe <sub>2</sub> ) <sub>3</sub> | DCM     | -78-rt | 83%                | 5%              |
| 7     | Boc | <b>P7</b> | P(NMe <sub>2</sub> ) <sub>3</sub> | DCM     | -78-rt | ND <sup>[d]</sup>  | -               |
| 8     | Boc | <b>P8</b> | P(NMe <sub>2</sub> ) <sub>3</sub> | DCM     | -78-rt | ND                 | -               |
| 9     | Boc | <b>P5</b> | P(NMe <sub>2</sub> ) <sub>3</sub> | DCE     | -35-rt | trace              | -               |

|                 |                                        |           |                                   |                    |        |       |     |
|-----------------|----------------------------------------|-----------|-----------------------------------|--------------------|--------|-------|-----|
| 10              | Boc                                    | <b>P5</b> | P(NMe <sub>2</sub> ) <sub>3</sub> | CH <sub>3</sub> CN | -40-rt | 59%   | 18% |
| 11              | Boc                                    | <b>P5</b> | P(NMe <sub>2</sub> ) <sub>3</sub> | HCCl <sub>3</sub>  | -60-rt | ND    | -   |
| 12              | Boc                                    | <b>P5</b> | P(NMe <sub>2</sub> ) <sub>3</sub> | THF                | -78-rt | ND    | -   |
| 13              | Boc                                    | <b>P5</b> | P(NMe <sub>2</sub> ) <sub>3</sub> | Et <sub>2</sub> O  | -78-rt | trace | -   |
| 14              | Boc                                    | <b>P5</b> | P(NMe <sub>2</sub> ) <sub>3</sub> | CH <sub>3</sub> OH | -78-rt | 17%   | 27% |
| 15              | Boc                                    | <b>P5</b> | P(NMe <sub>2</sub> ) <sub>3</sub> | EA                 | -78-rt | 17%   | rac |
| 16              | Boc                                    | <b>P5</b> | P(NMe <sub>2</sub> ) <sub>3</sub> | toluene            | -78-rt | trace | -   |
| 17              | Boc                                    | <b>P5</b> | P(NMe <sub>2</sub> ) <sub>3</sub> | <i>n</i> -hexane   | -78-rt | trace | -   |
| 18              | Boc                                    | <b>P5</b> | P(NEt <sub>2</sub> ) <sub>3</sub> | DCM                | -78-rt | 42%   | 22% |
| 19 <sup>d</sup> | Boc                                    | <b>P5</b> | P(pyrrolidinyl) <sub>3</sub>      | DCM                | -78-rt | 67%   | 12% |
| 20              | Boc                                    | <b>P5</b> | P(OMe) <sub>3</sub>               | DCM                | -78-rt | ND    | -   |
| 21              | CO <sub>2</sub> <sup><i>i</i></sup> Pr | <b>P5</b> | P(NMe <sub>2</sub> ) <sub>3</sub> | DCM                | -78-rt | 10%   | 41% |
| 22              | CO <sub>2</sub> Bn                     | <b>P5</b> | P(NMe <sub>2</sub> ) <sub>3</sub> | DCM                | -78-rt | 14%   | 31% |
| 23              | CO <sub>2</sub> Me                     | <b>P5</b> | P(NMe <sub>2</sub> ) <sub>3</sub> | DCM                | -78-rt | 69%   | 18% |
| 24              | COMe                                   | <b>P5</b> | P(NMe <sub>2</sub> ) <sub>3</sub> | DCM                | -78-rt | 18%   | 40% |

<sup>a</sup> Conducted with **1d** (0.1 mmol), **2** (0.2 mmol), [Pd] (5 mol %), ligand (10 mol %) in solvent (1.0 mL) at corresponding temperature under N<sub>2</sub> atmosphere.

<sup>b</sup> Isolated yield.

<sup>c</sup> Determined by HPLC analysis using a chiral stationary phase.

<sup>d</sup> ND = no detected.

**HPLC acquisition parameters:** Chiral column: CHIRALCEL® AD-H, Wave length: 254 nm, Mobile phase: iPrOH:Hex=3:97, Flow rate: 1mL/min

HPLC Spectra of racemic **3d**\*

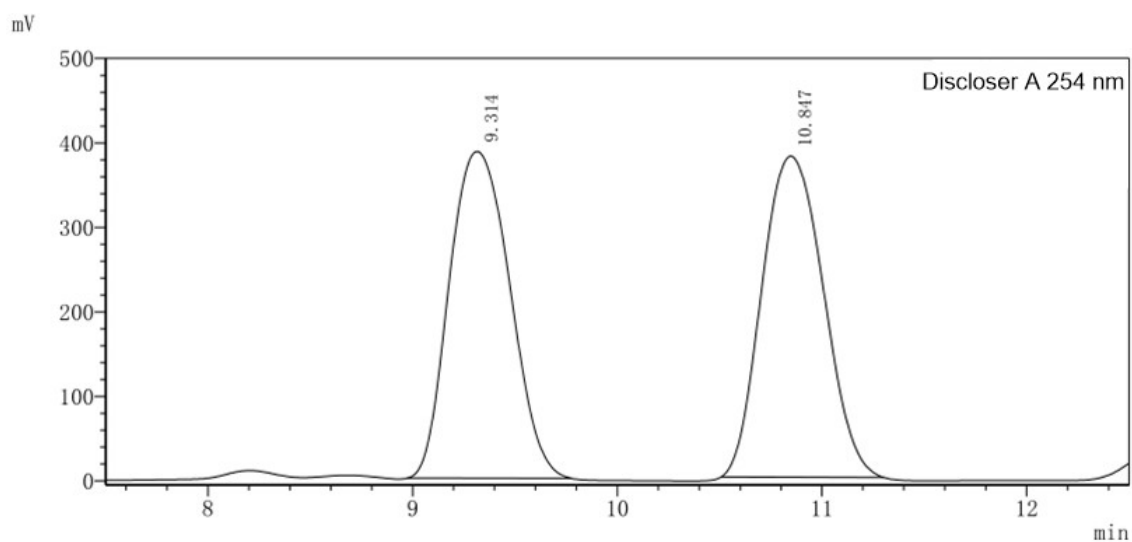

Discloser A 254 nm

| Peak  | Reten time (min) | Area(%) |
|-------|------------------|---------|
| 1     | 9.314            | 50.033  |
| 2     | 10.847           | 49.967  |
| total |                  | 100     |

HPLC Spectra of enantiomeric **3d**\* using **P1**

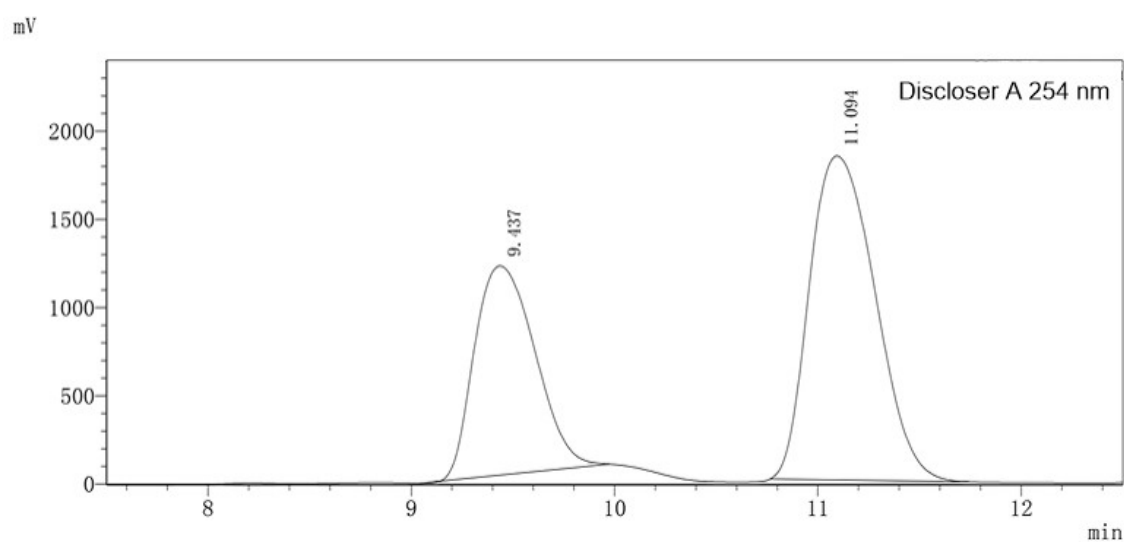

Discloser A 254 nm

| Peak  | Reten time (min) | Area(%) |
|-------|------------------|---------|
| 1     | 9.437            | 37.341  |
| 2     | 11.094           | 62.659  |
| total |                  | 100     |

### HPLC Spectra of enantiomeric **3d\*** using **P2**

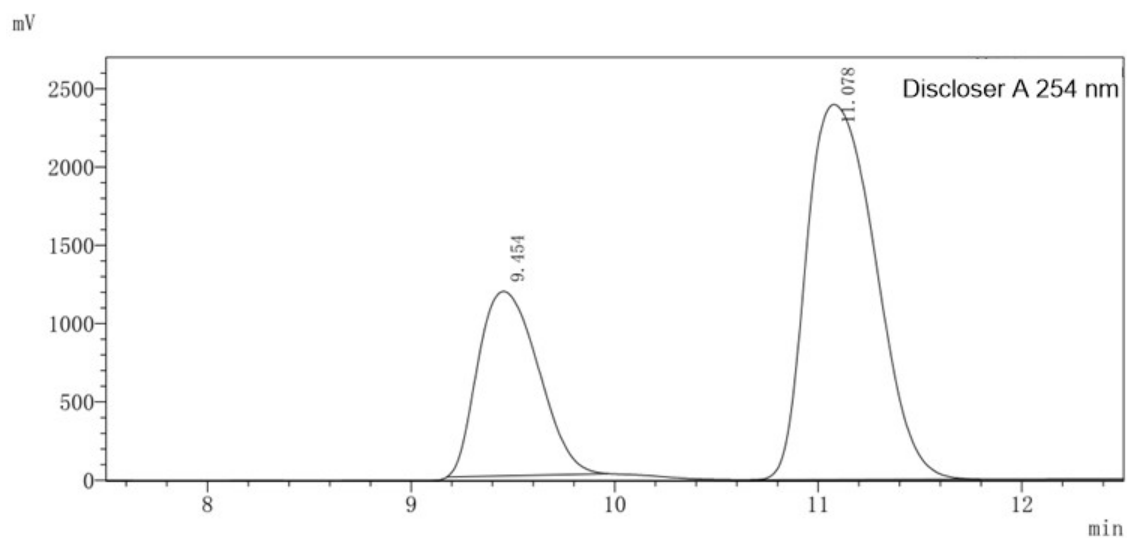

Discloser A 254 nm

| Peak  | Reten time (min) | Area(%) |
|-------|------------------|---------|
| 1     | 9.454            | 30.127  |
| 2     | 11.078           | 69.873  |
| total |                  | 100     |

### HPLC Spectra of enantiomeric **3d\*** using **P3**

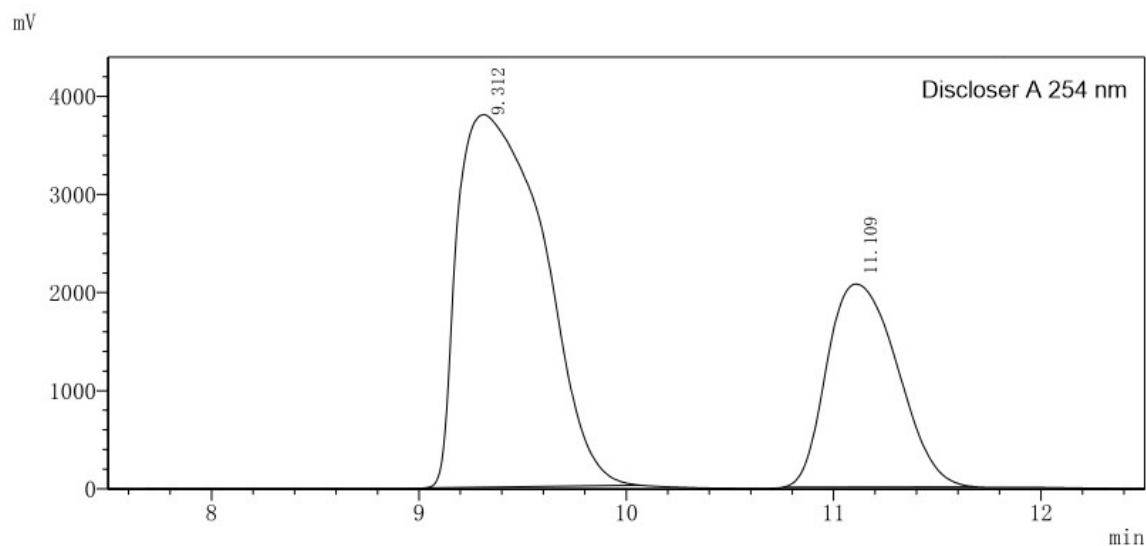

Discloser A 254 nm

| Peak  | Reten time (min) | Area(%) |
|-------|------------------|---------|
| 1     | 9.312            | 69.167  |
| 2     | 11.109           | 30.833  |
| total |                  | 100     |

### HPLC Spectra of enantiomeric **3d\*** using **P4**

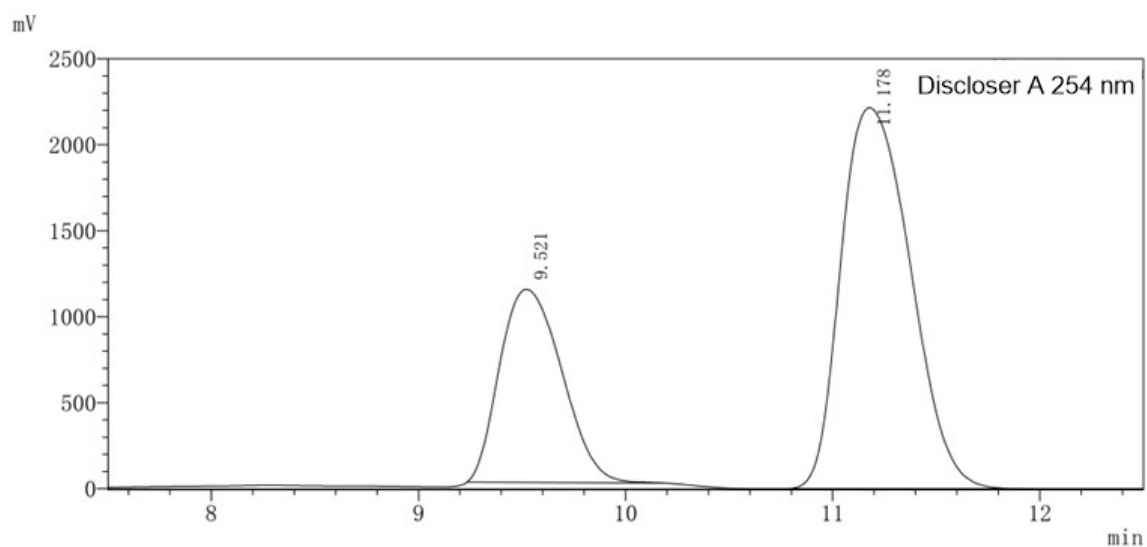

Discloser A 254 nm

| Peak  | Reten time (min) | Area(%) |
|-------|------------------|---------|
| 1     | 9.521            | 31.196  |
| 2     | 11.178           | 68.804  |
| total |                  | 100     |

### HPLC Spectra of enantiomeric **3d\*** using **P5**

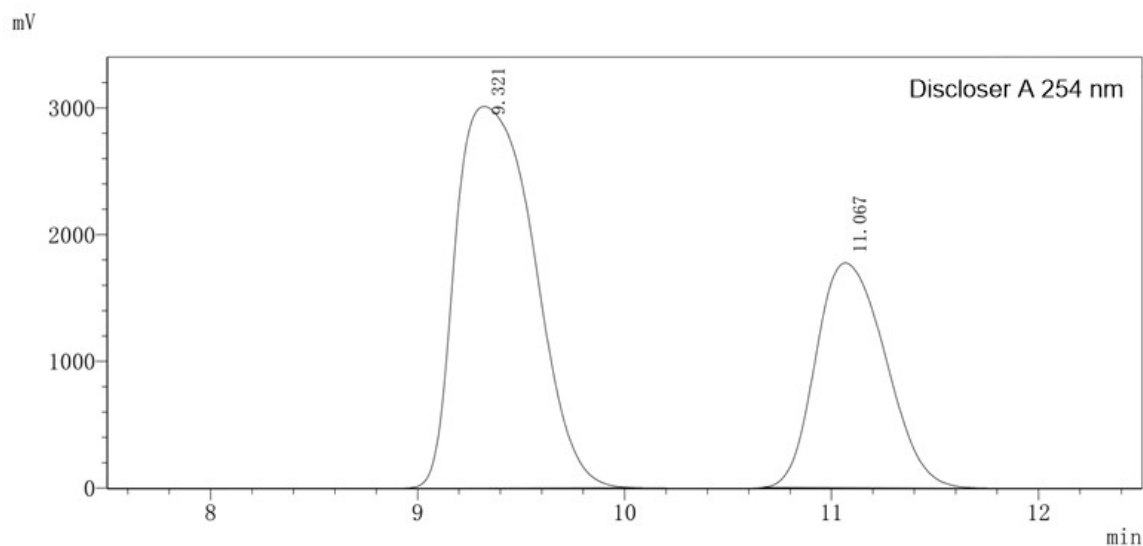

Discloser A 254 nm

| Peak  | Reten time (min) | Area(%) |
|-------|------------------|---------|
| 1     | 9.321            | 65.651  |
| 2     | 11.067           | 34.349  |
| total |                  | 100     |

## HPLC Spectra of enantiomeric **3d**\* using **P6**

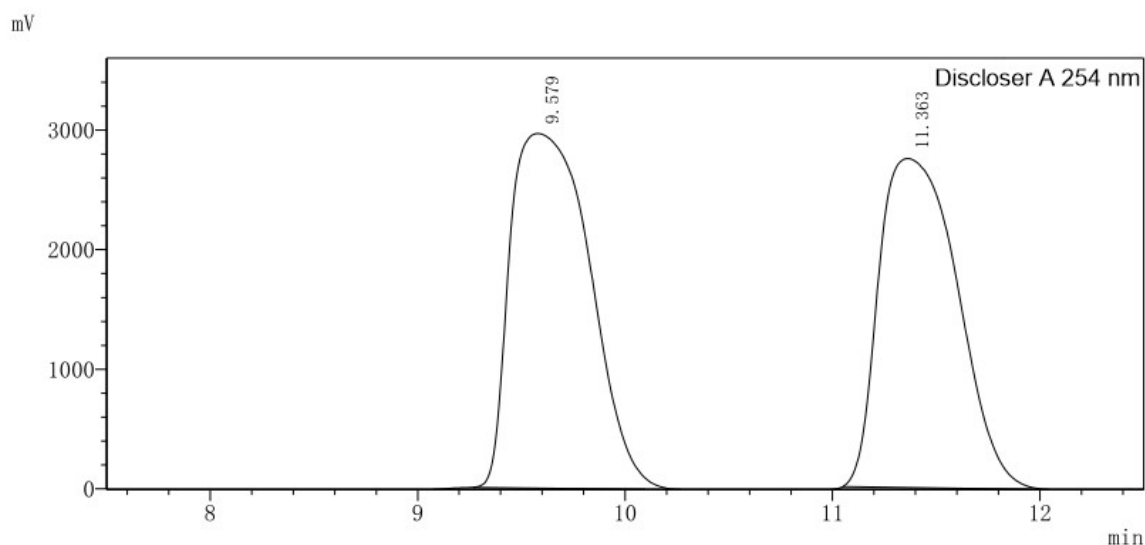

Discloser A 254 nm

| Peak  | Reten time (min) | Area(%) |
|-------|------------------|---------|
| 1     | 9.579            | 52.272  |
| 2     | 11.363           | 47.728  |
| total |                  | 100     |

## 5. Reference

- [1] a) Feng Shi, Zhonglin Tao, *Chem. Eur. J.* **2012**, *18*, 6885-6894; b) Ping Zhao, Yanzhong Li, *Eur. J. Med. Chem.* **2014**, *86*, 165-174; c) Jie Zheng, Yujin Li, *Tetrahedron.* **2015**, *71*, 3802-3809.
- [2] a) Zhengbo Yuan, Rui Pan, *Adv. Synth. Catal.* **2017**, *359*, 4244-4249; b) Barry M. Trost, Guillaume Mata, *Angew. Chem. Int. Ed.* **2018**, *57*, 12333-12337.

## 6. X-Ray single crystal data of product **3i**

The X-ray crystallographic structures for **3i**. ORTEP view of the molecules of complex **3i**, showing ellipsoids at 30% probability level. Crystal data have been deposited to CCDC, number **3i (2127377)**.

A summary of the fundamental crystal and refinement data are given in the Table S2 of the Supporting Information. Atomic coordinates, anisotropic displacement parameters and bond lengths and angles can be found in the cif files.

Yellow crystals suitable for X-ray diffraction (Gemini E) were grown by n-hexane/dichloromethane solution of **3i** inside a penicillin bottle.

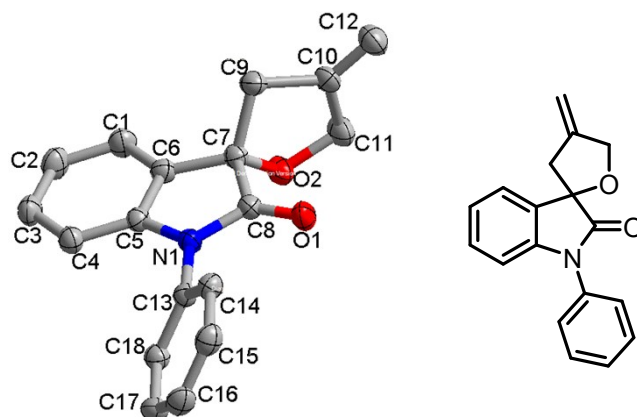

Crystal structure of **3i** (CCDC 2127377)

**Table S2 Crystal data and structure refinement for 3i.**

|                                    |                                                 |
|------------------------------------|-------------------------------------------------|
| Identification code                | <b>3i</b>                                       |
| Empirical formula                  | C <sub>18</sub> H <sub>15</sub> NO <sub>2</sub> |
| Formula weight                     | 277.31                                          |
| Temperature/K                      | 293(2)                                          |
| Crystal system                     | monoclinic                                      |
| Space group                        | C2/c                                            |
| a/Å                                | 27.2600(5)                                      |
| b/Å                                | 5.69779(8)                                      |
| c/Å                                | 18.9861(4)                                      |
| α/°                                | 90                                              |
| β/°                                | 107.276(2)                                      |
| γ/°                                | 90                                              |
| Volume/Å <sup>3</sup>              | 2815.92(9)                                      |
| Z                                  | 8                                               |
| ρ <sub>calc</sub> /cm <sup>3</sup> | 1.308                                           |
| μ/mm <sup>-1</sup>                 | 0.684                                           |
| F(000)                             | 1168.0                                          |
| Crystal size/mm <sup>3</sup>       | 0.17 × 0.1 × 0.04                               |
| Radiation                          | CuKα (λ = 1.54184)                              |

---

|                                                  |                                                                  |
|--------------------------------------------------|------------------------------------------------------------------|
| 2 $\theta$ range for data collection/ $^{\circ}$ | 6.792 to 141.622                                                 |
| Index ranges                                     | $-32 \leq h \leq 32$ , $-6 \leq k \leq 6$ , $-23 \leq l \leq 20$ |
| Reflections collected                            | 9601                                                             |
| Independent reflections                          | 2674 [ $R_{\text{int}} = 0.0261$ , $R_{\text{sigma}} = 0.0215$ ] |
| Data/restraints/parameters                       | 2674/0/190                                                       |
| Goodness-of-fit on $F^2$                         | 1.023                                                            |
| Final R indexes [ $I \geq 2\sigma(I)$ ]          | $R_1 = 0.0419$ , $wR_2 = 0.1078$                                 |
| Final R indexes [all data]                       | $R_1 = 0.0505$ , $wR_2 = 0.1160$                                 |
| Largest diff. peak/hole / $e \text{ \AA}^{-3}$   | 0.18/-0.21                                                       |



## 7. Copies of $^1\text{H}$ NMR, $^{13}\text{C}$ NMR spectra

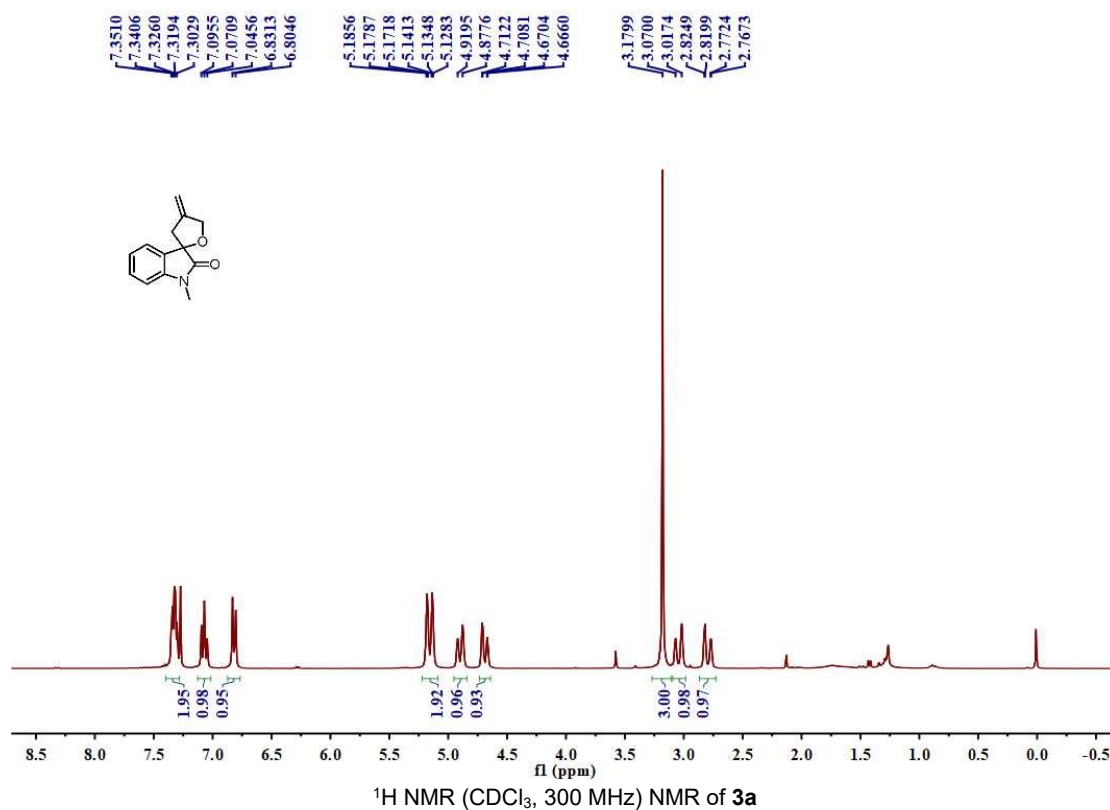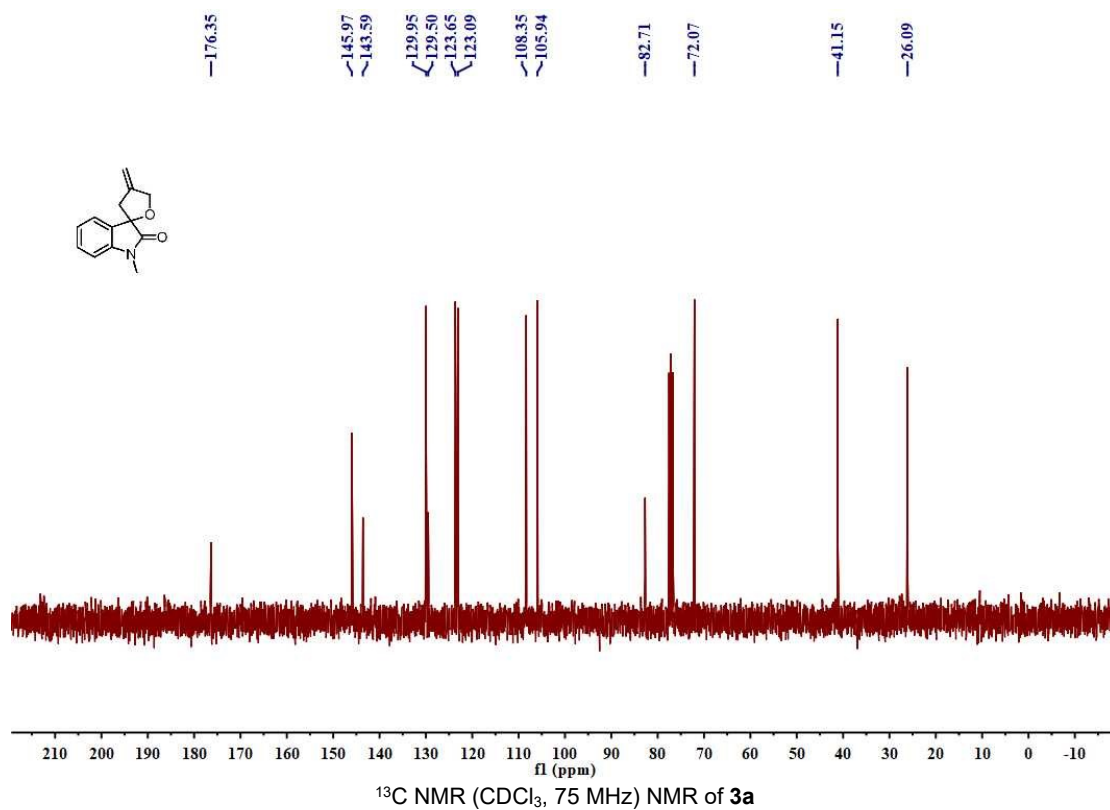

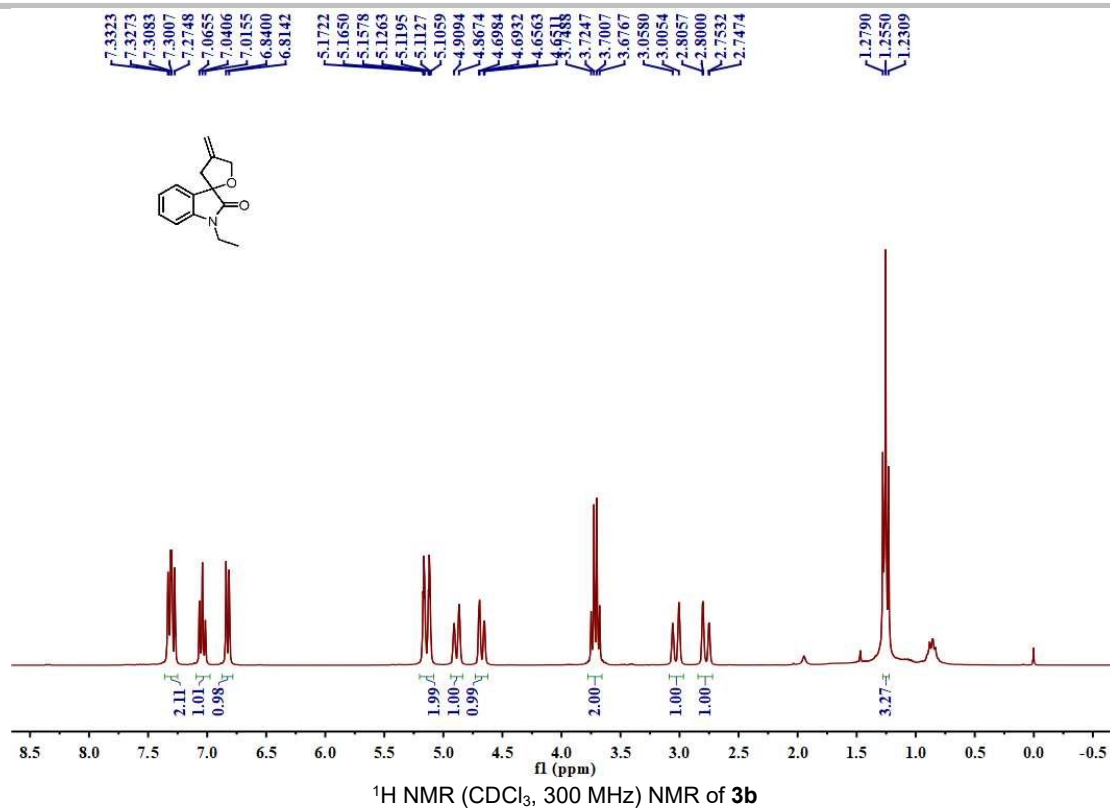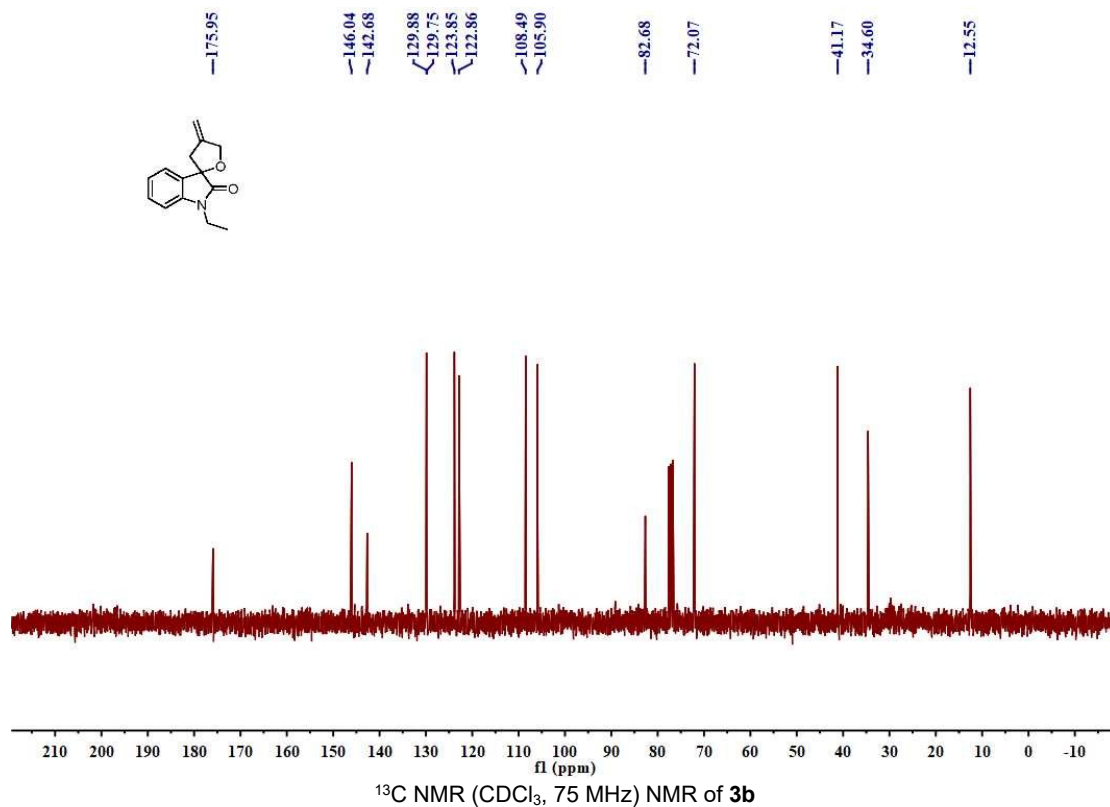

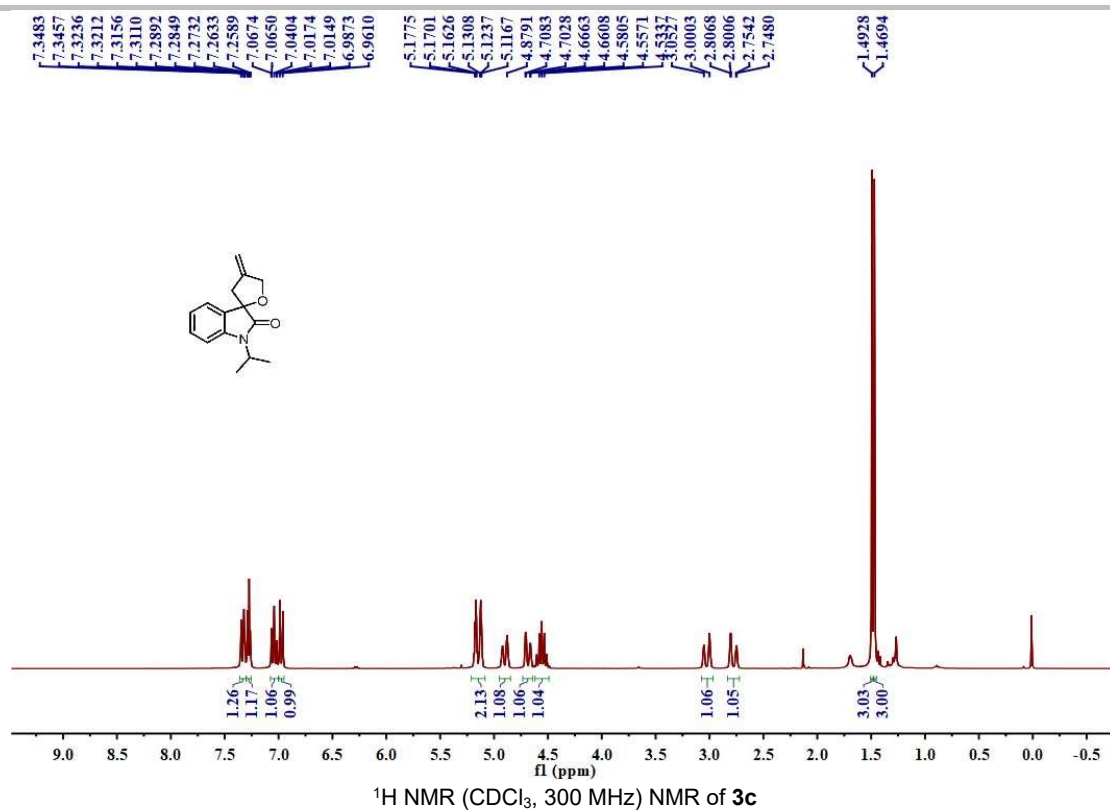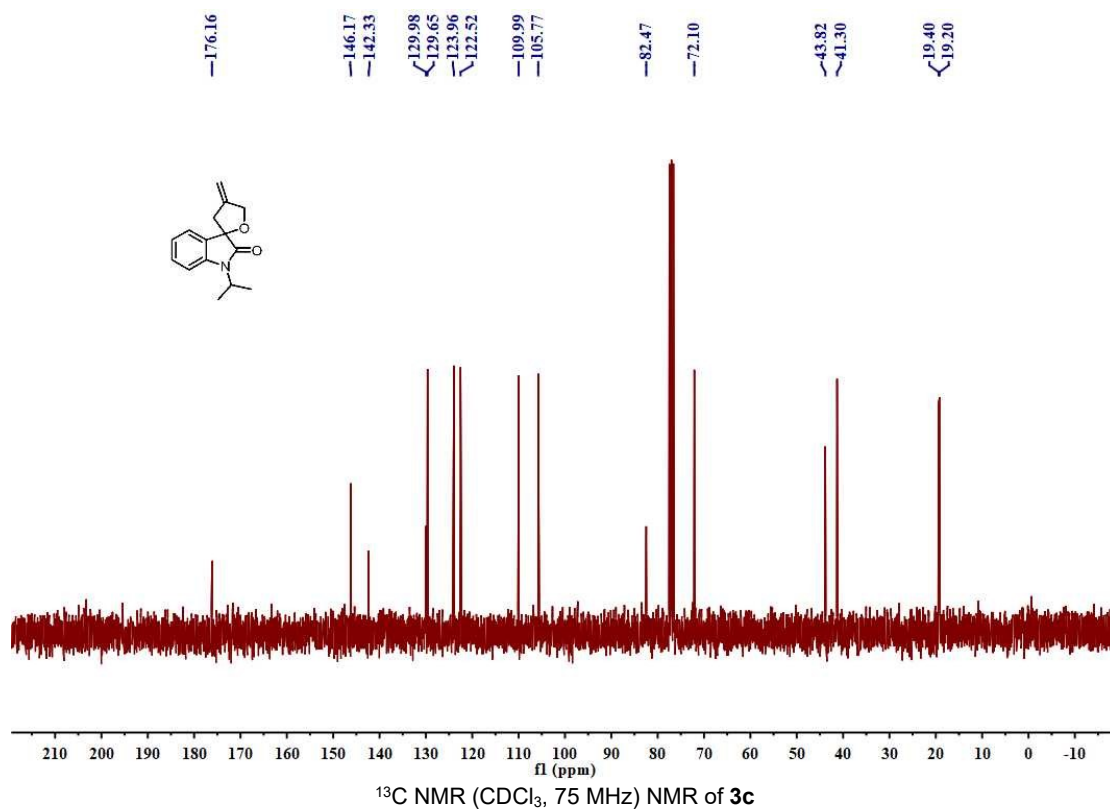

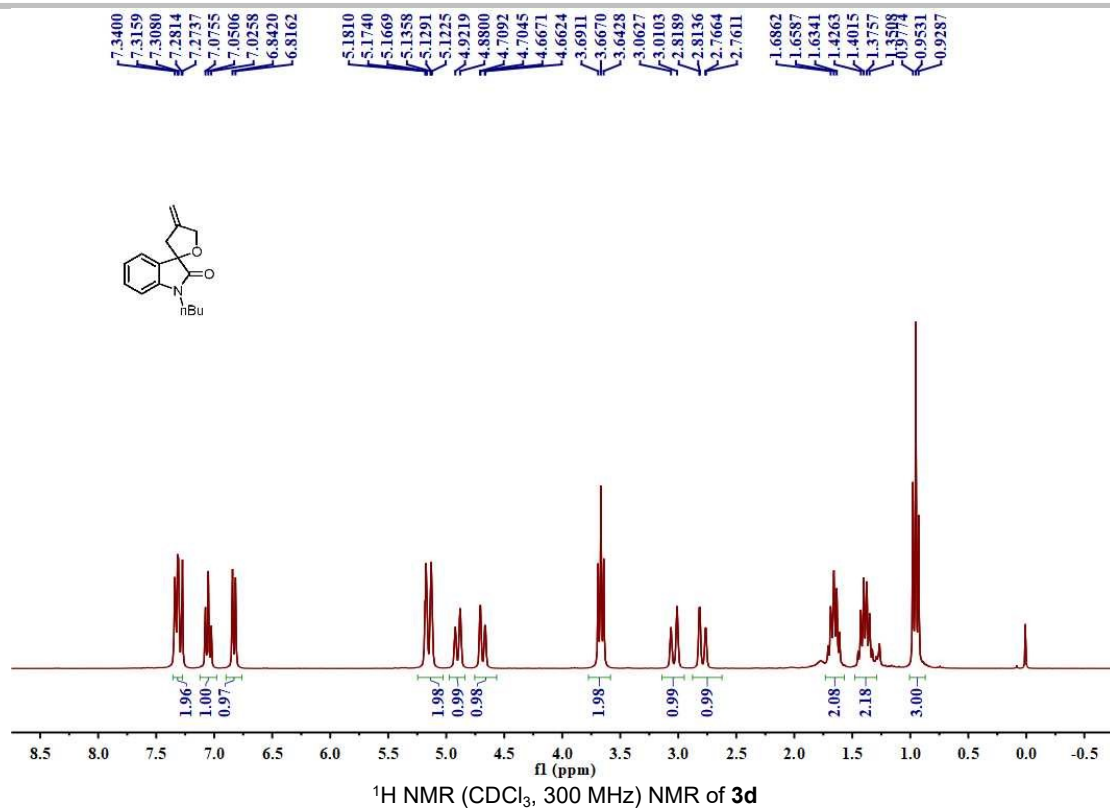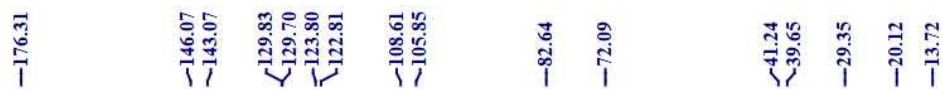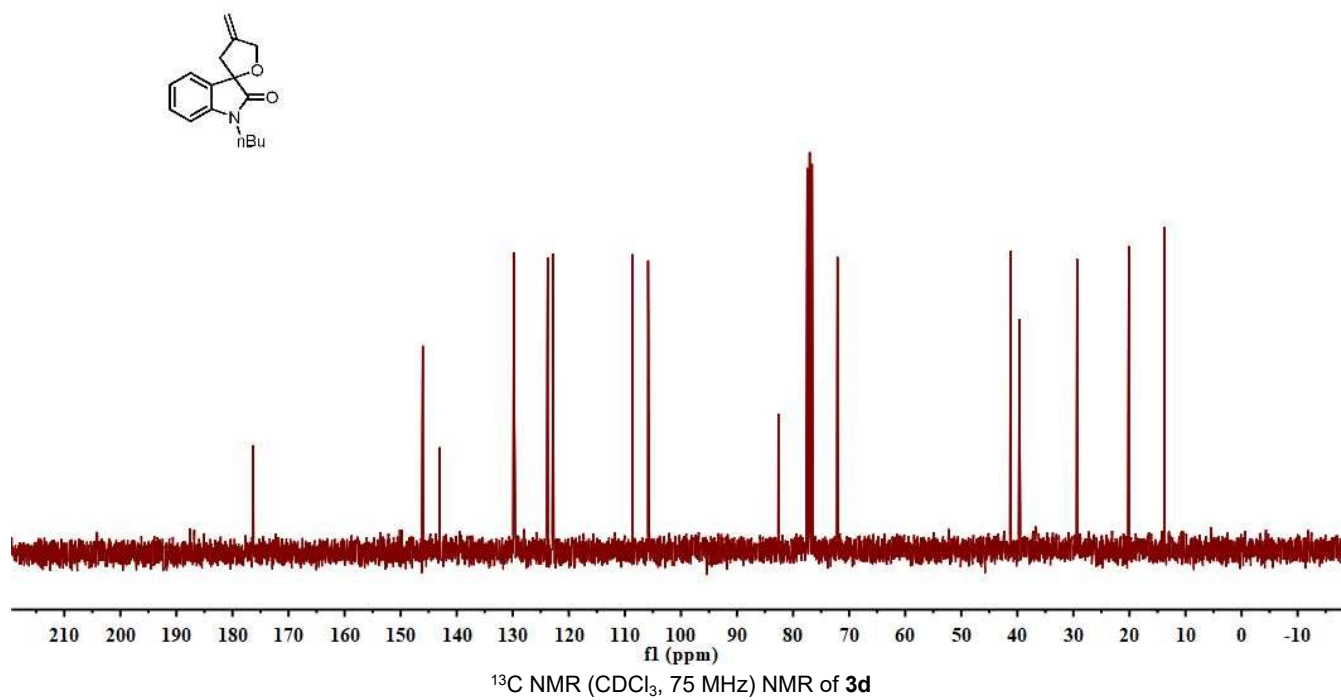

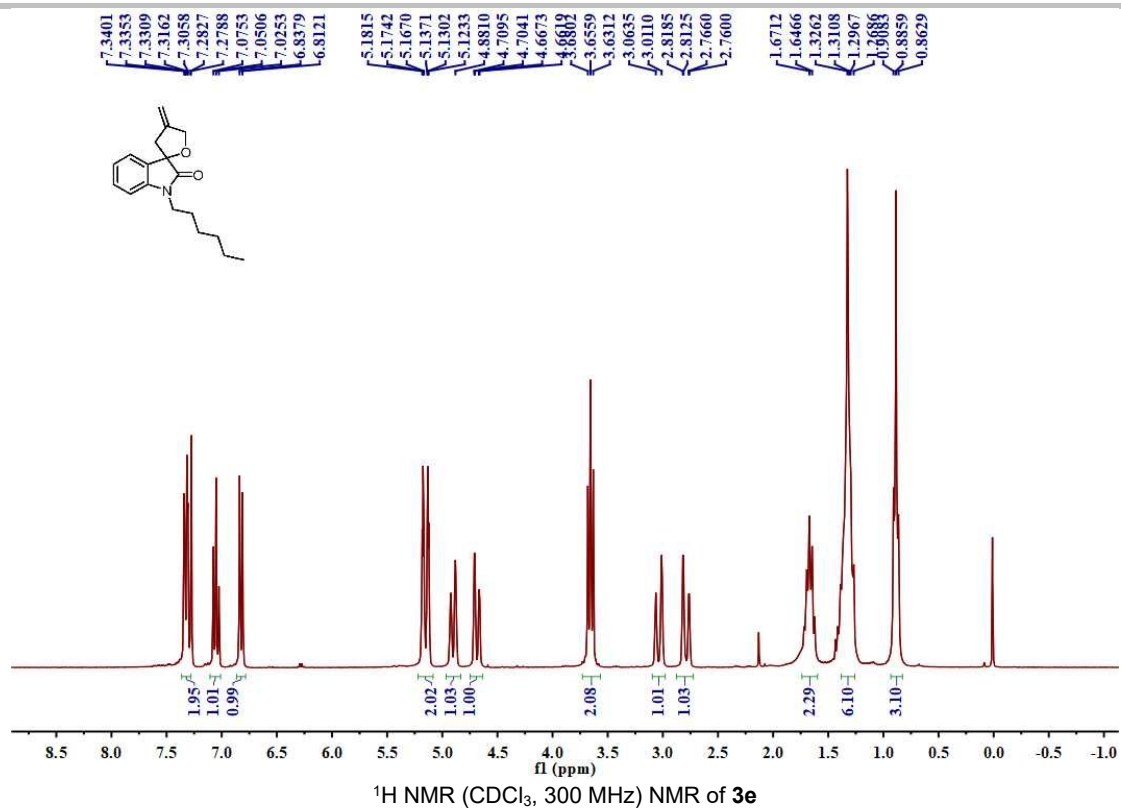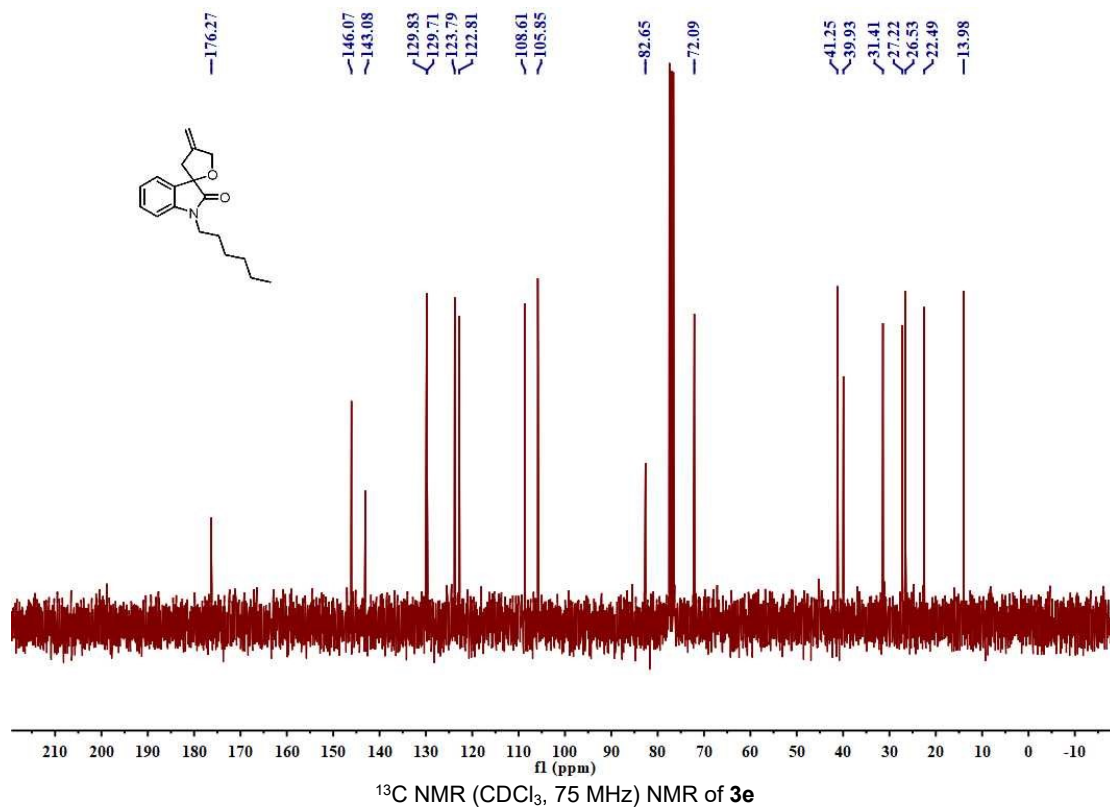

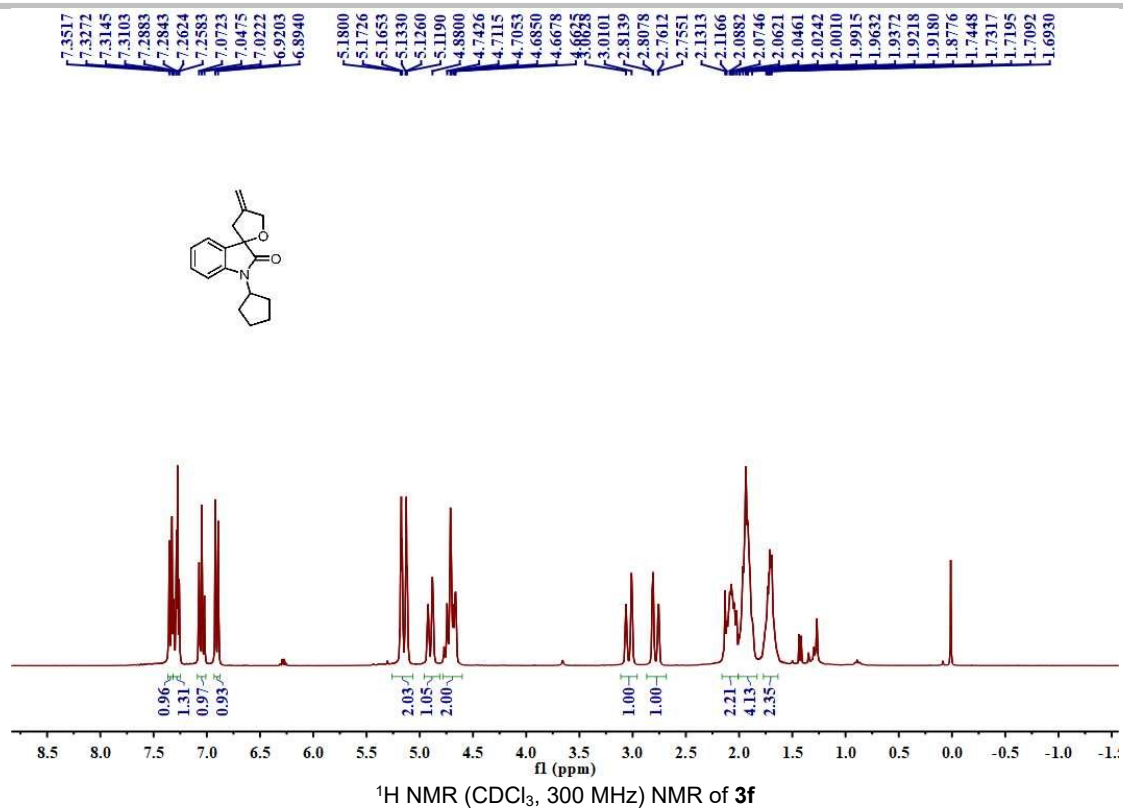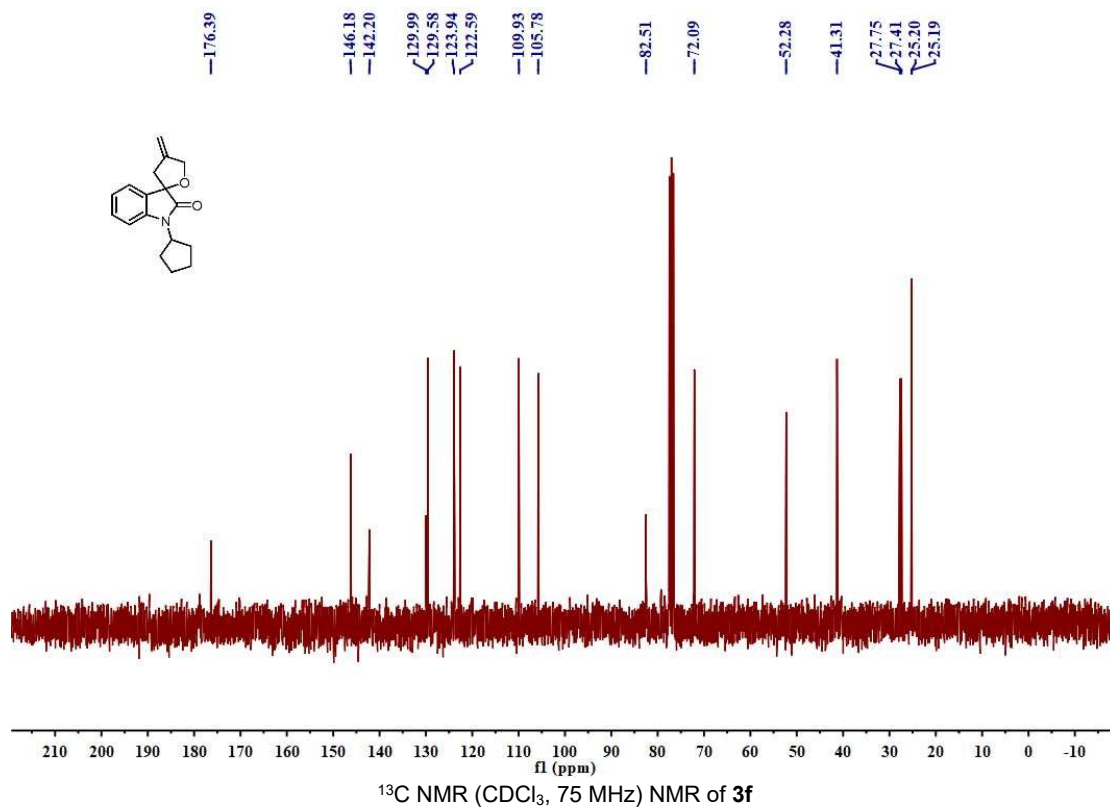

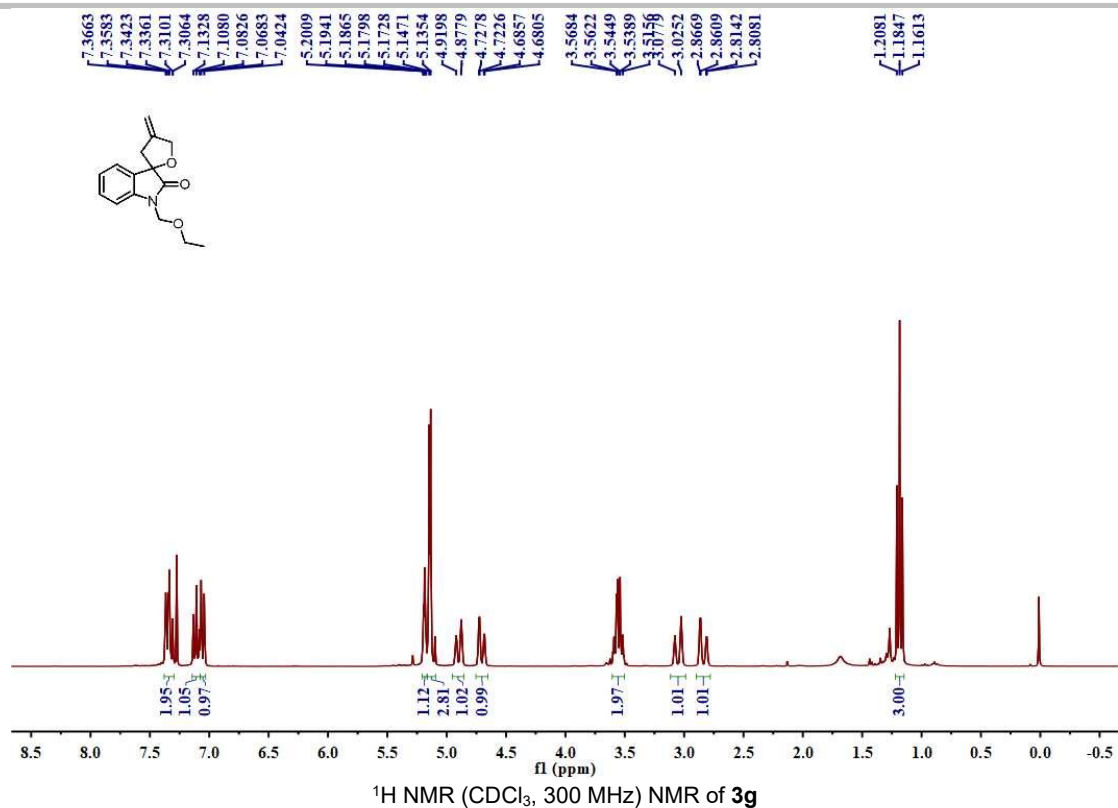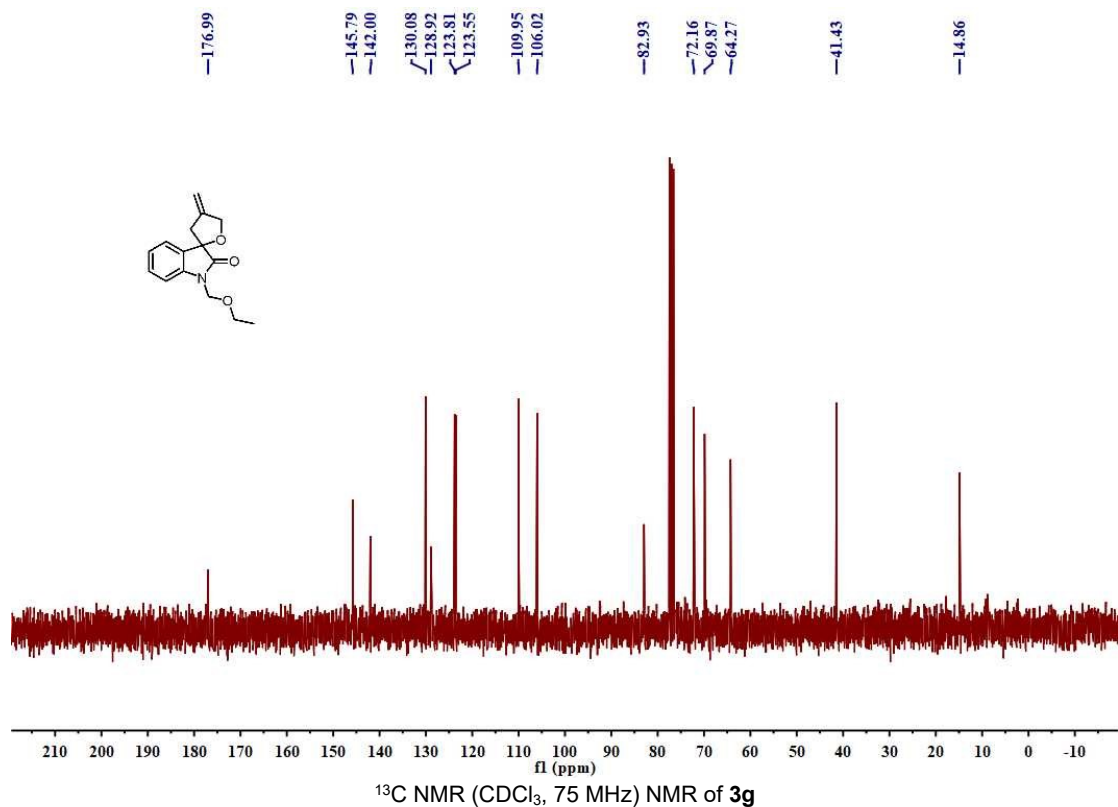

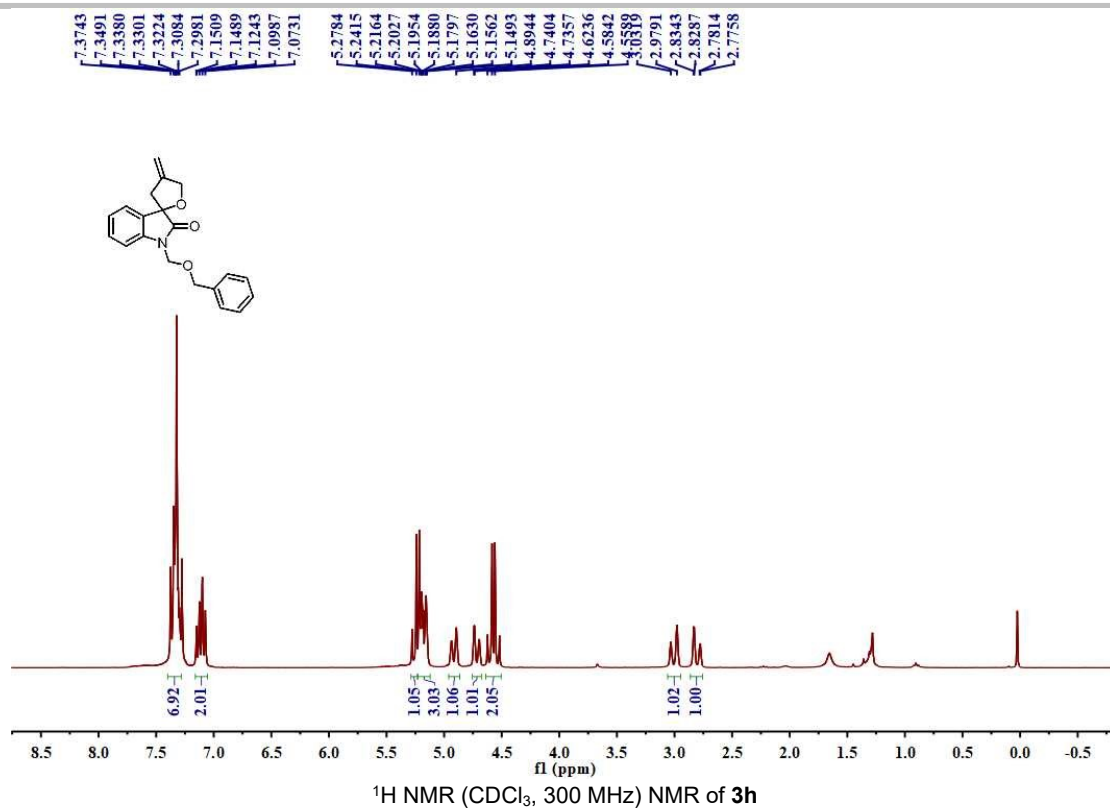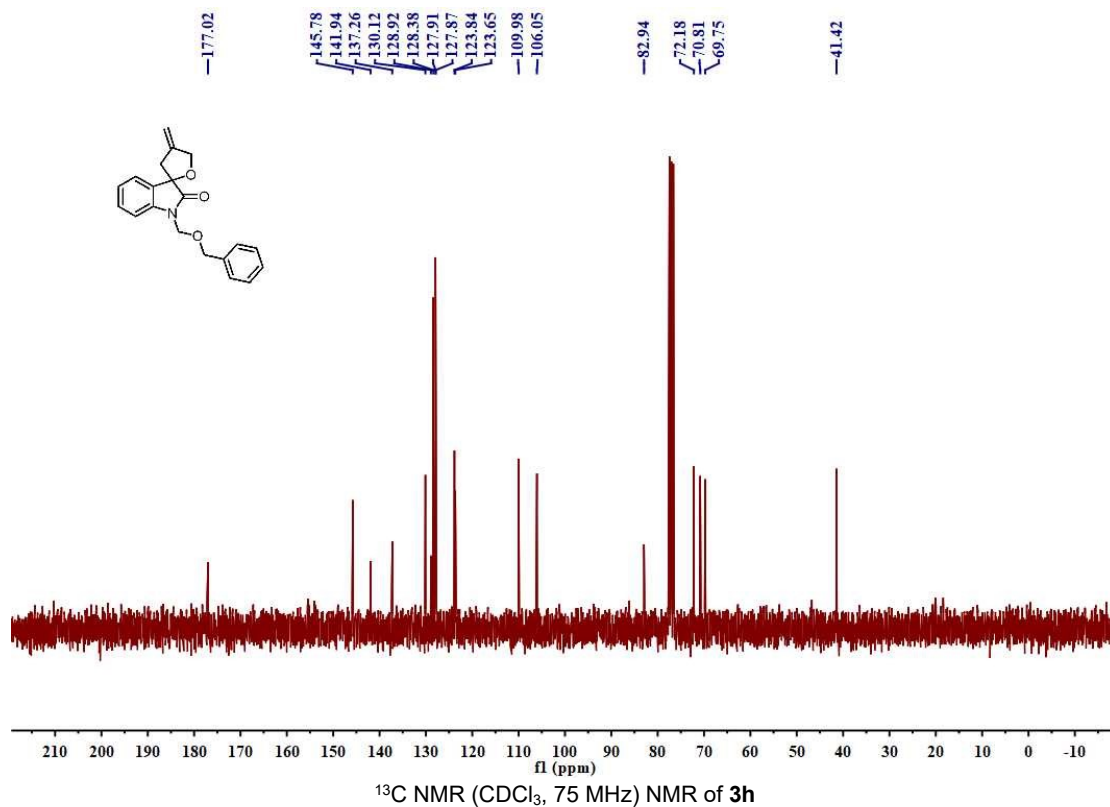



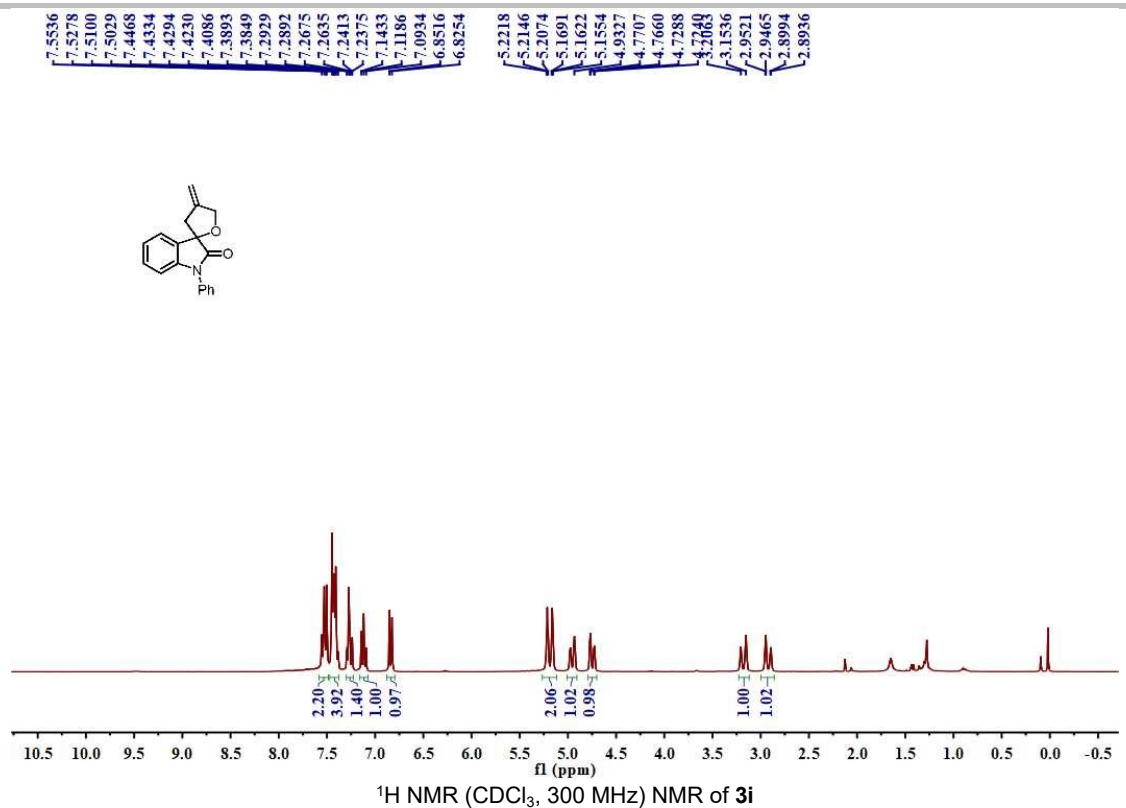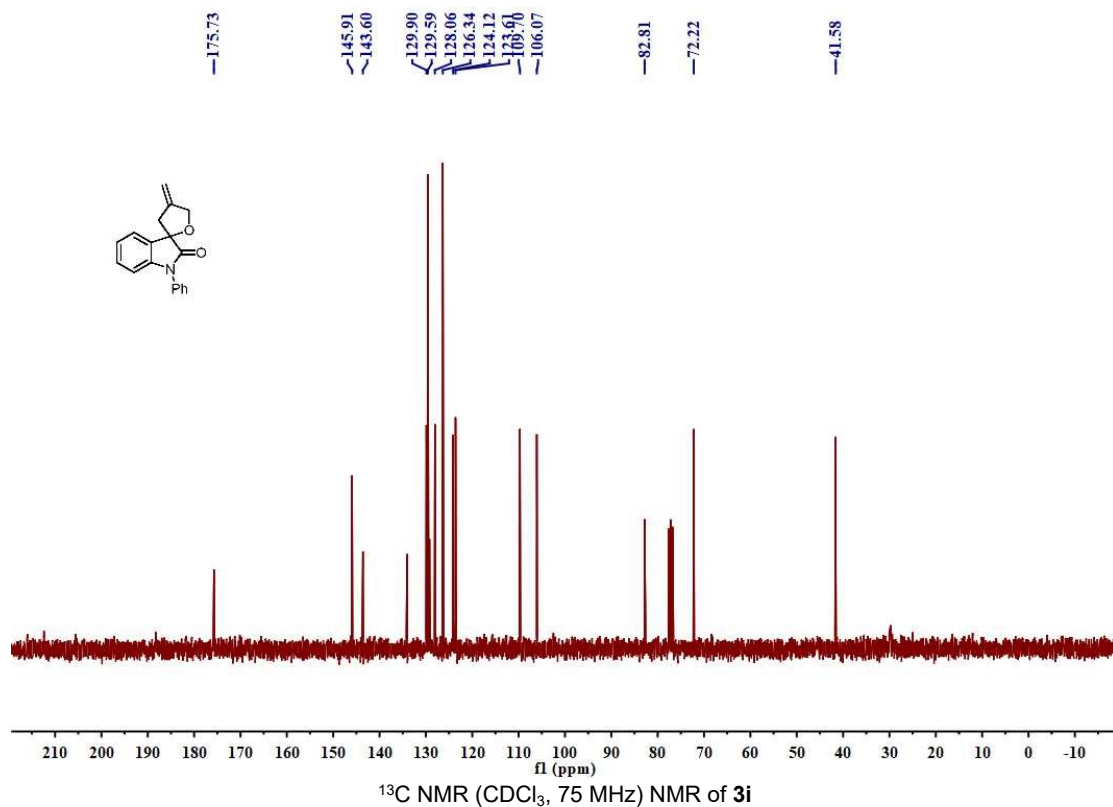

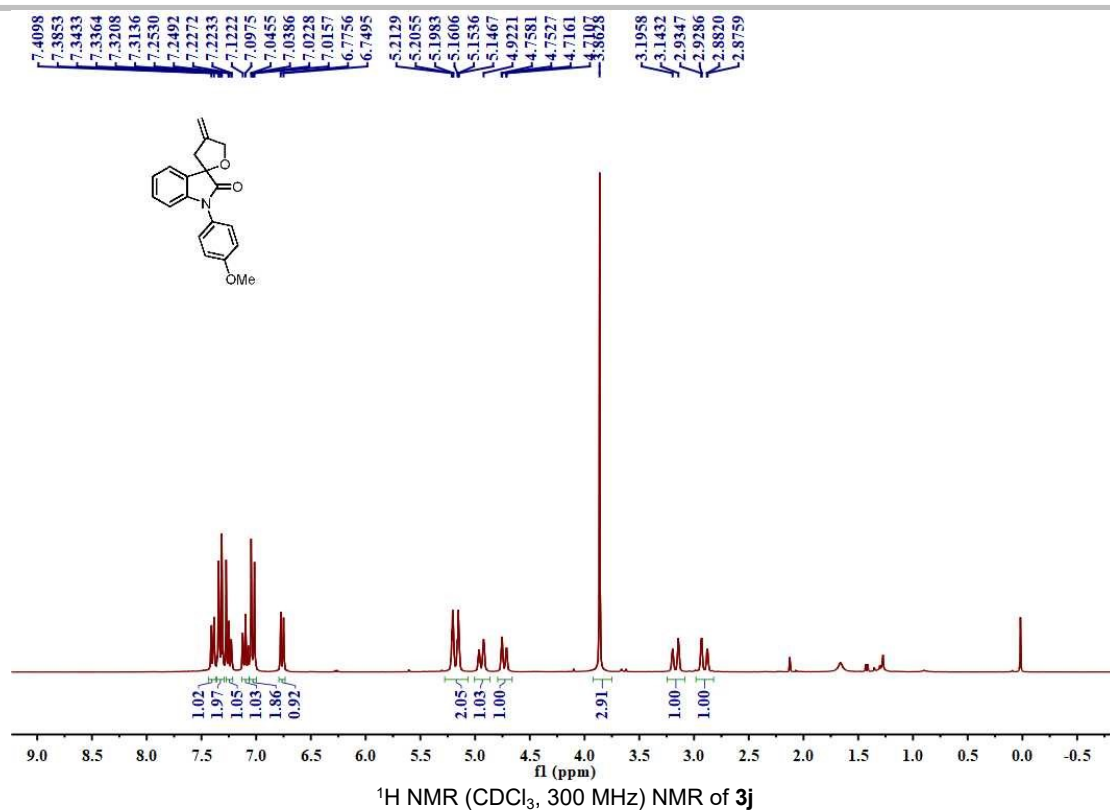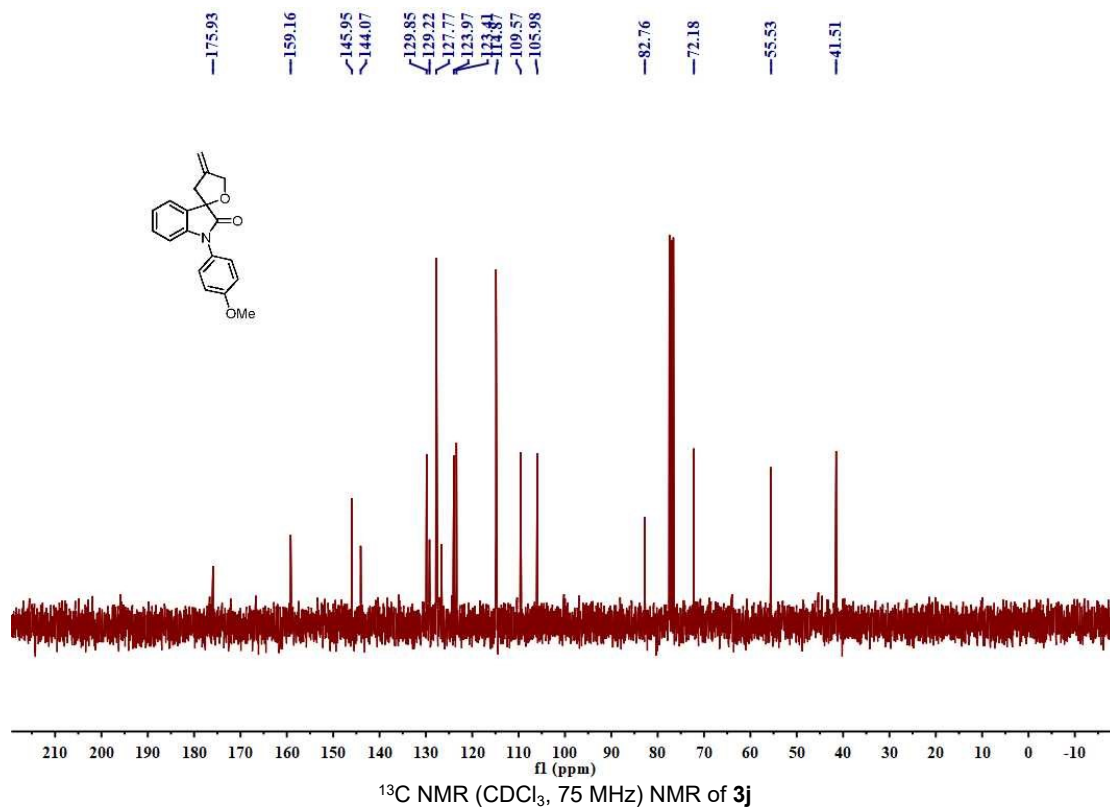

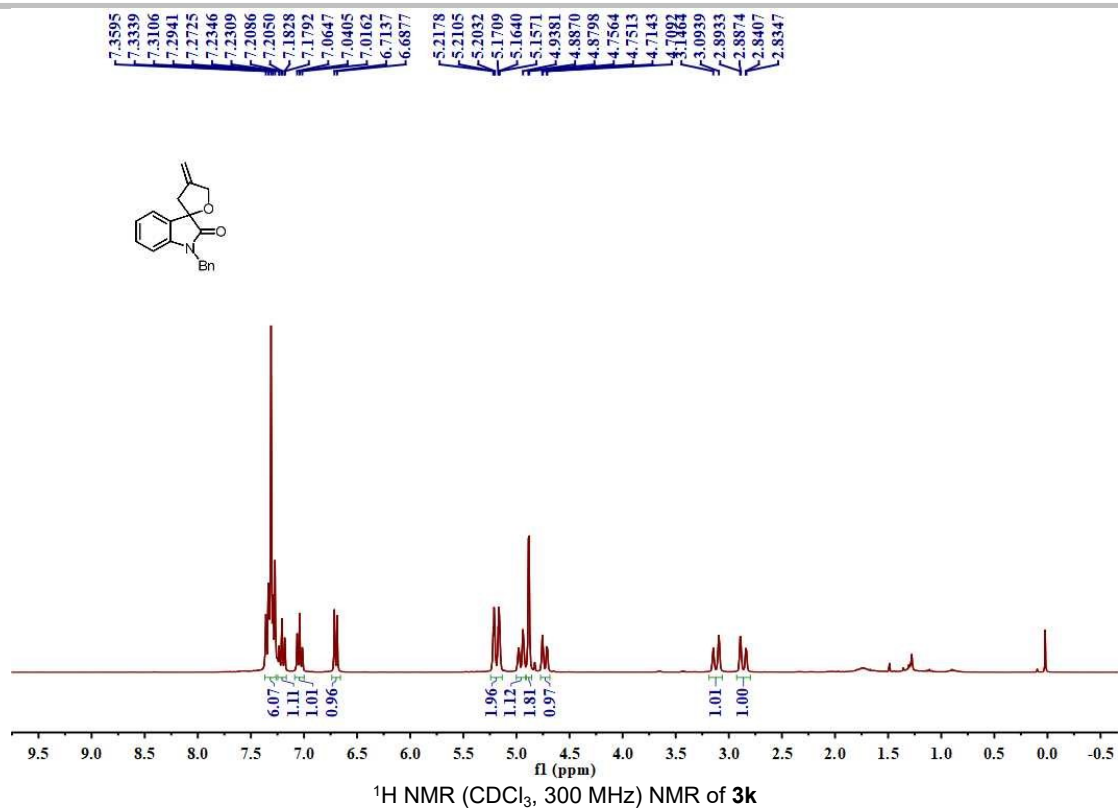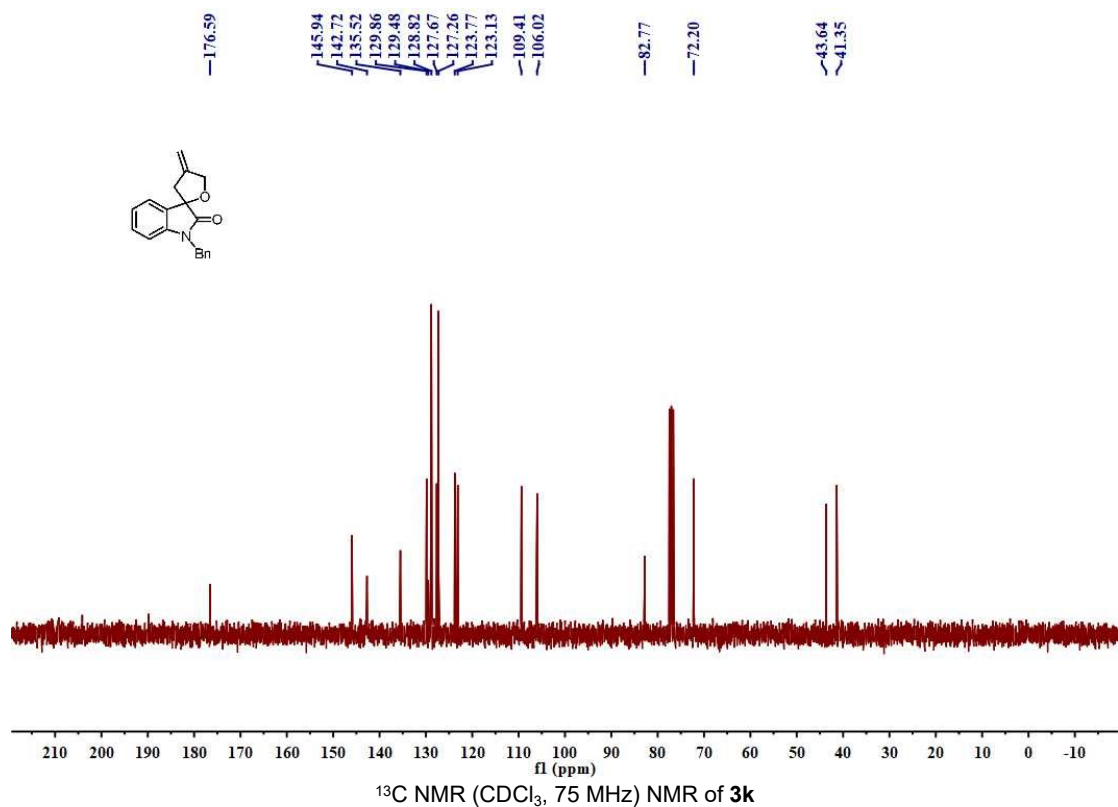

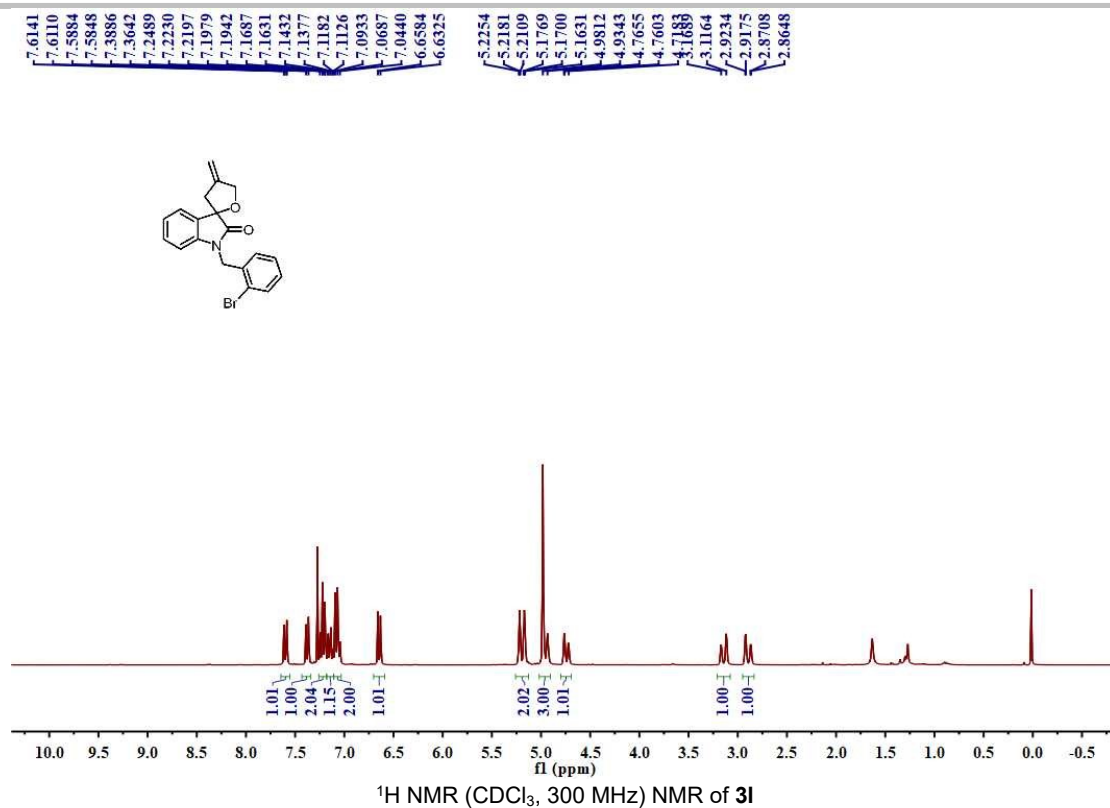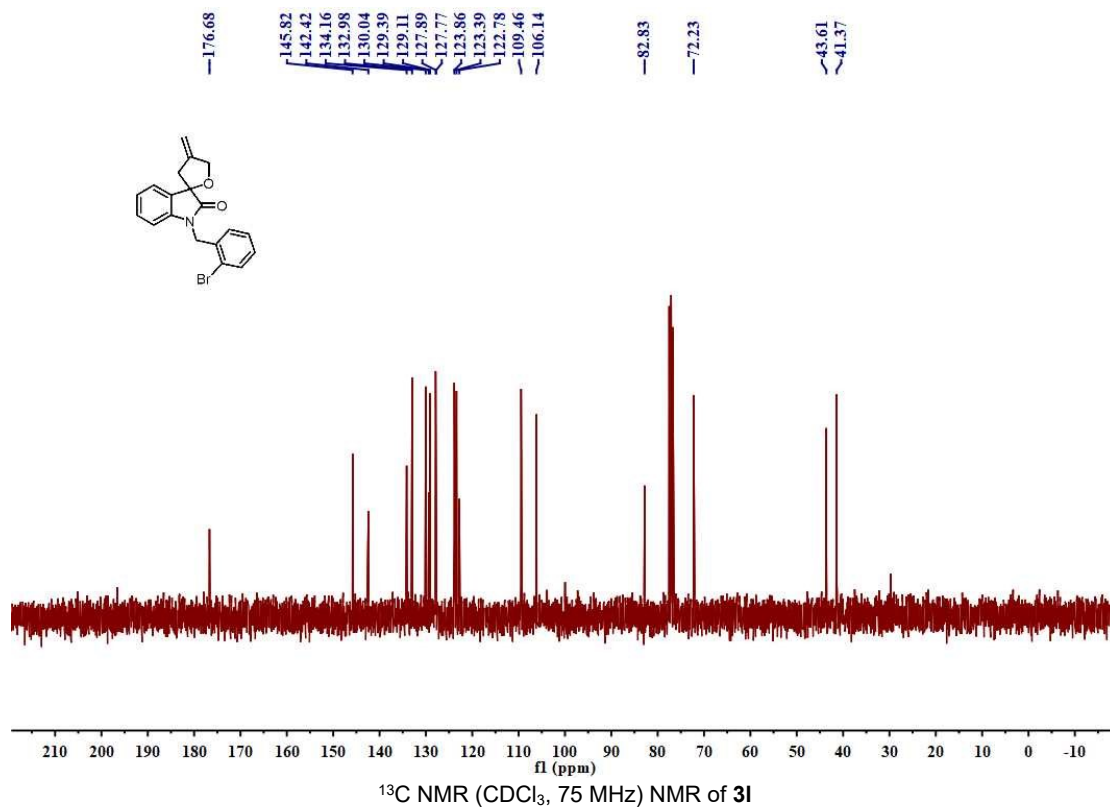

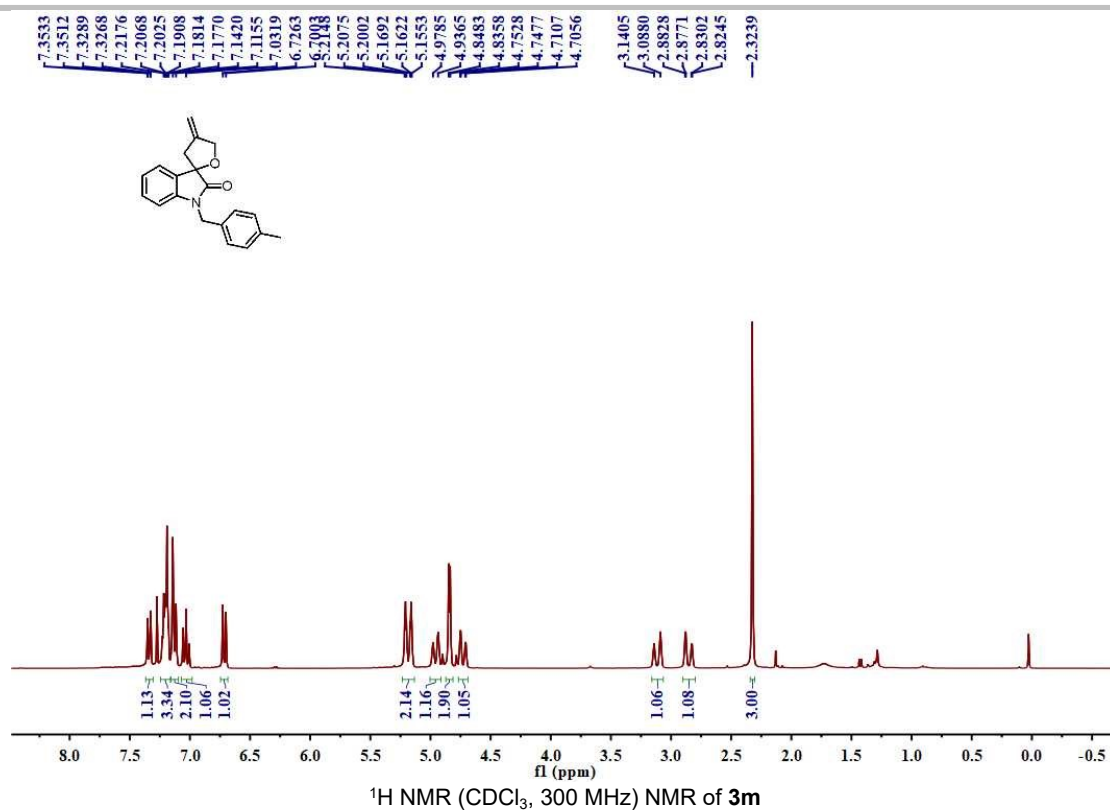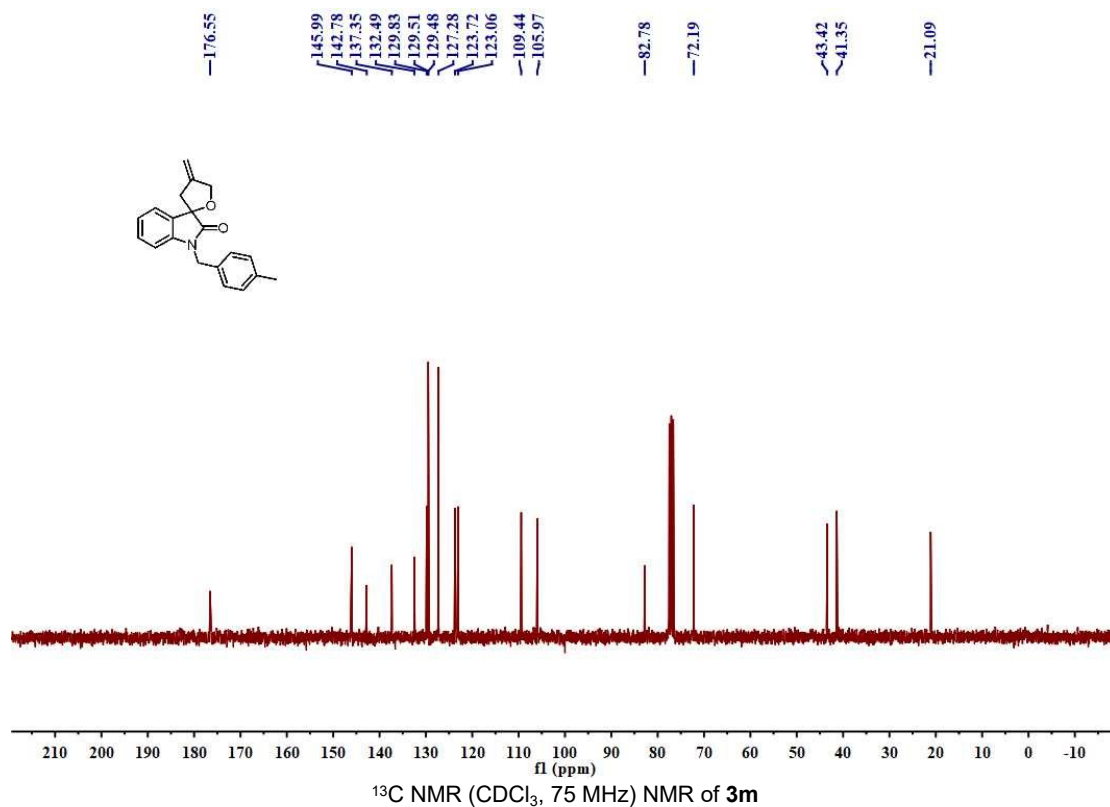

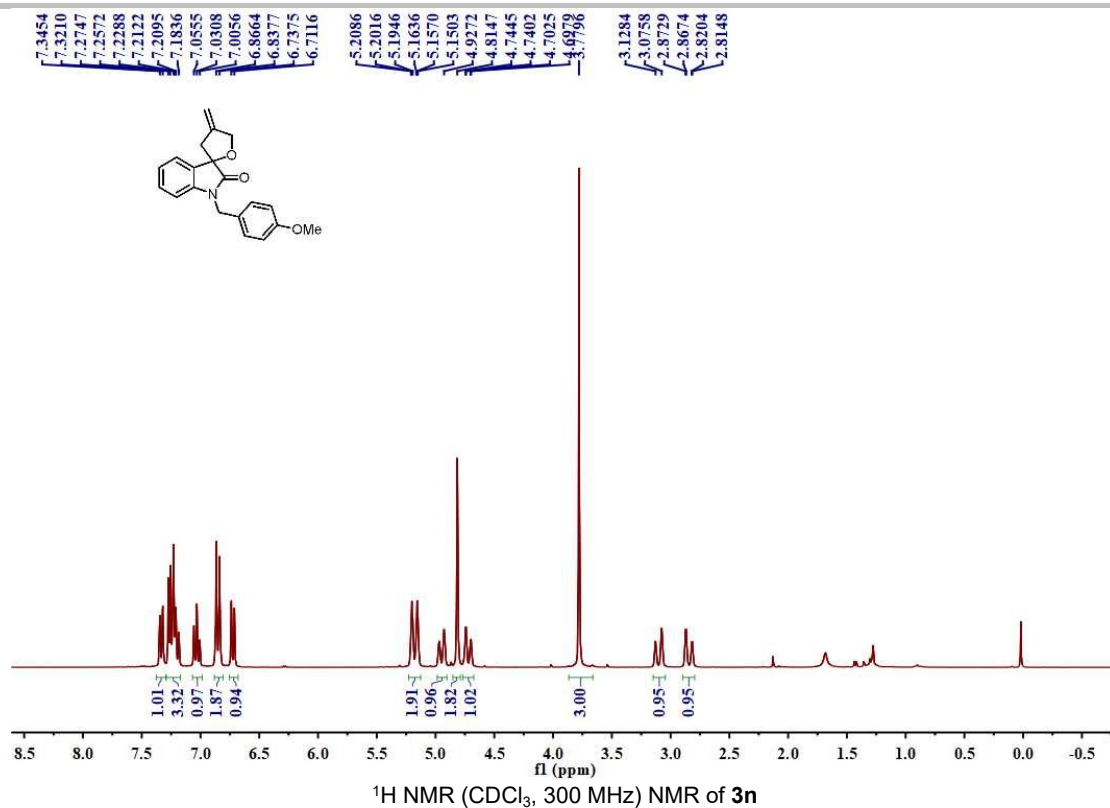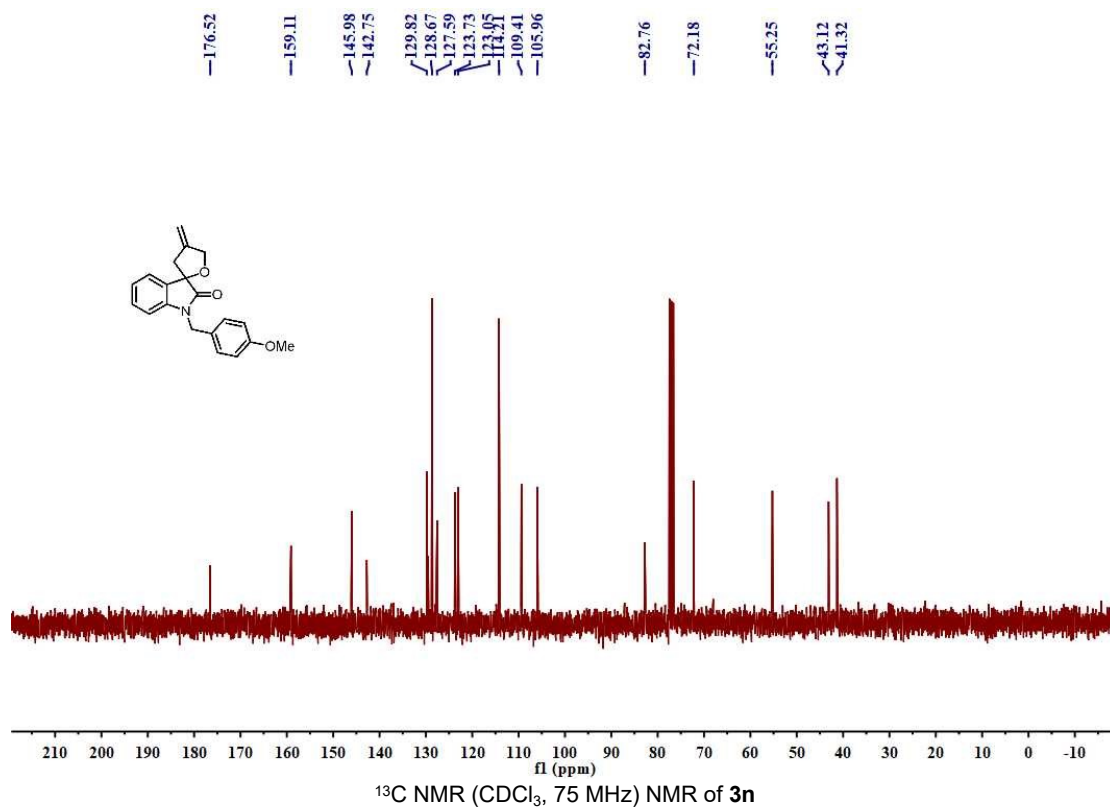

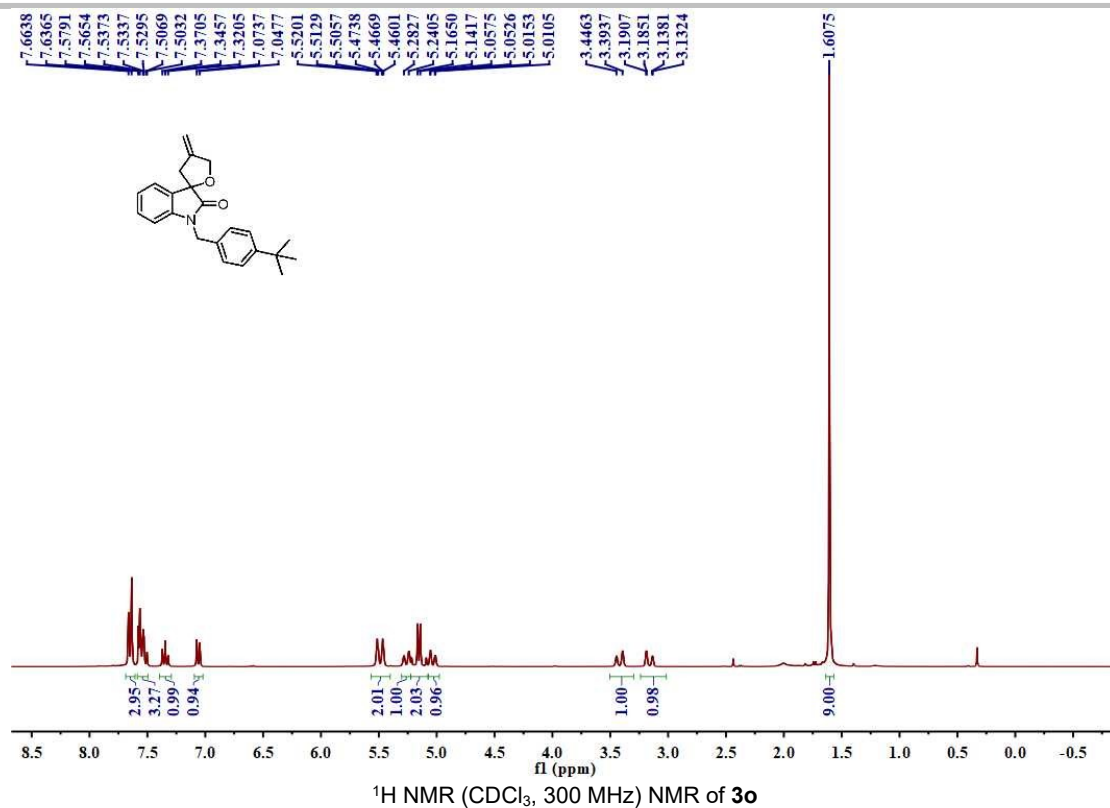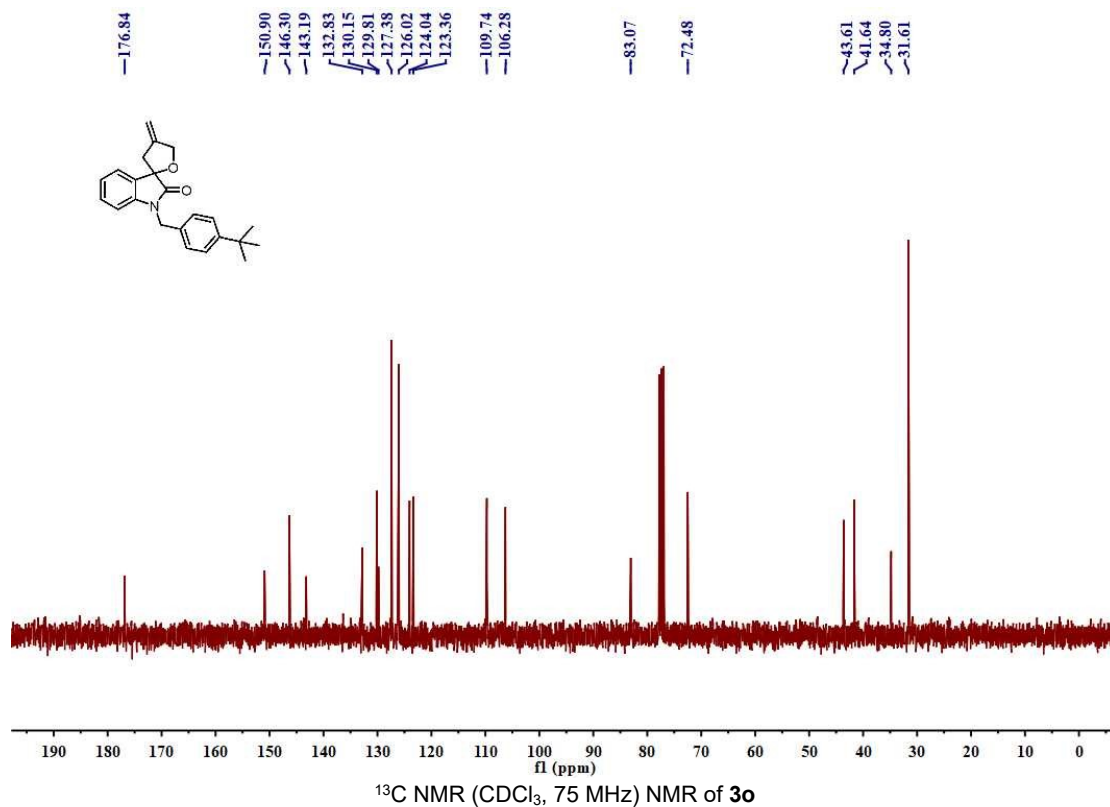

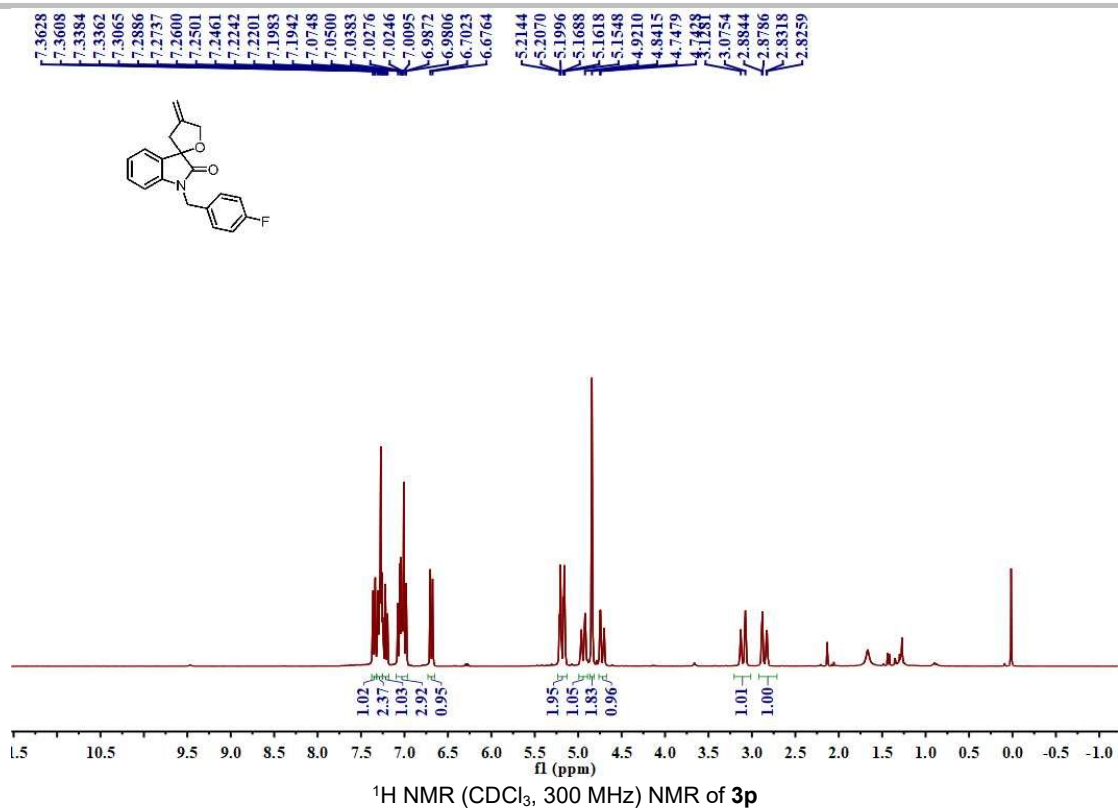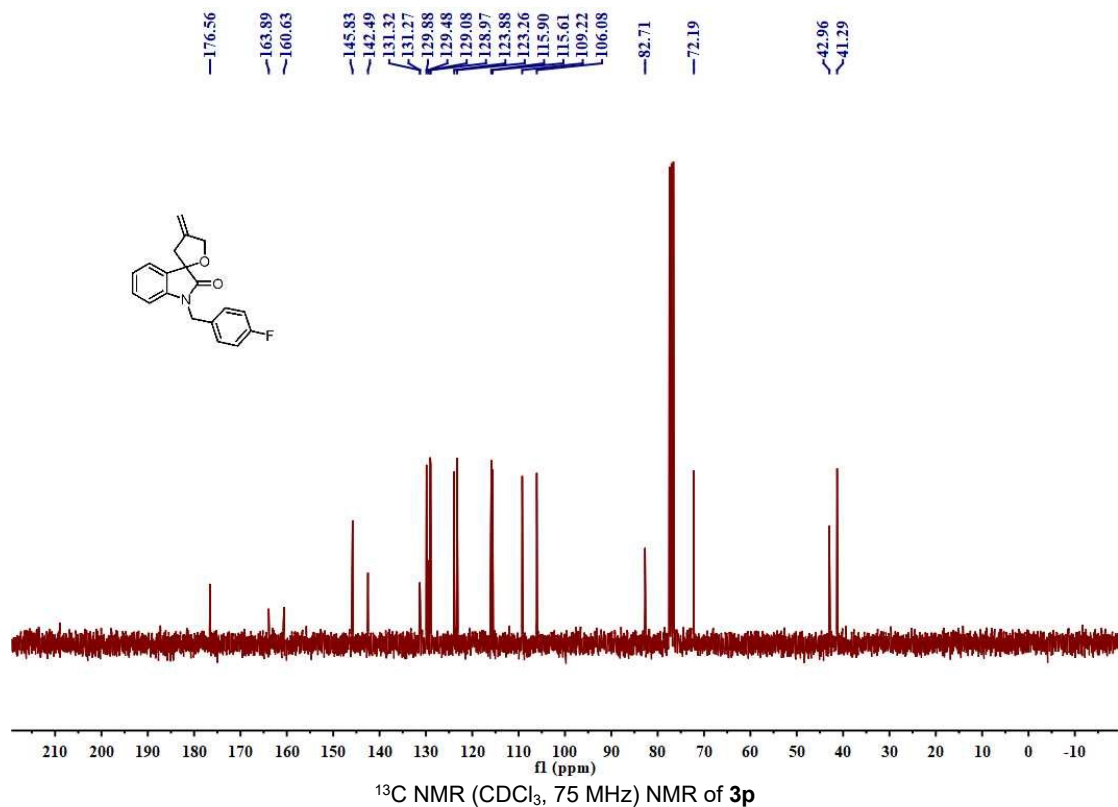



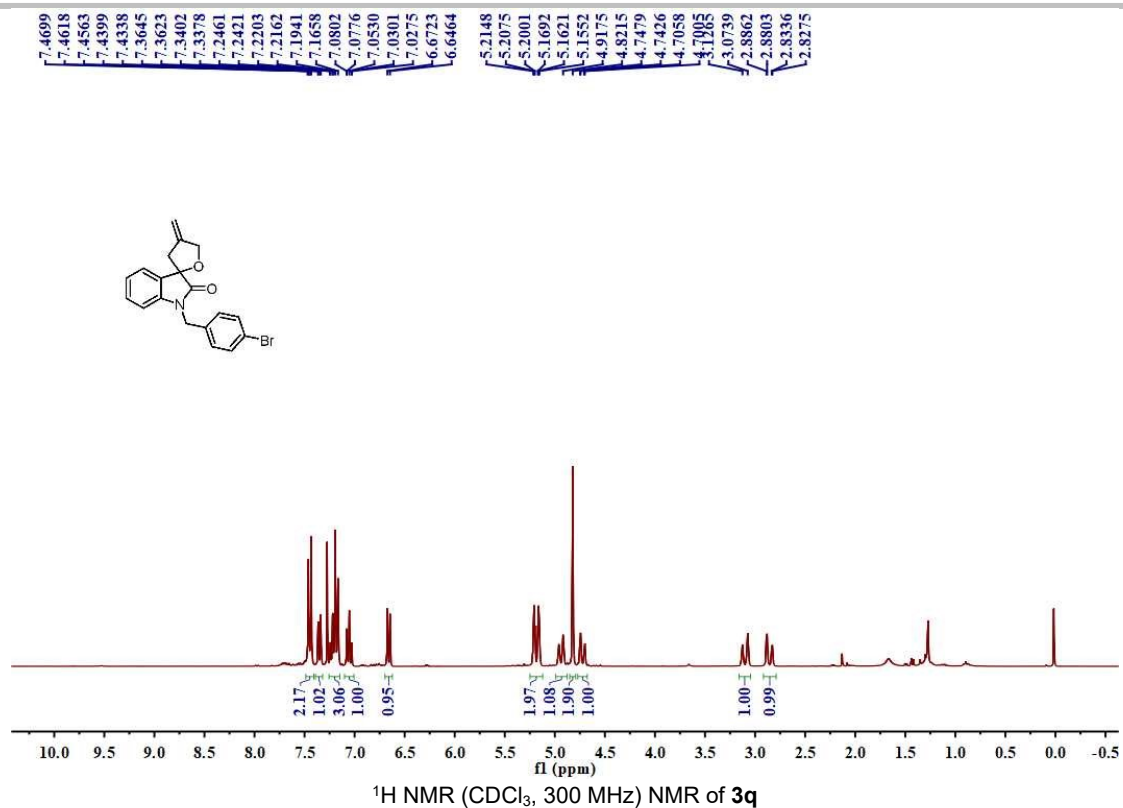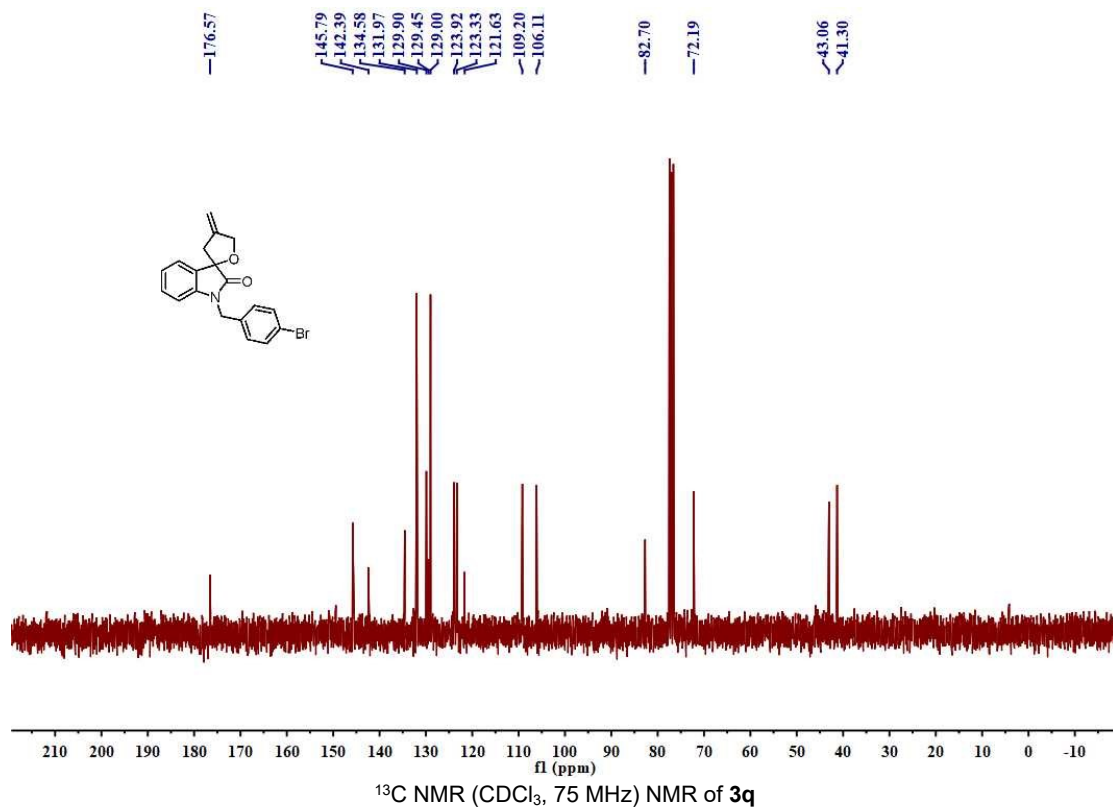

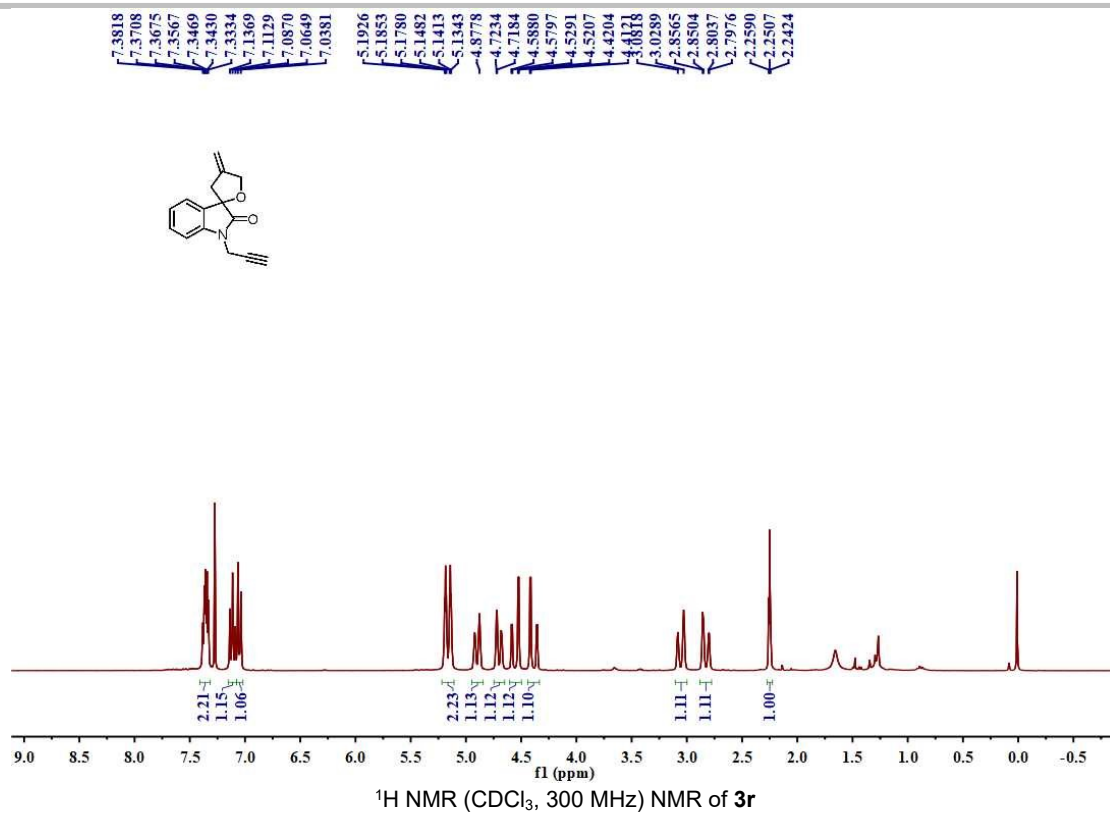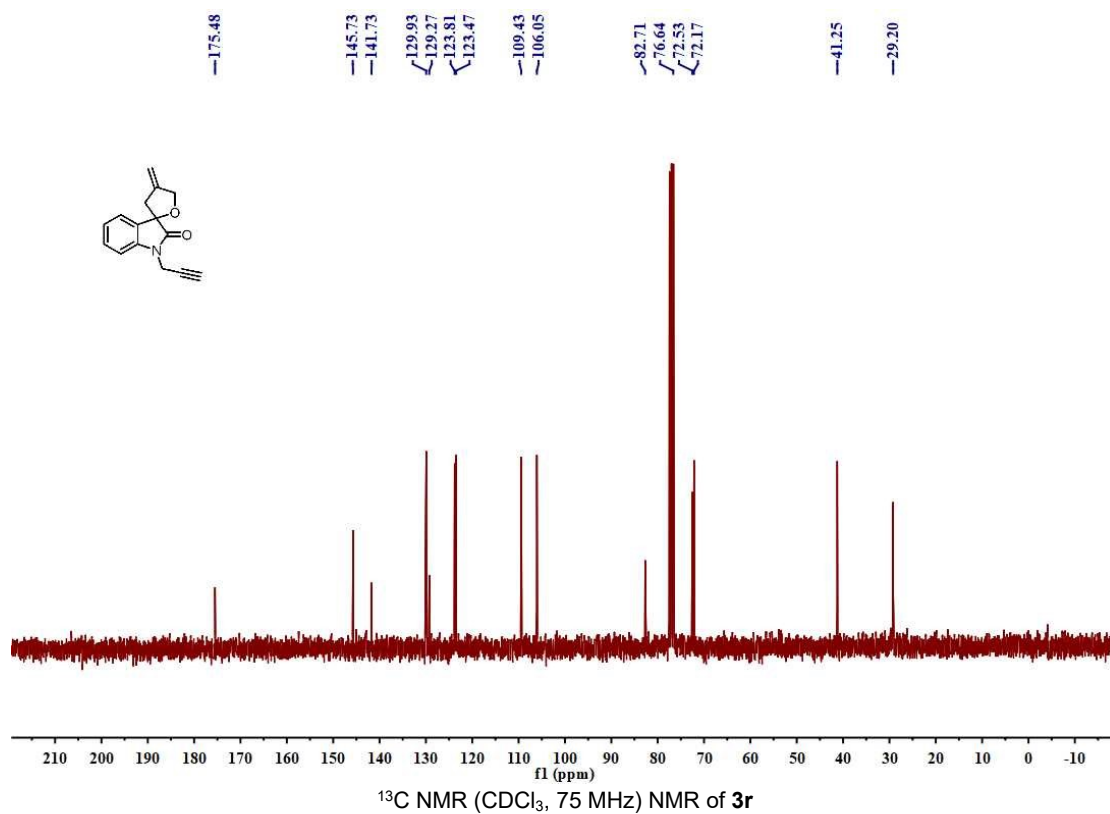

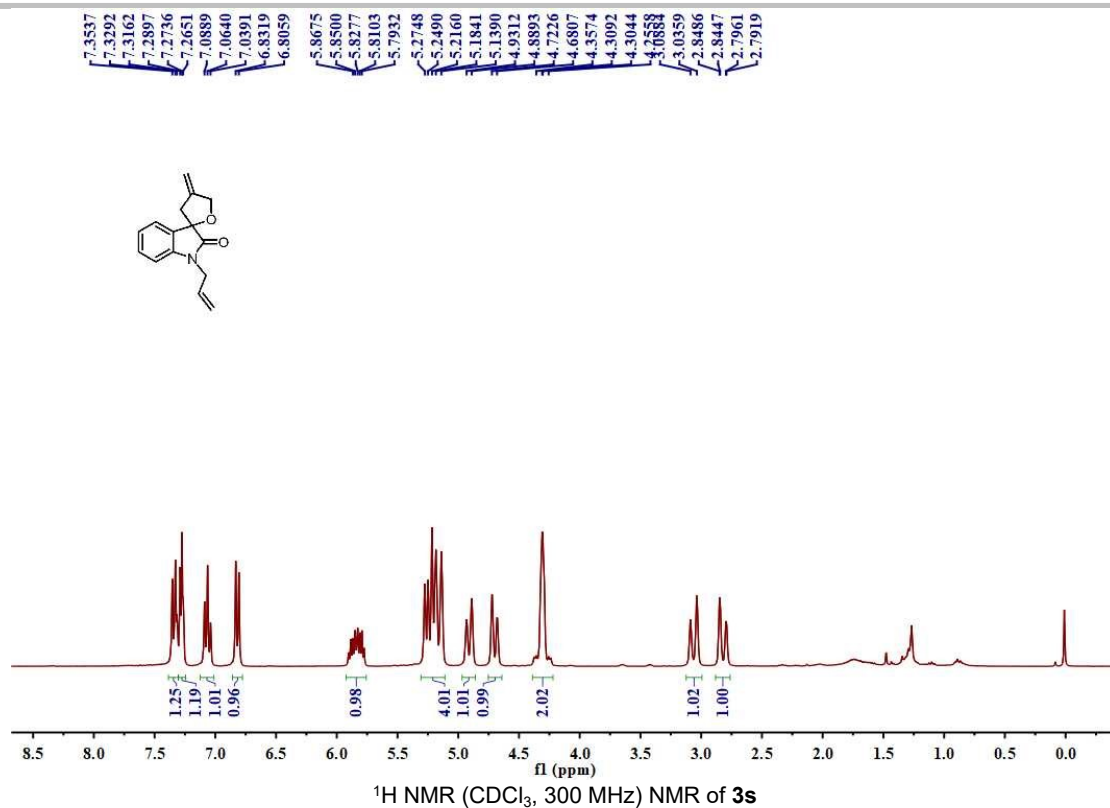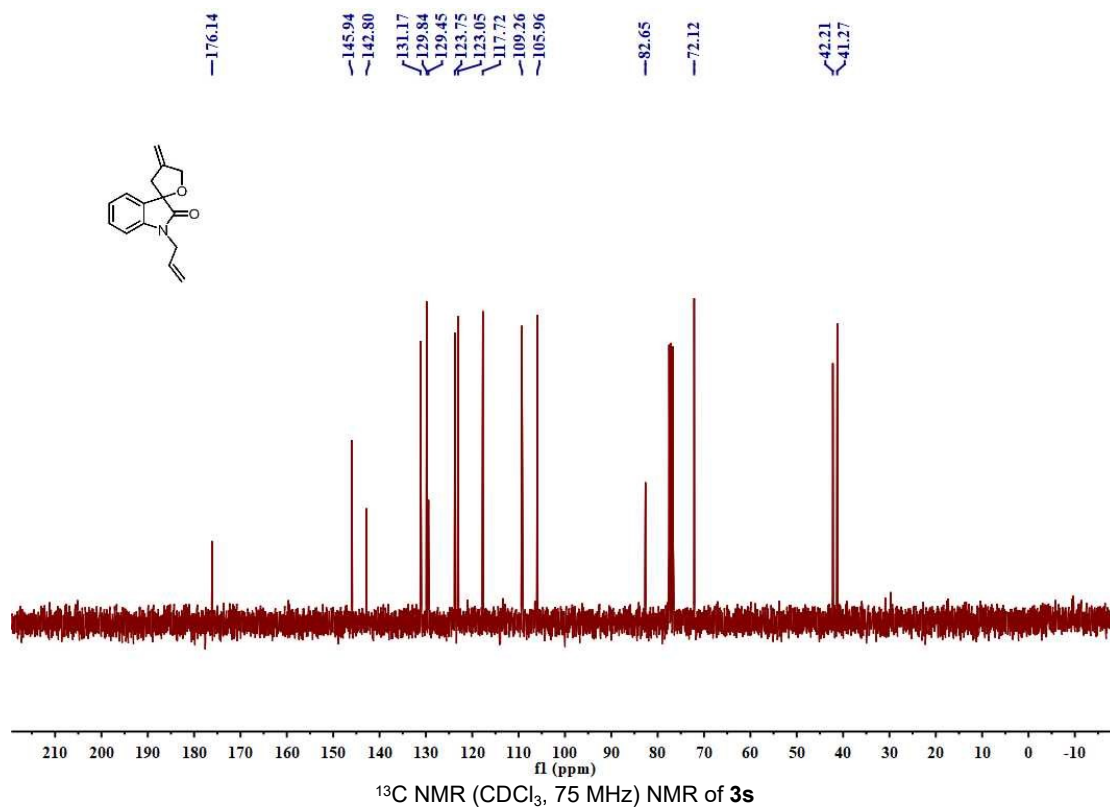

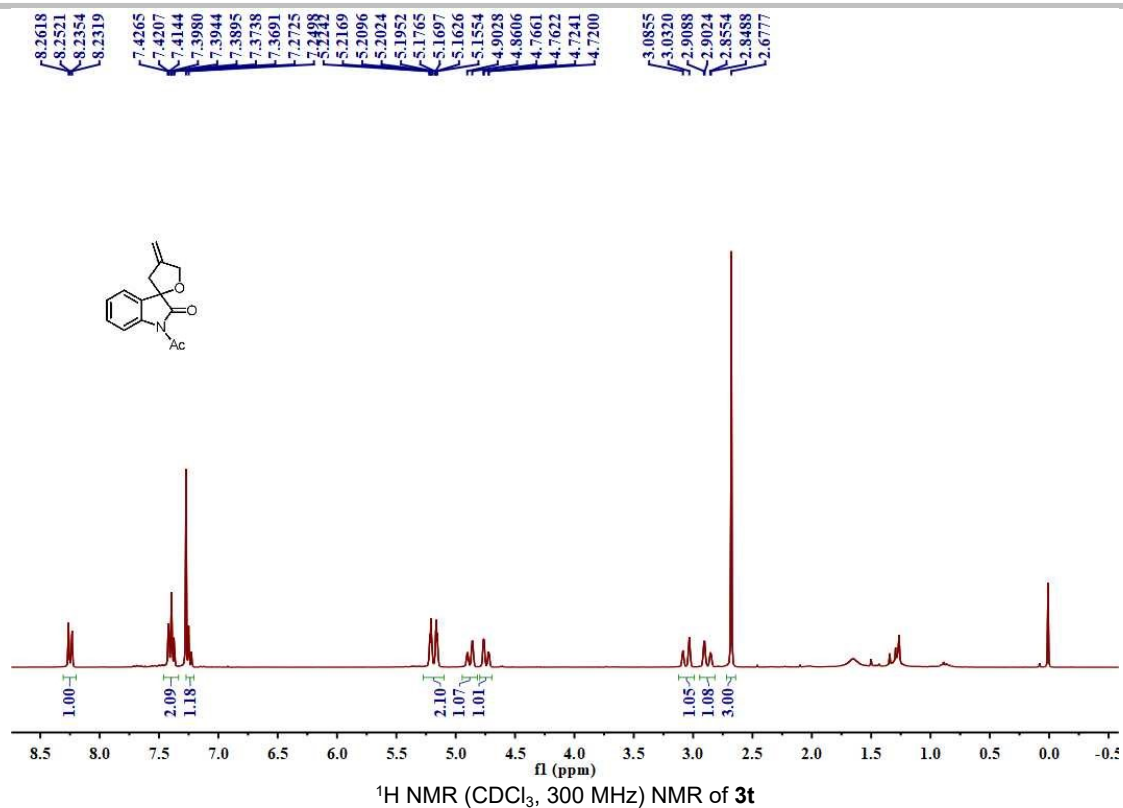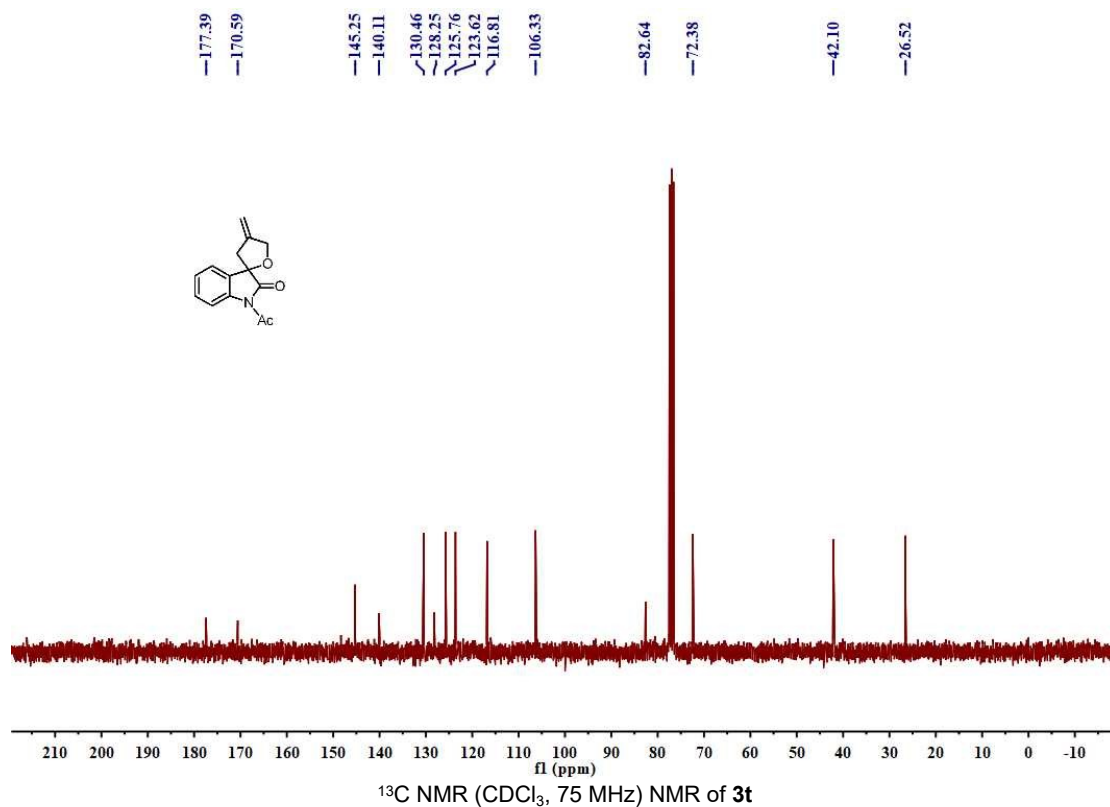

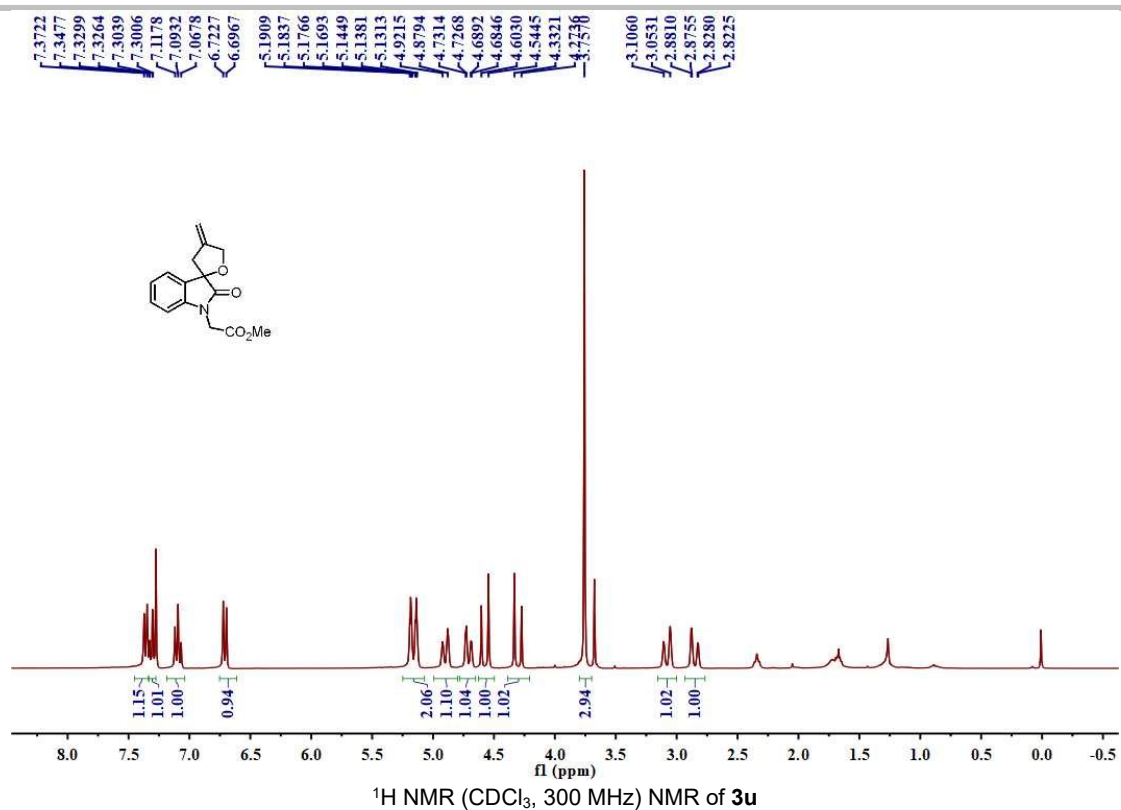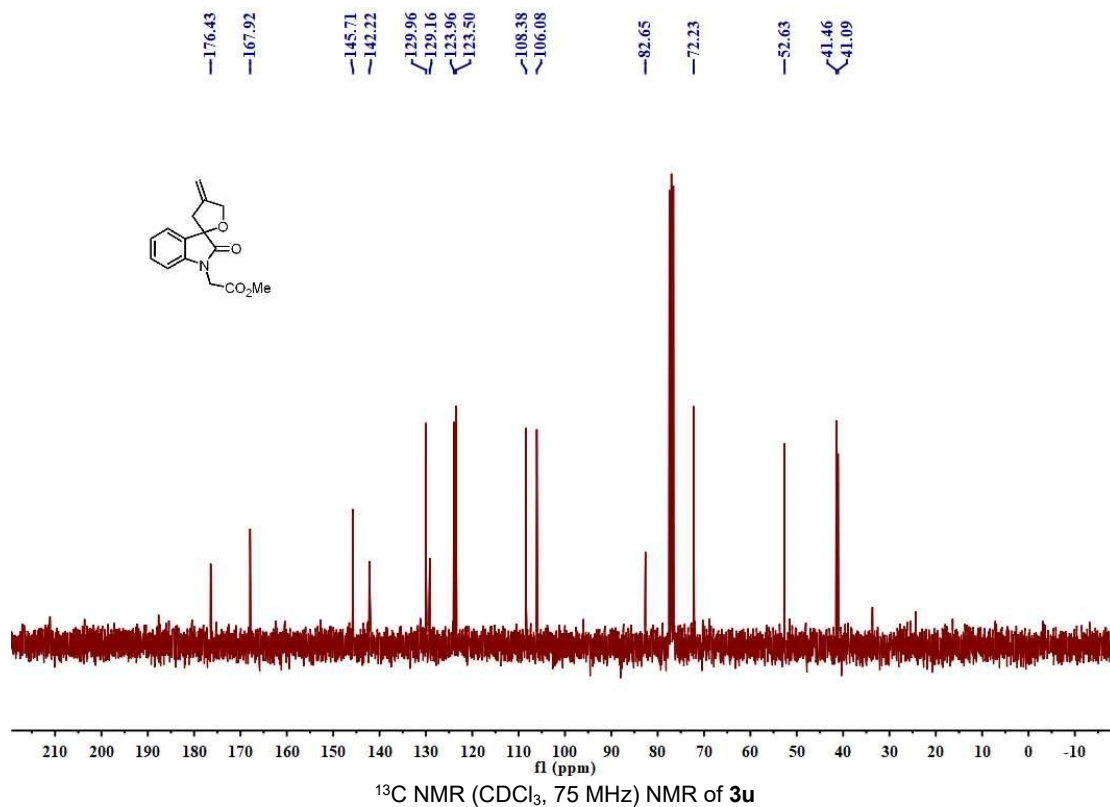

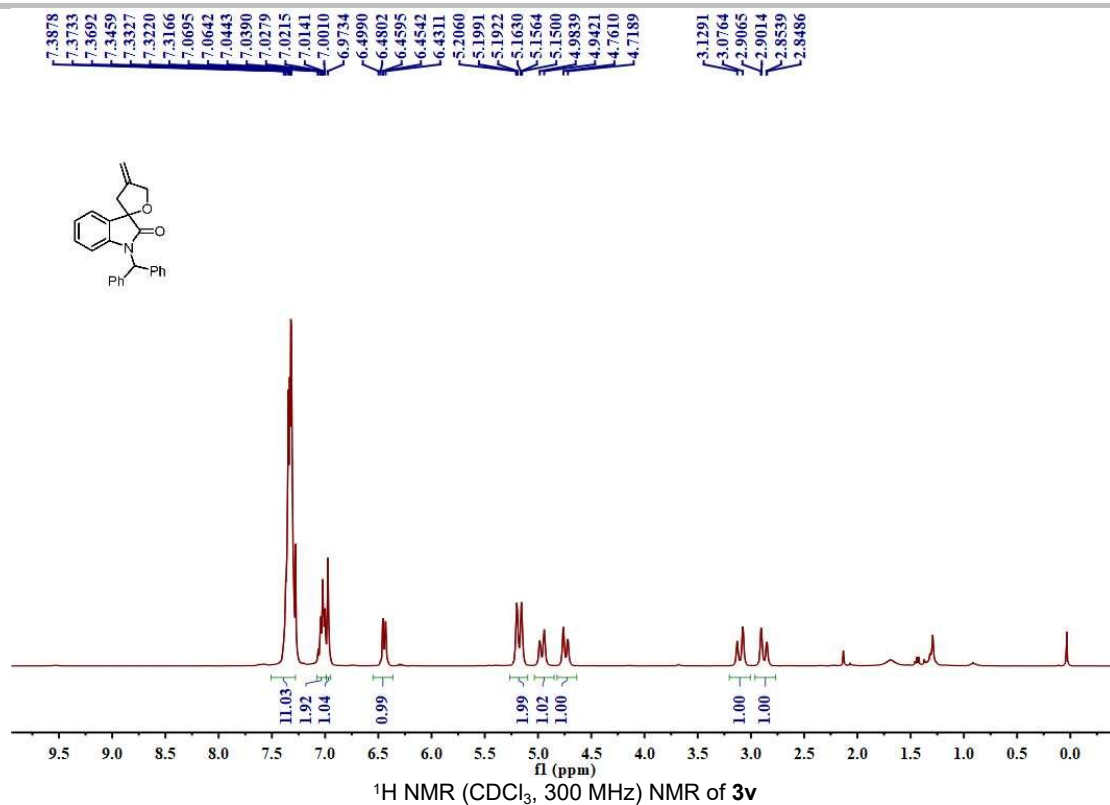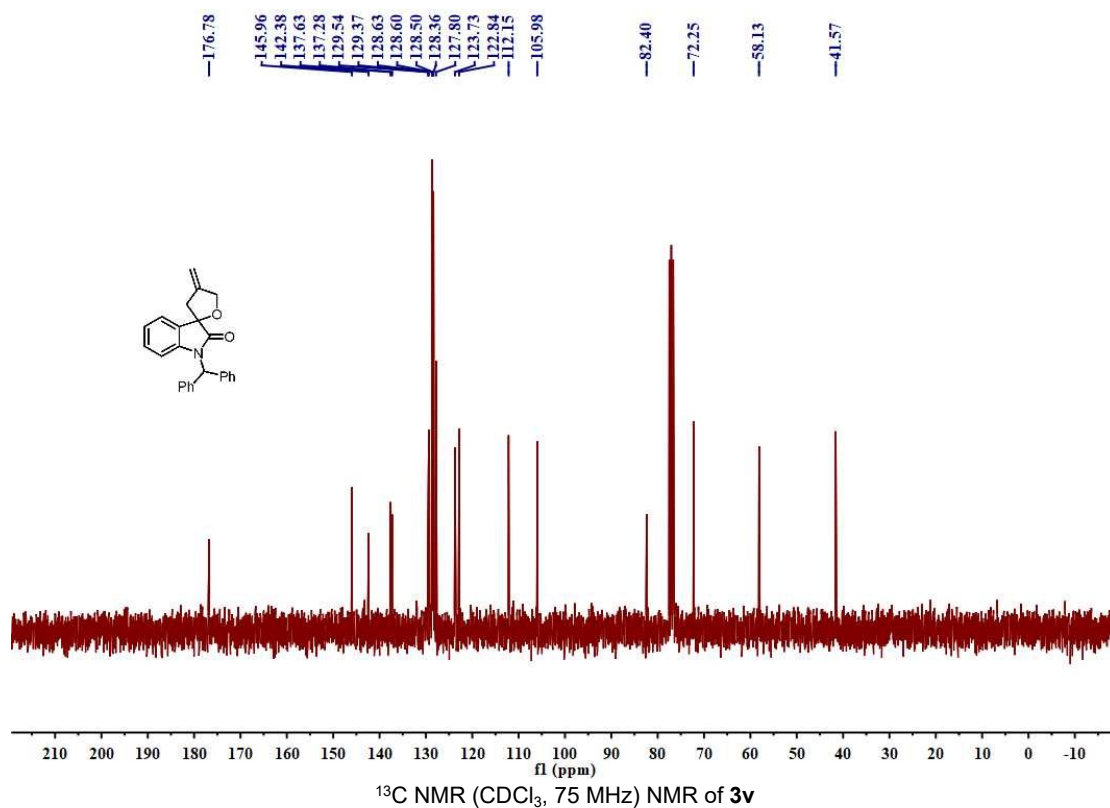

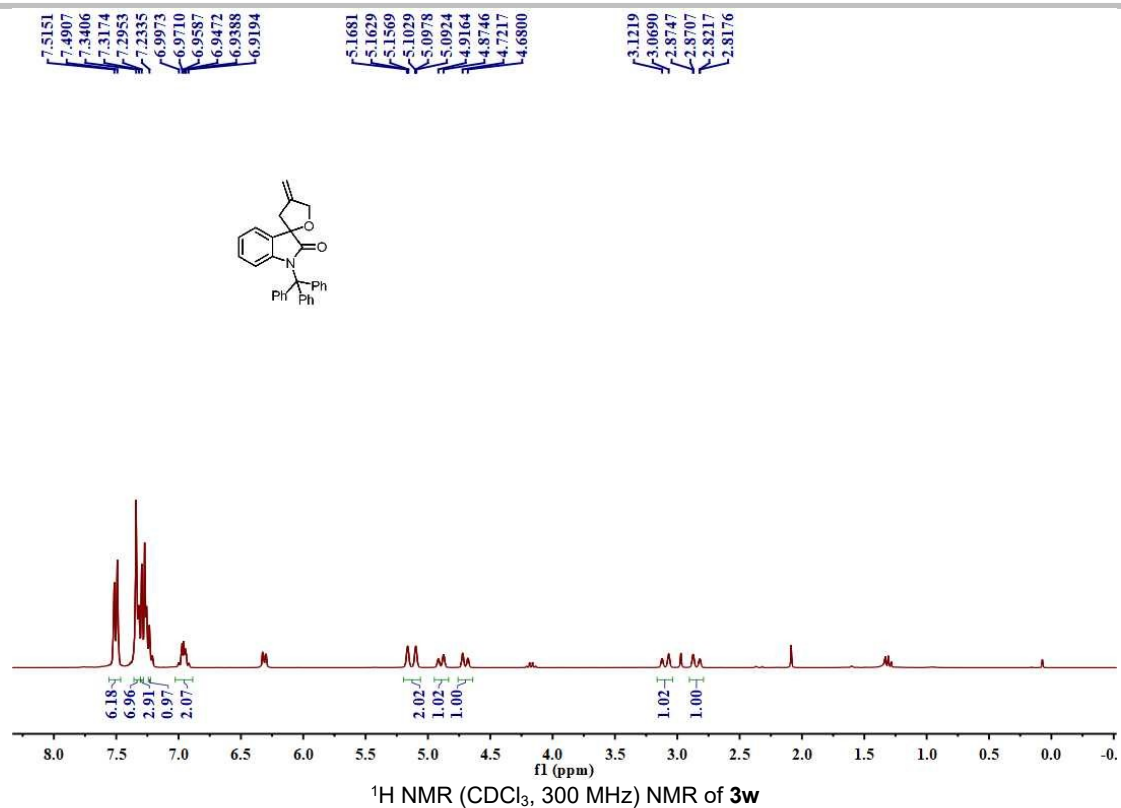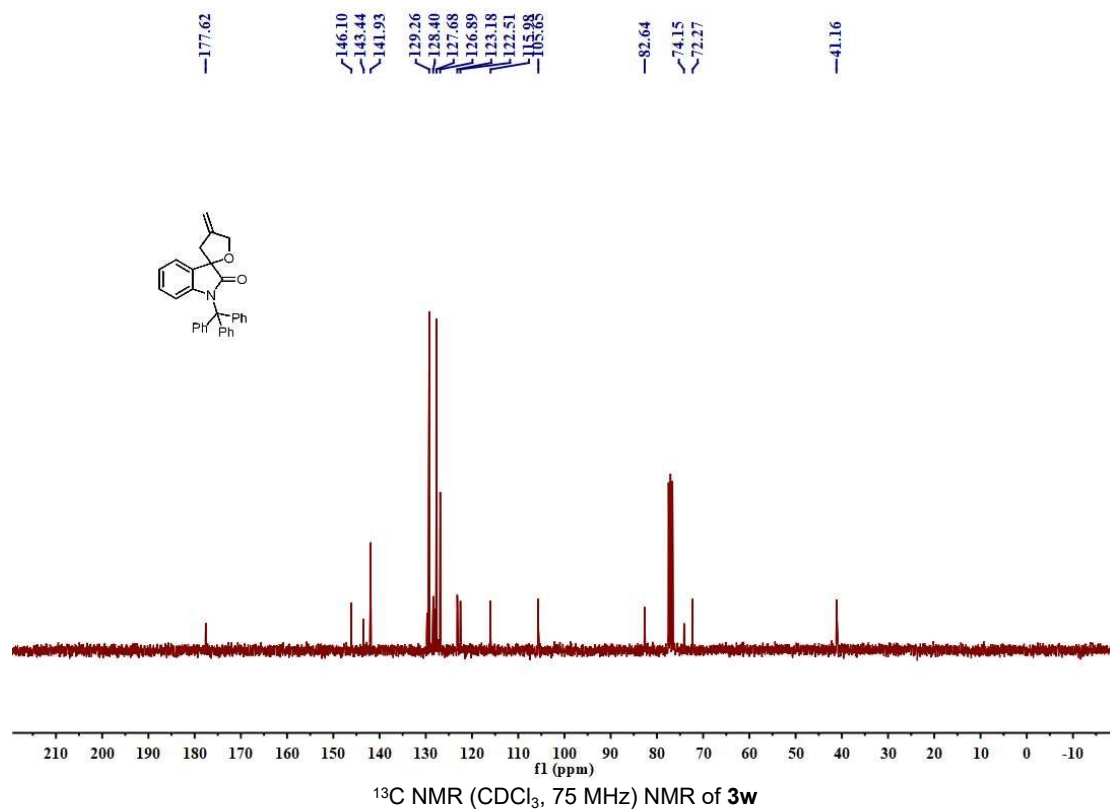

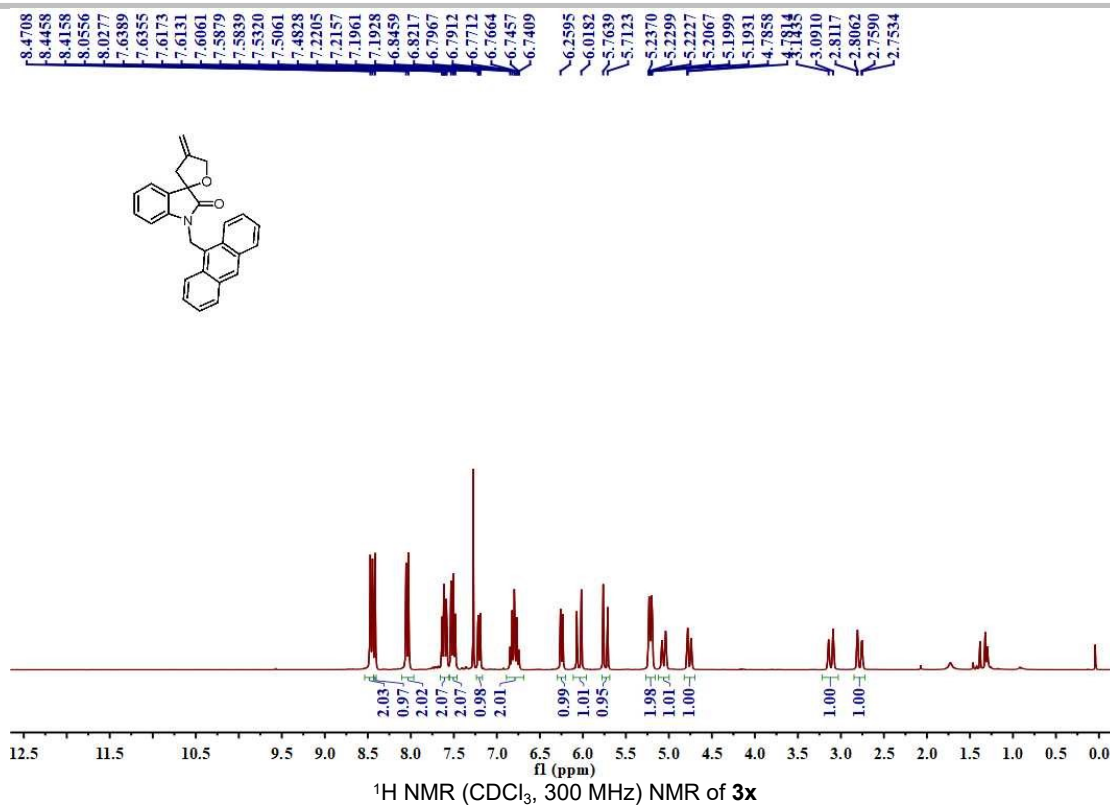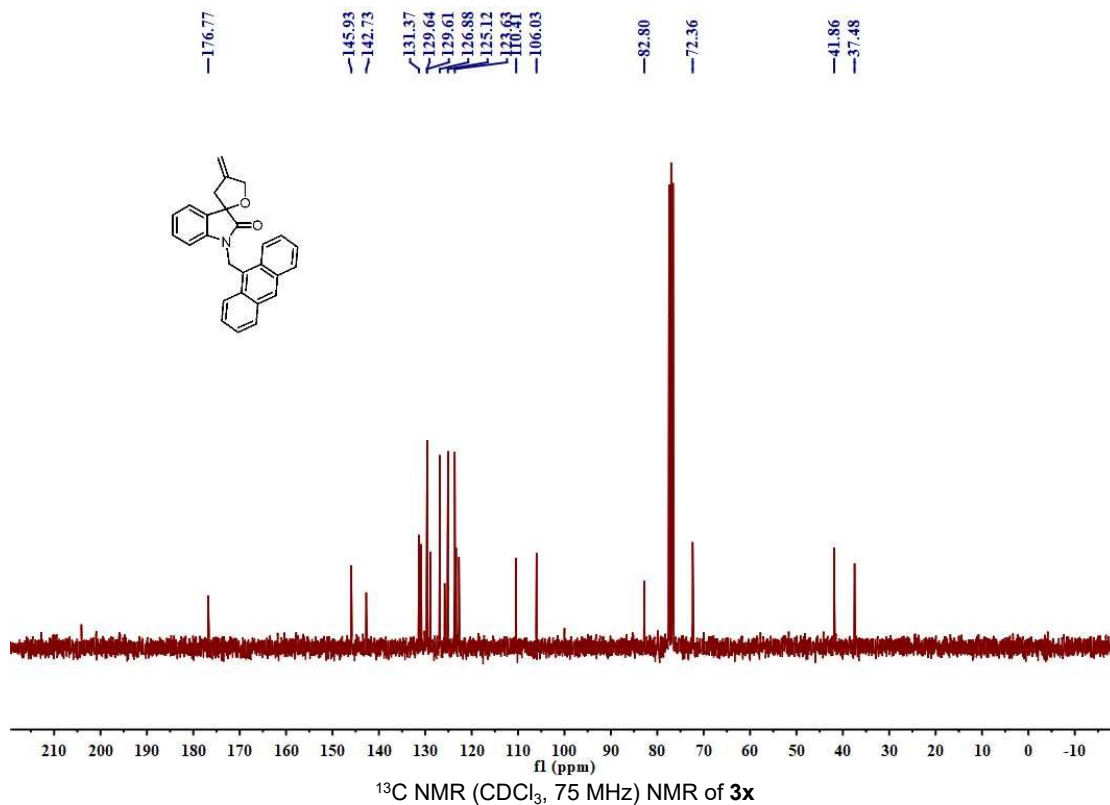



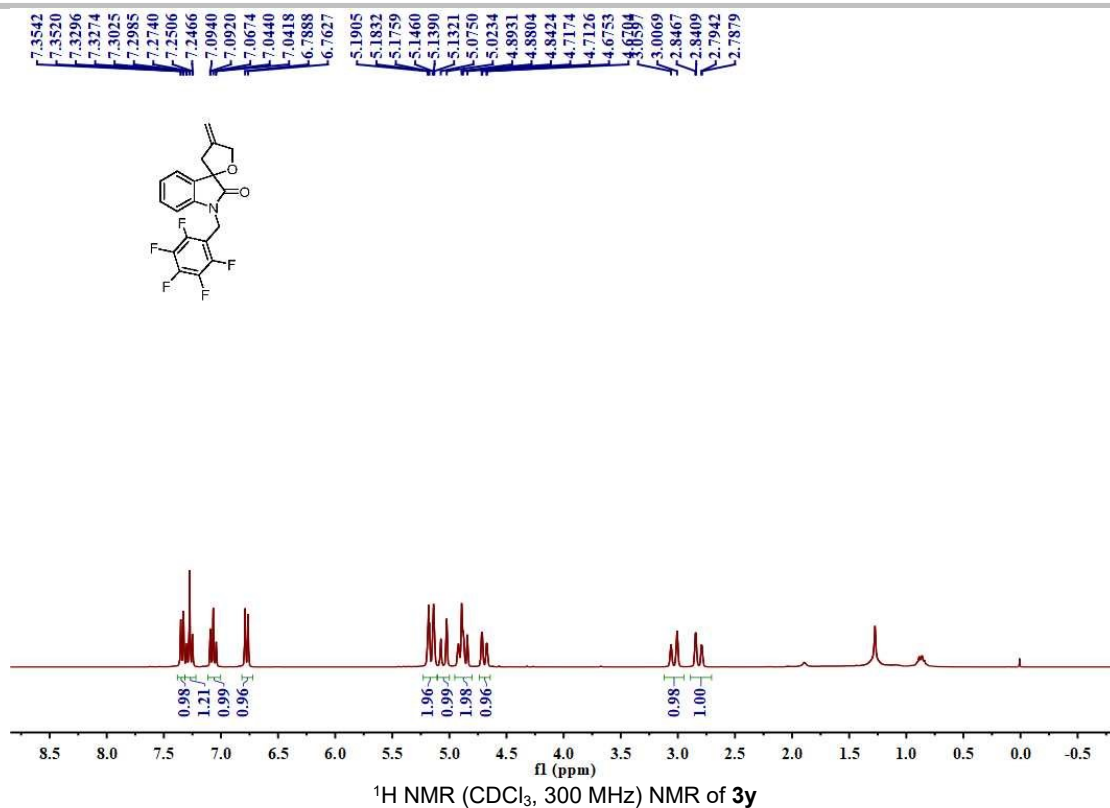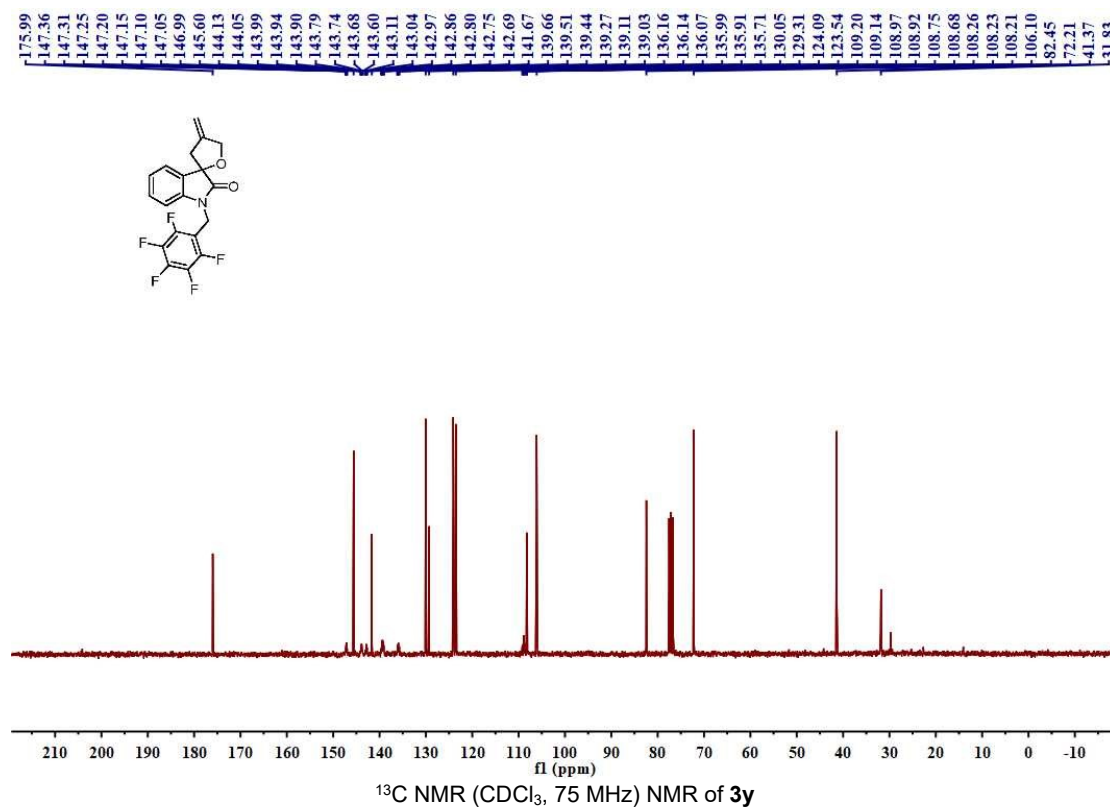

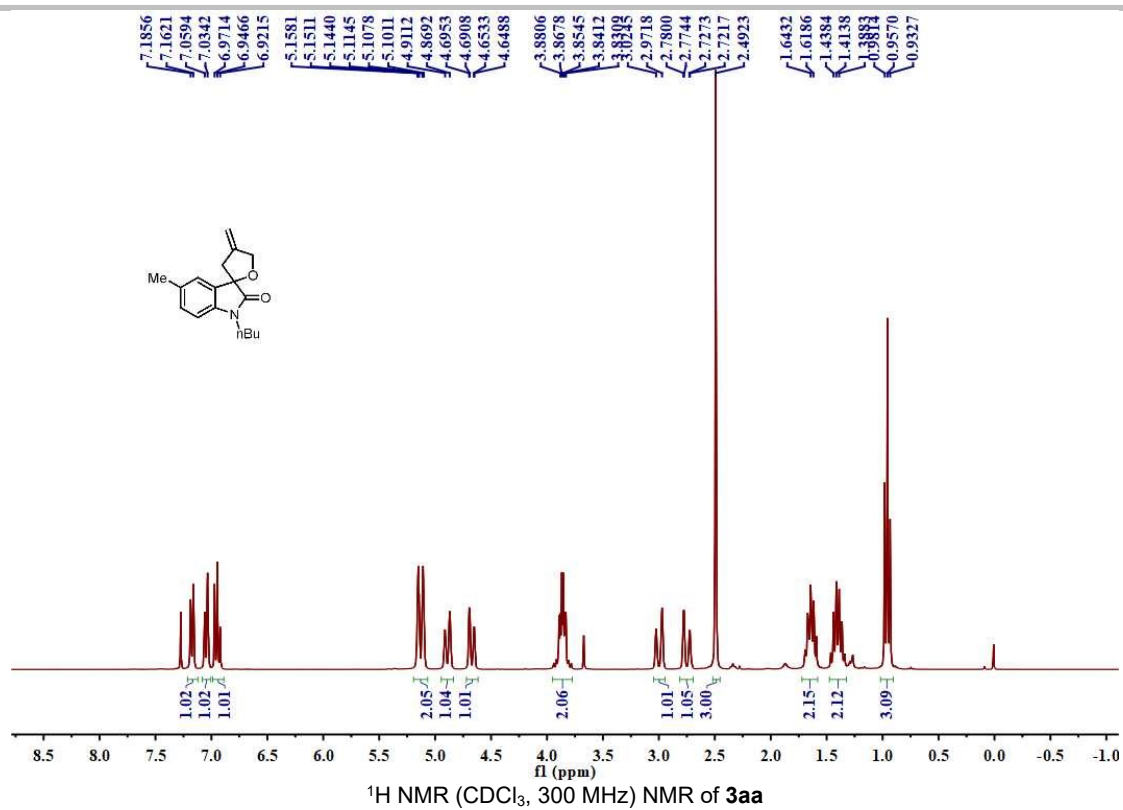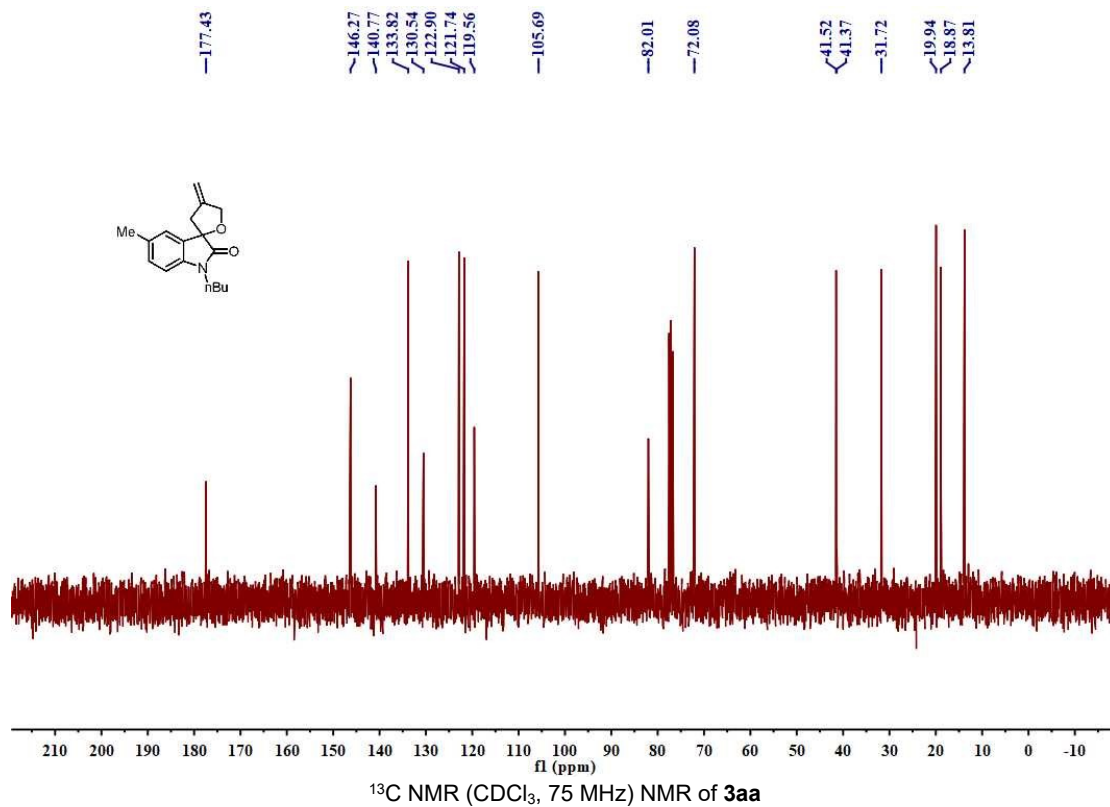

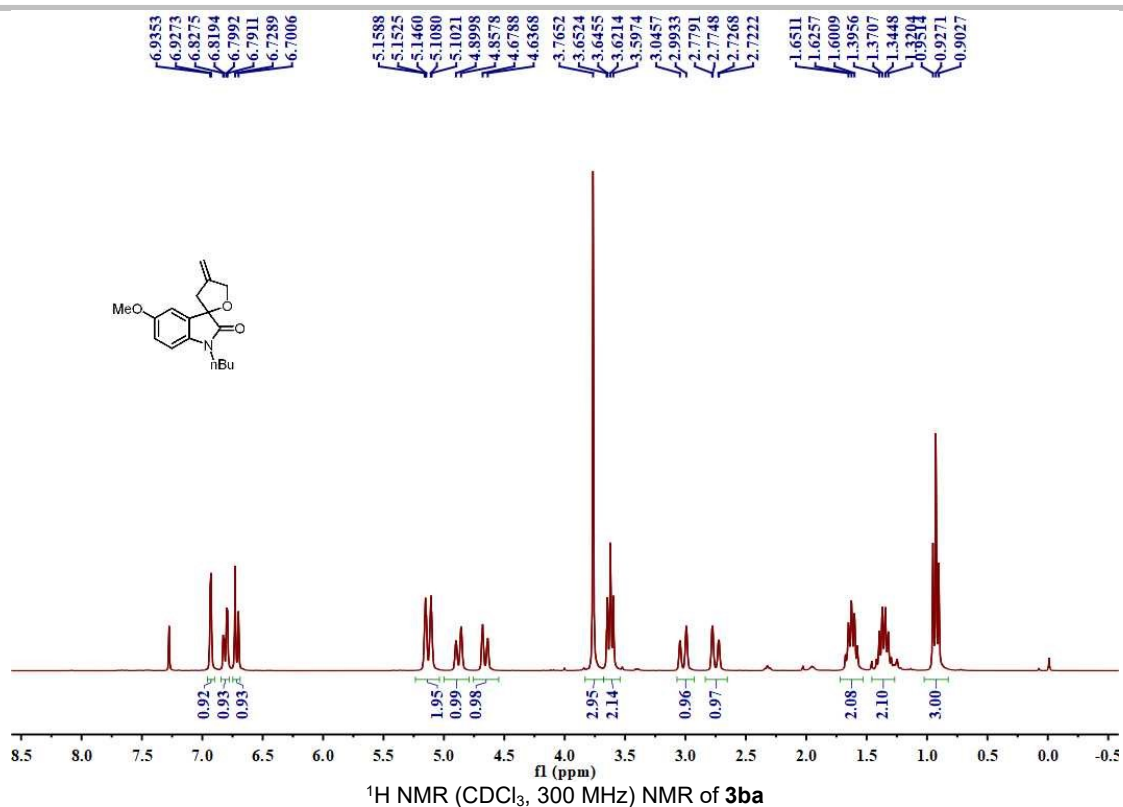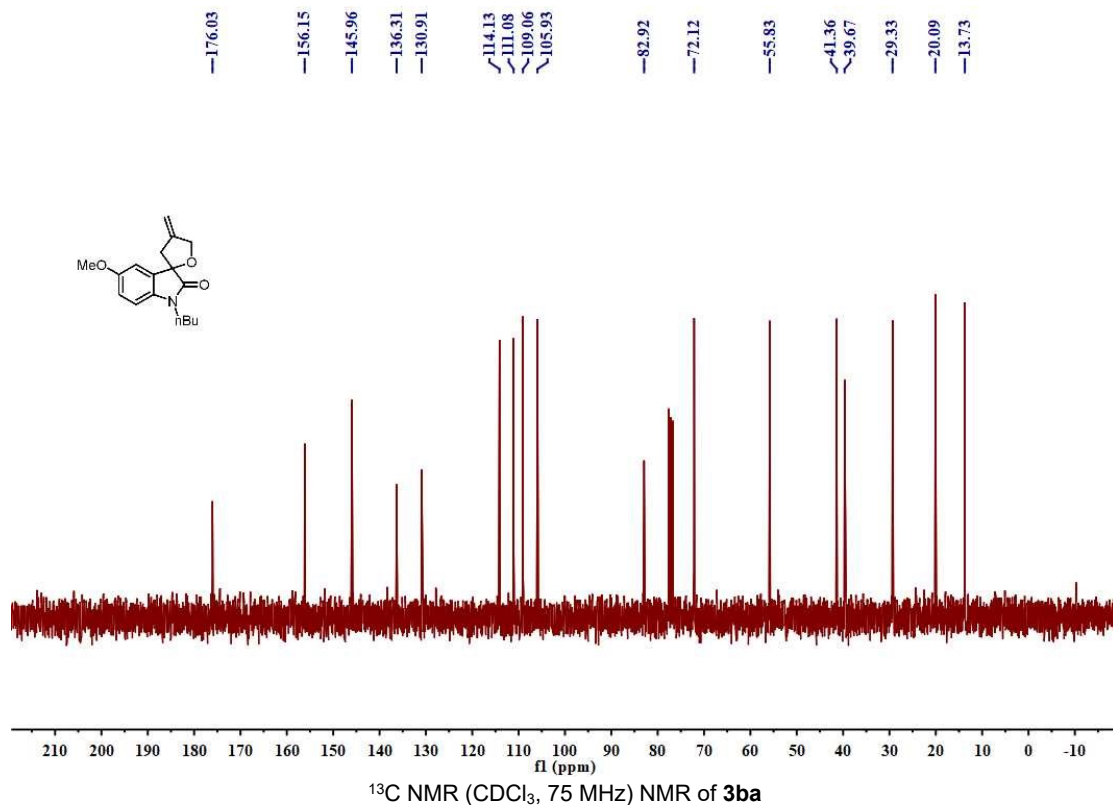

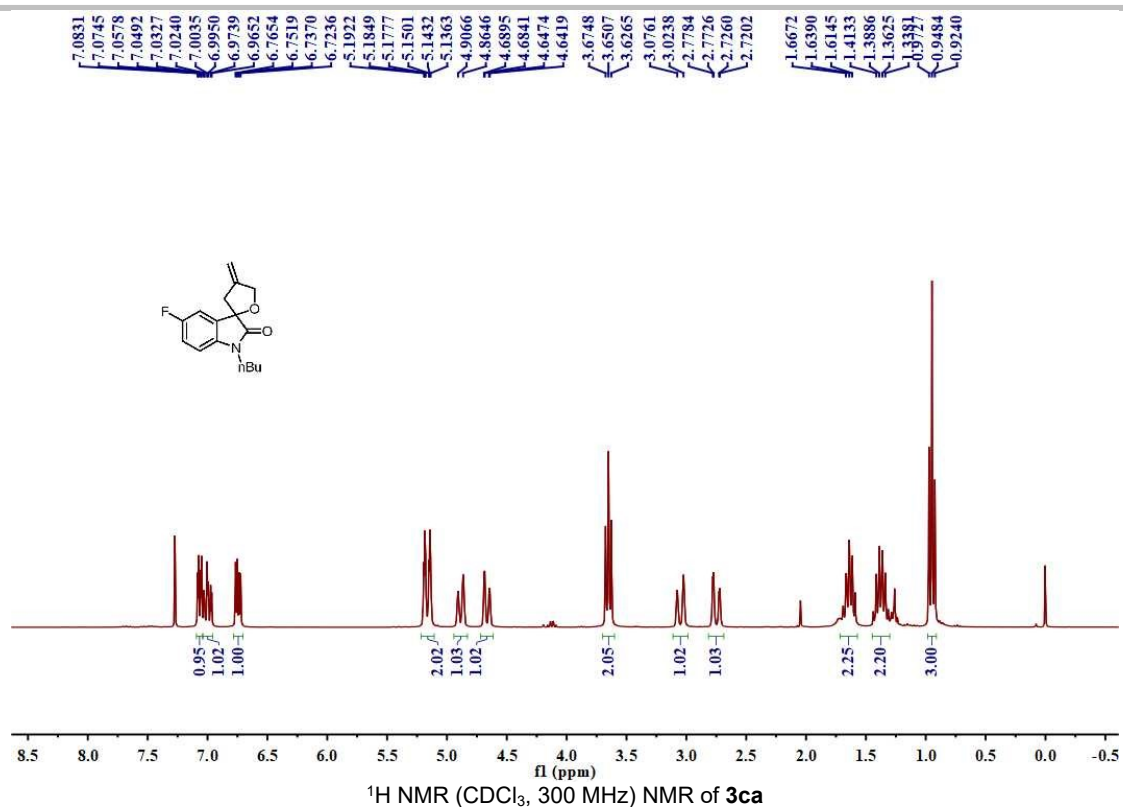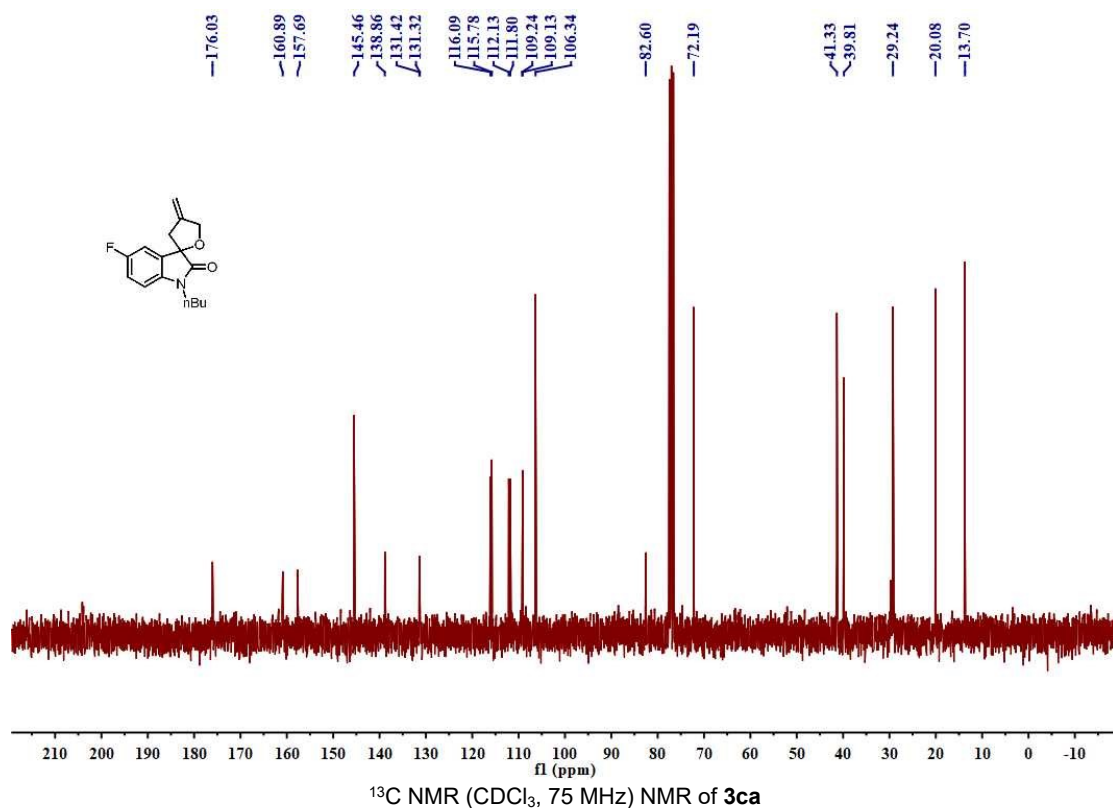

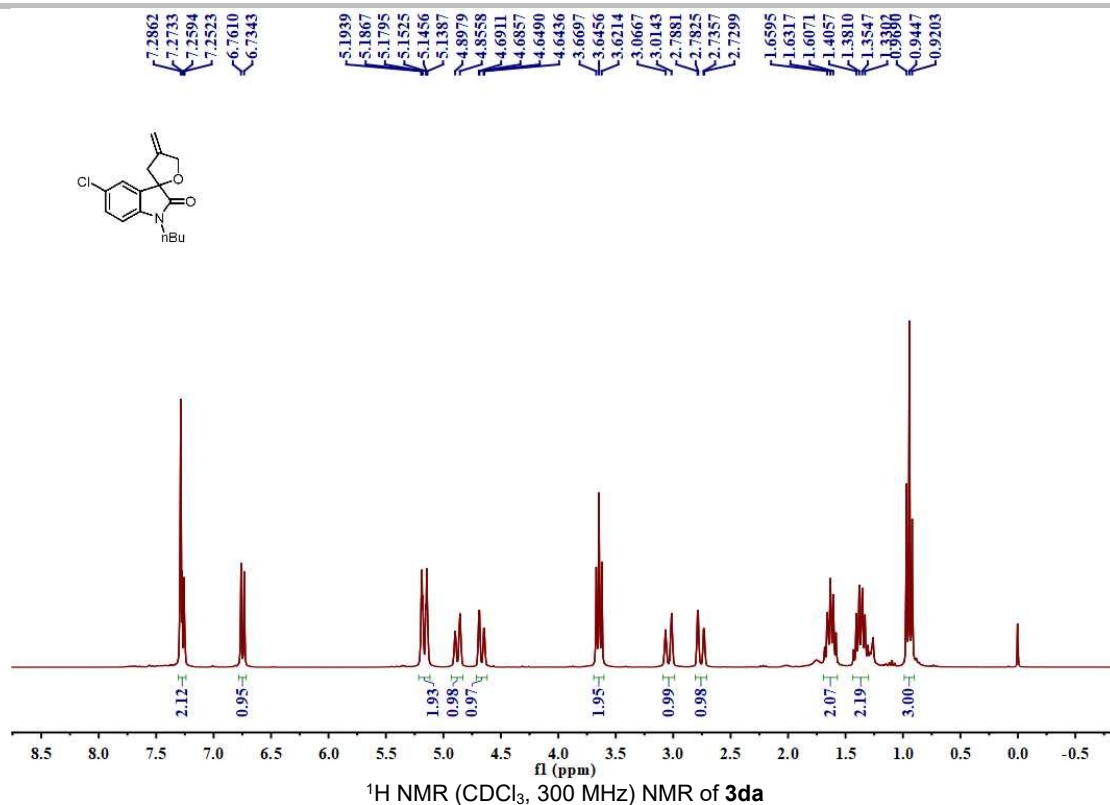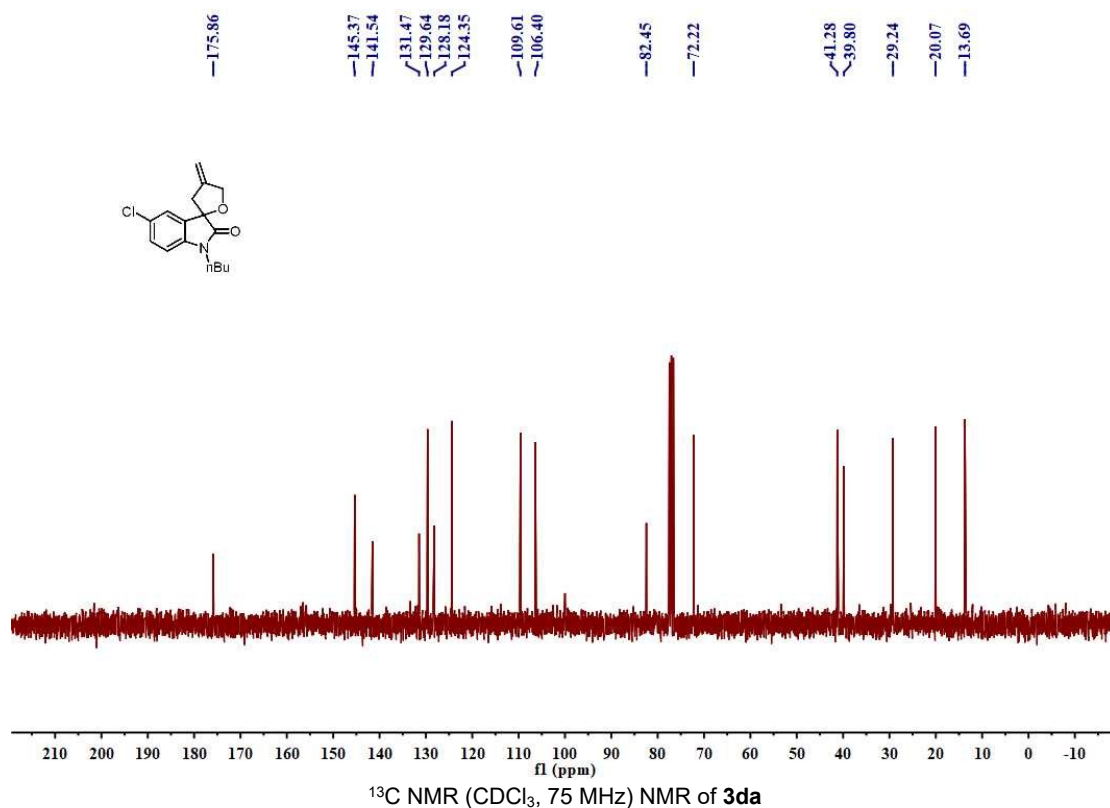

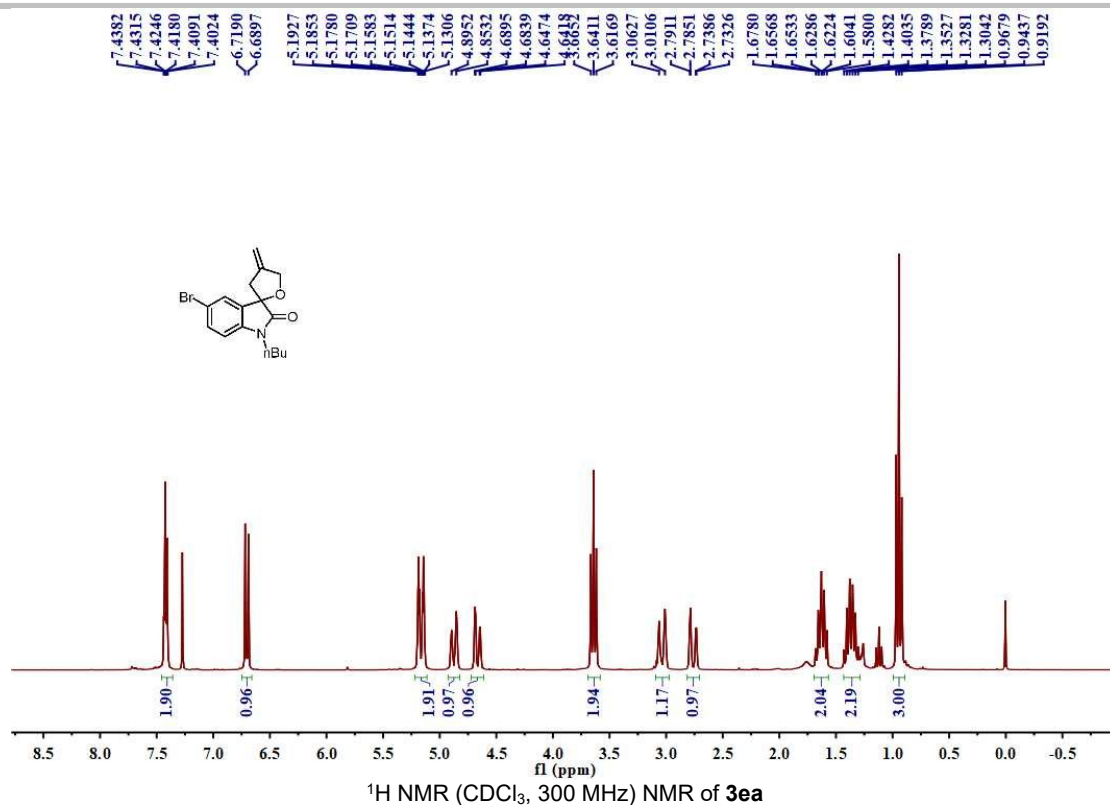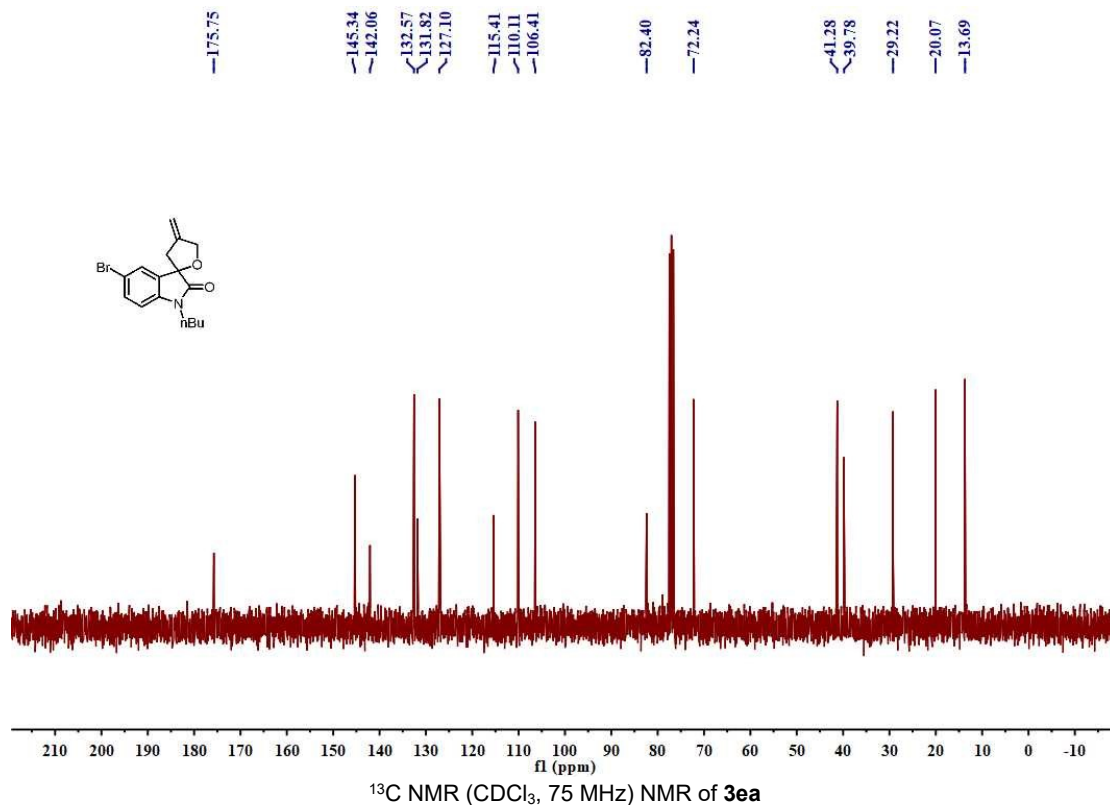

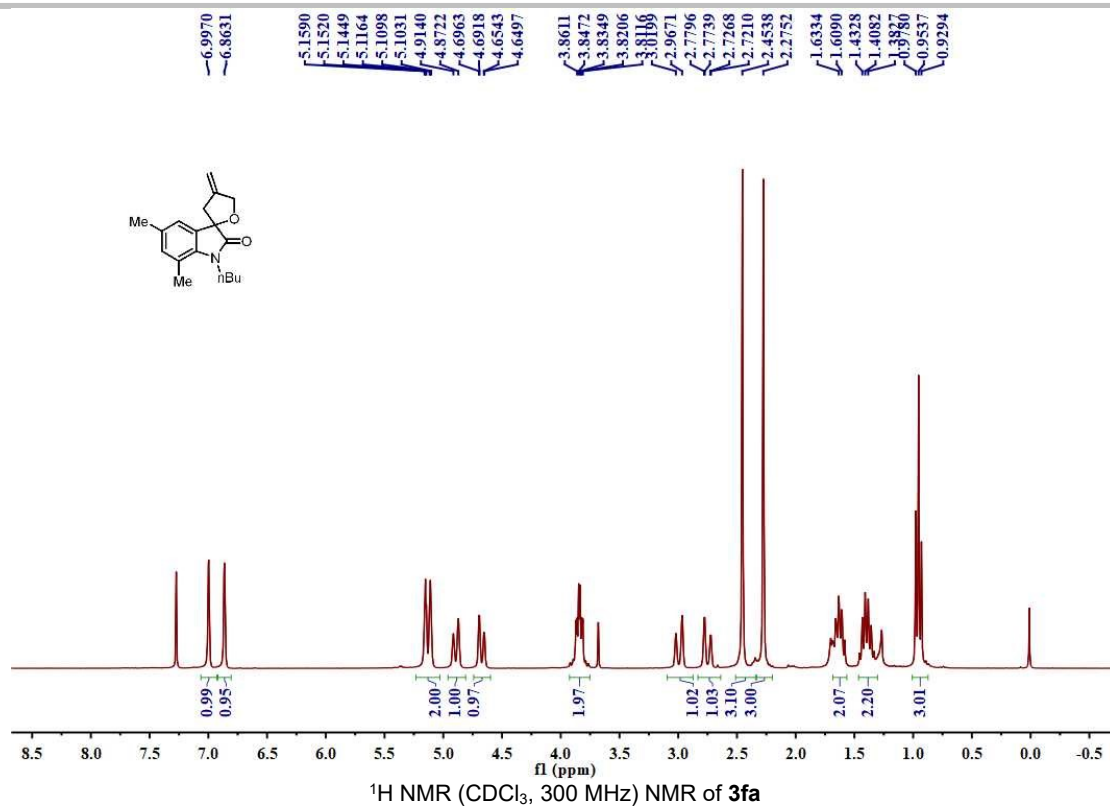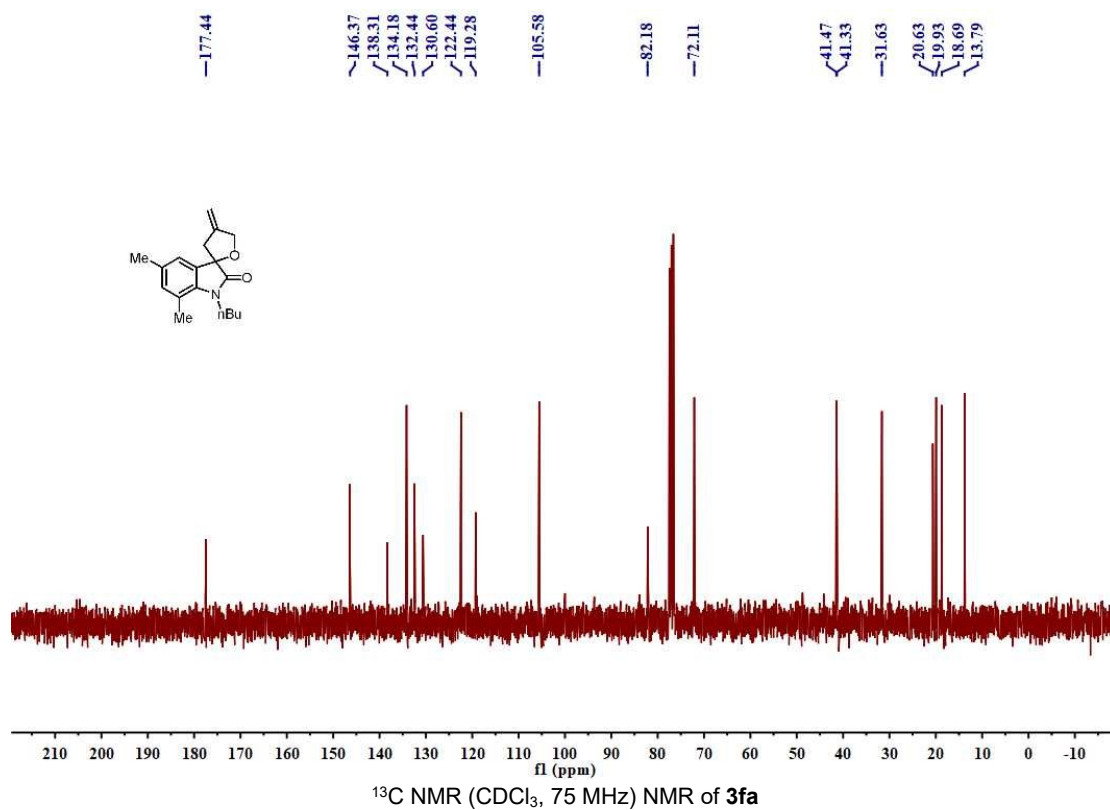

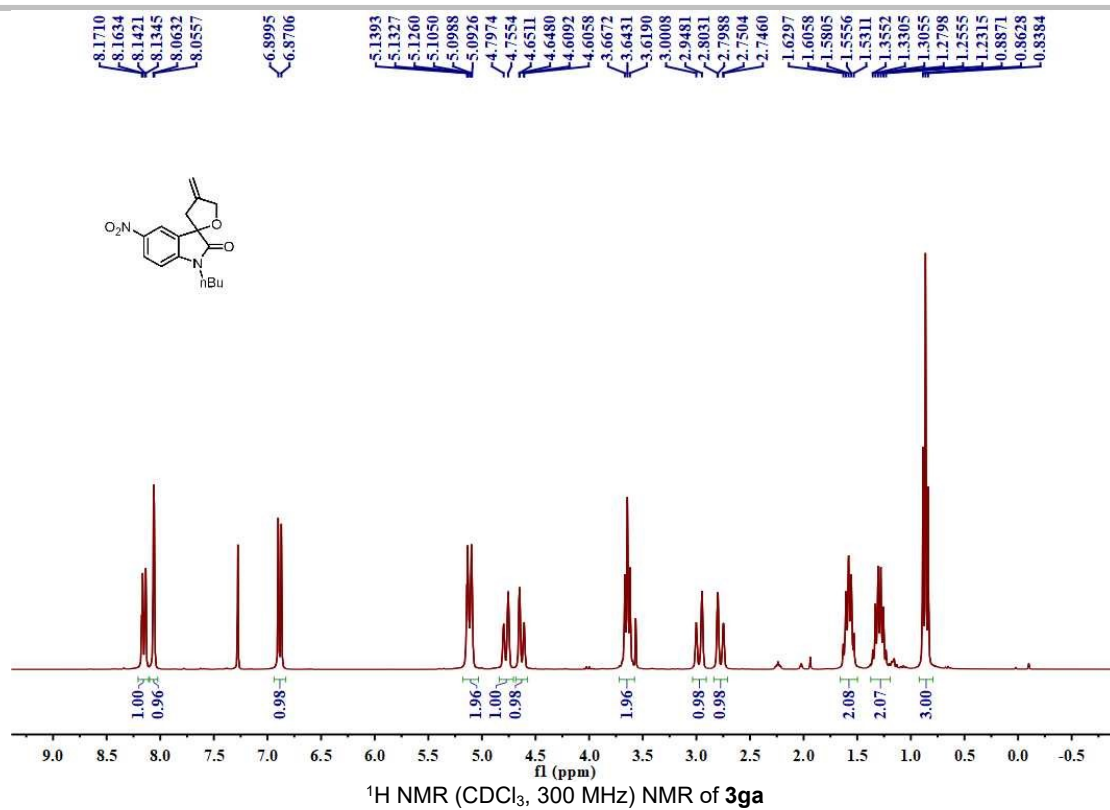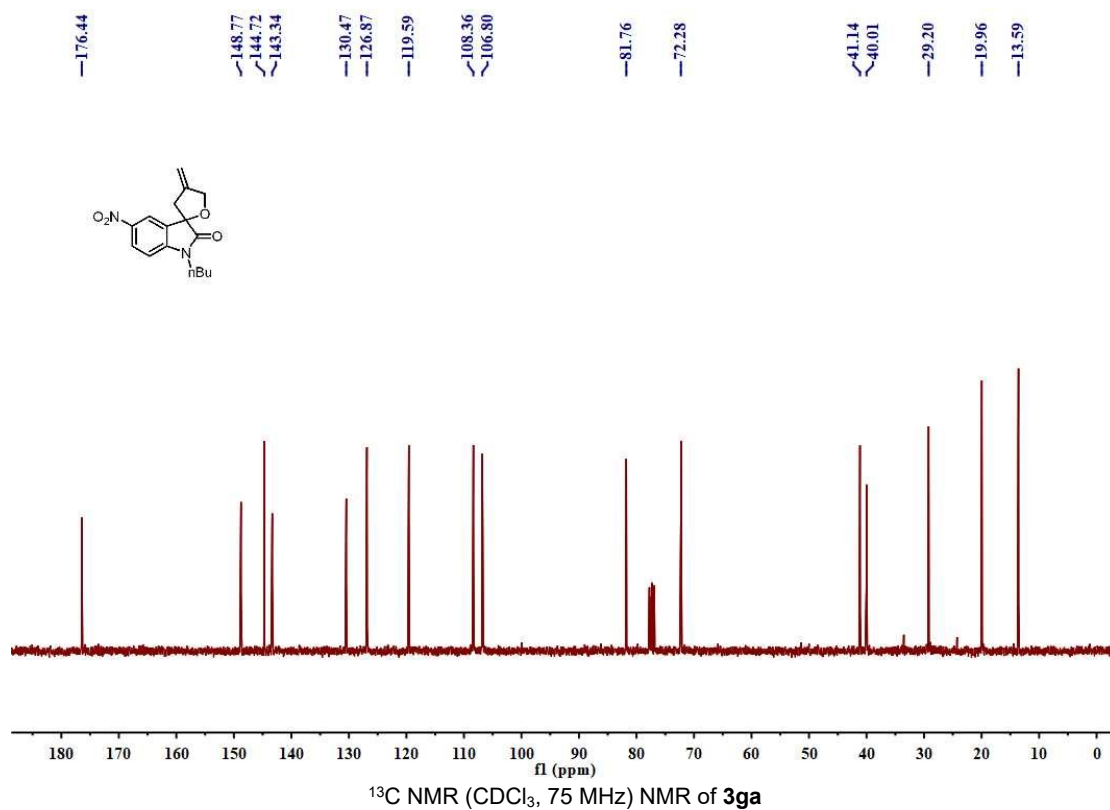



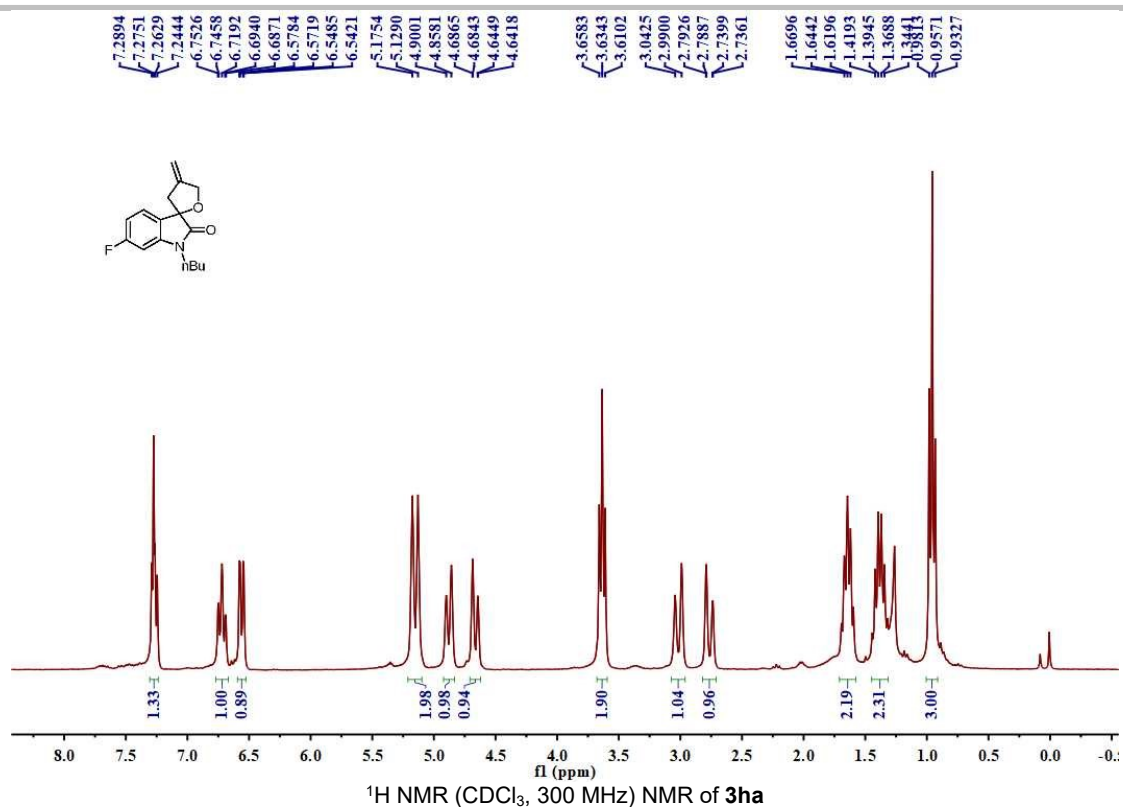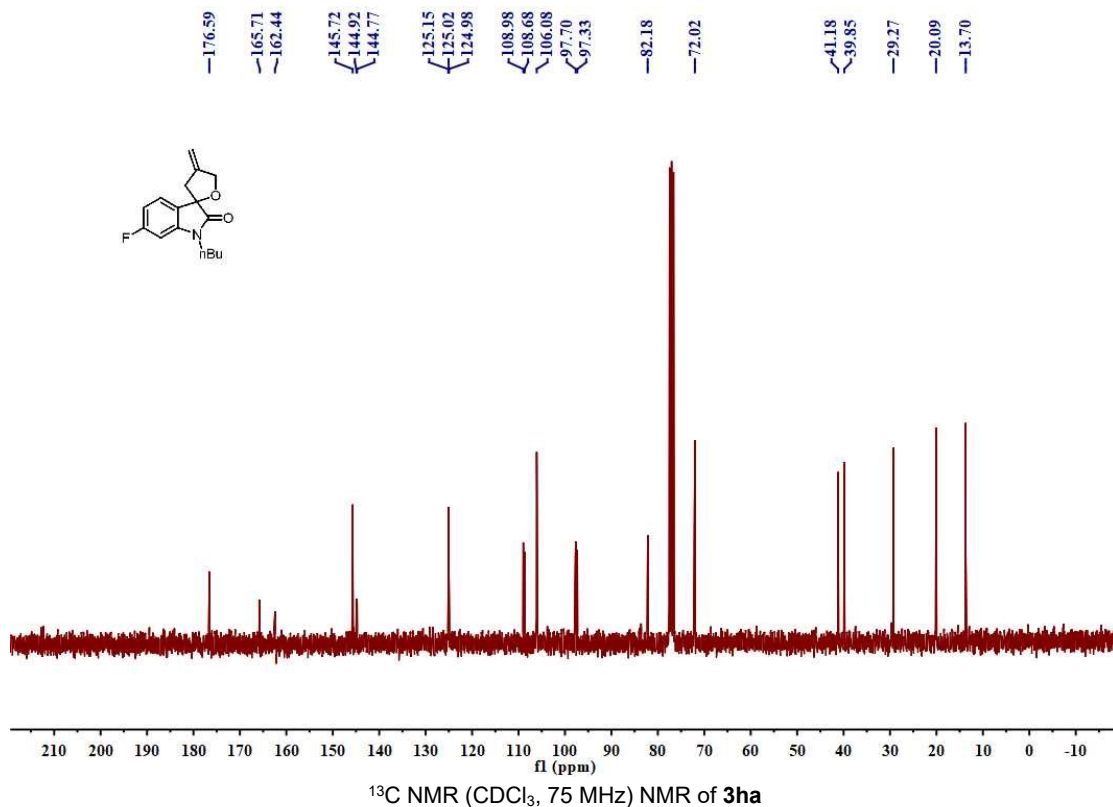

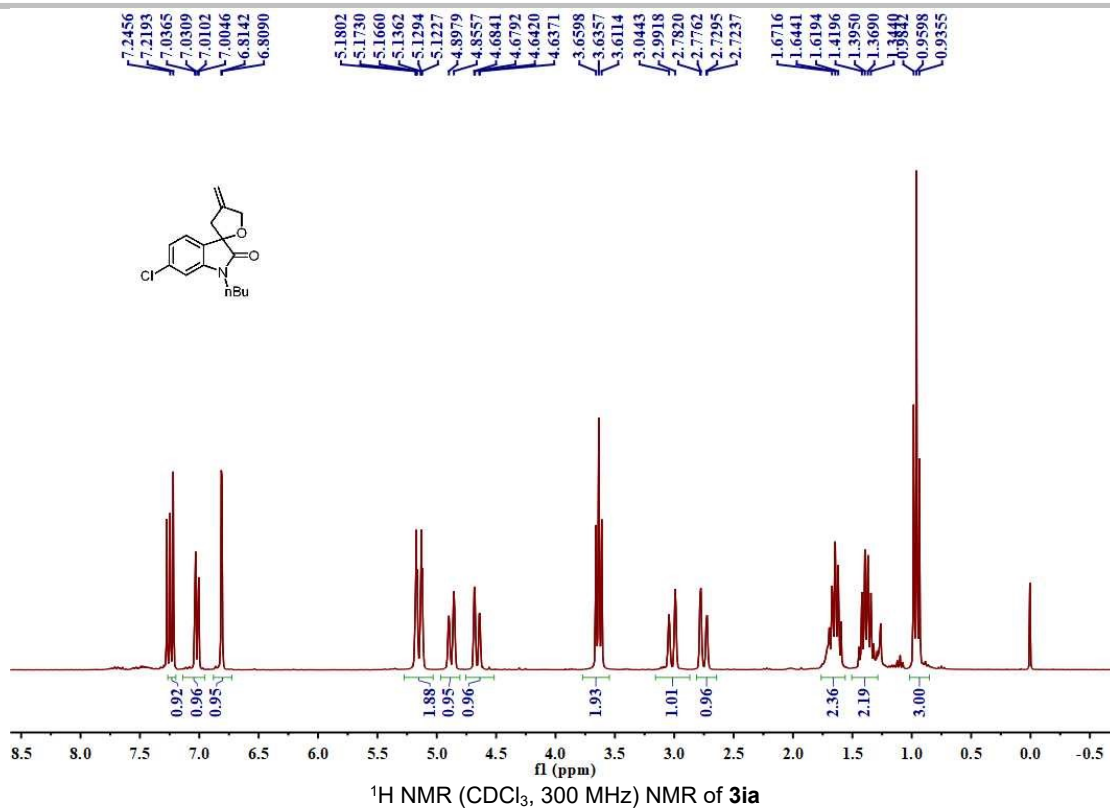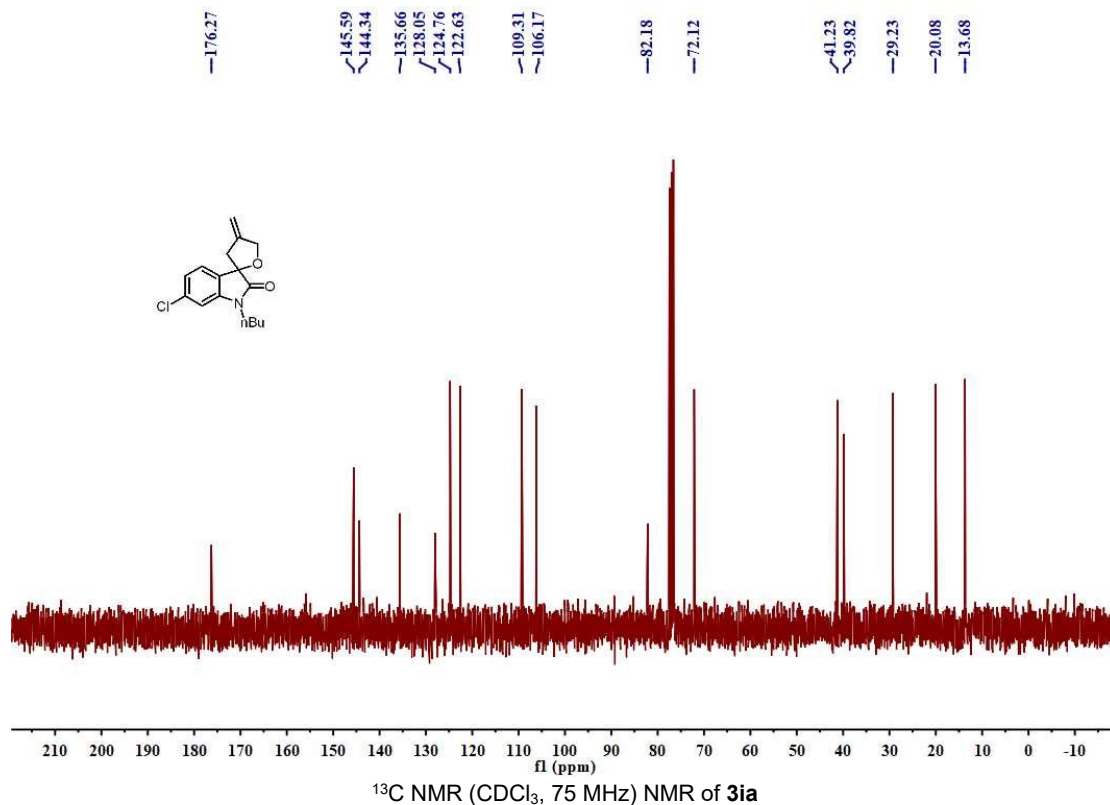

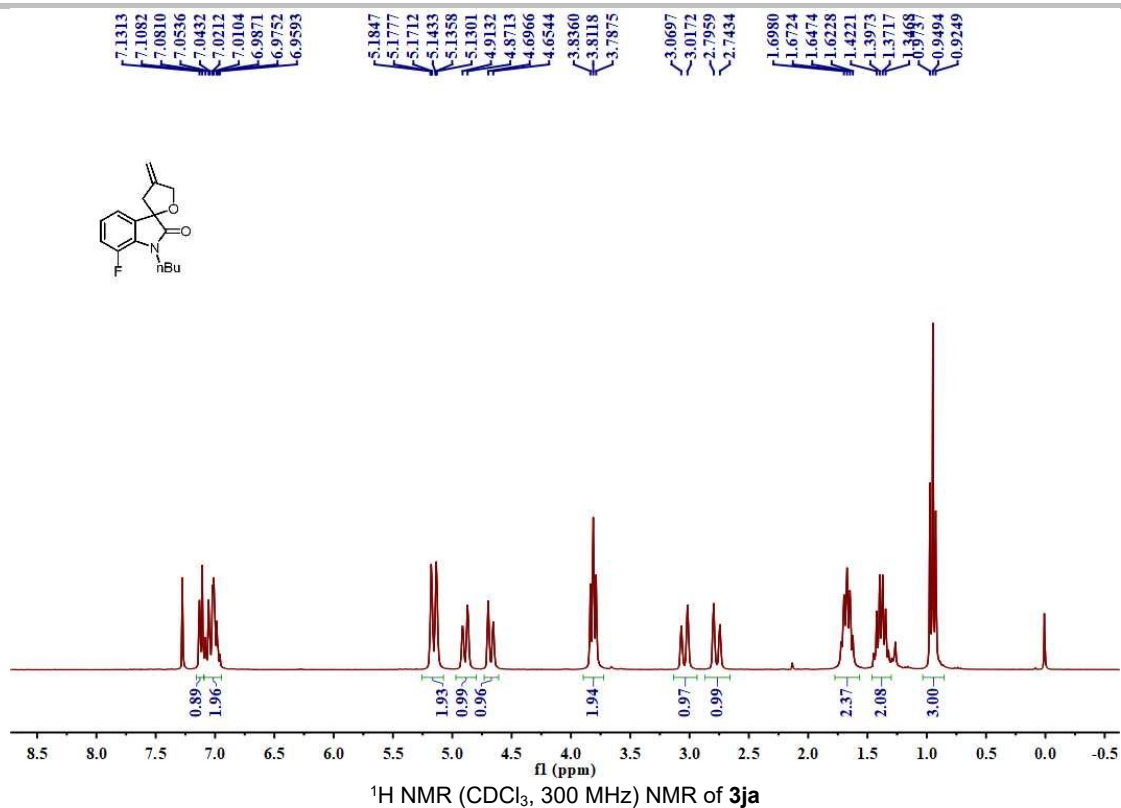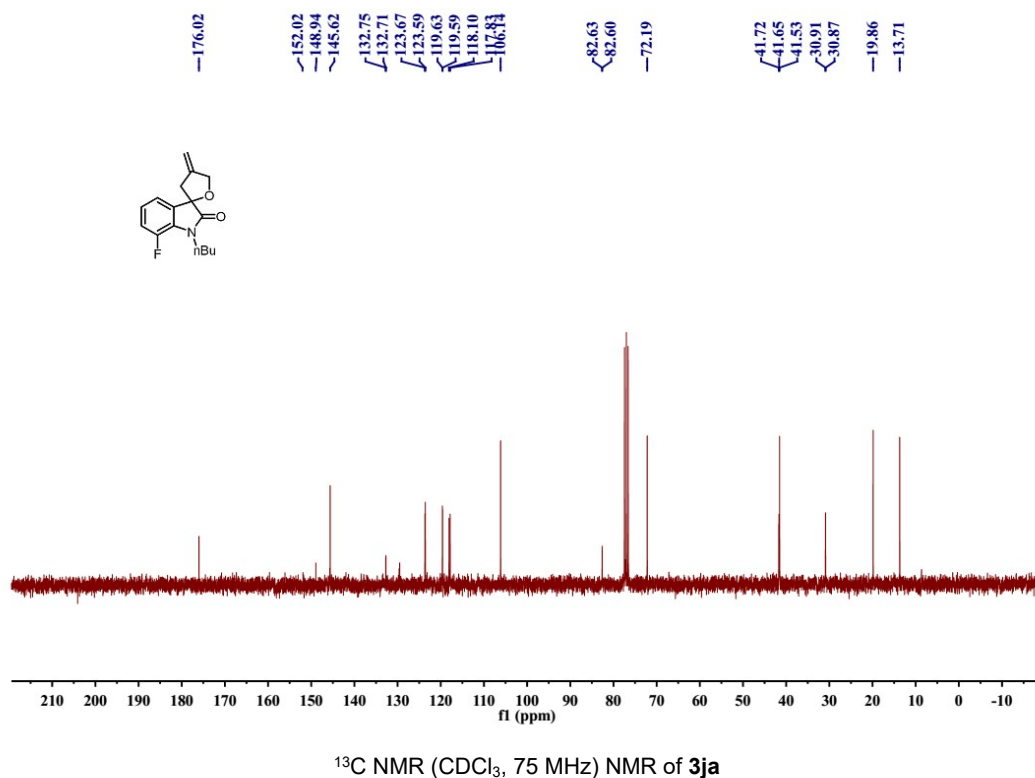

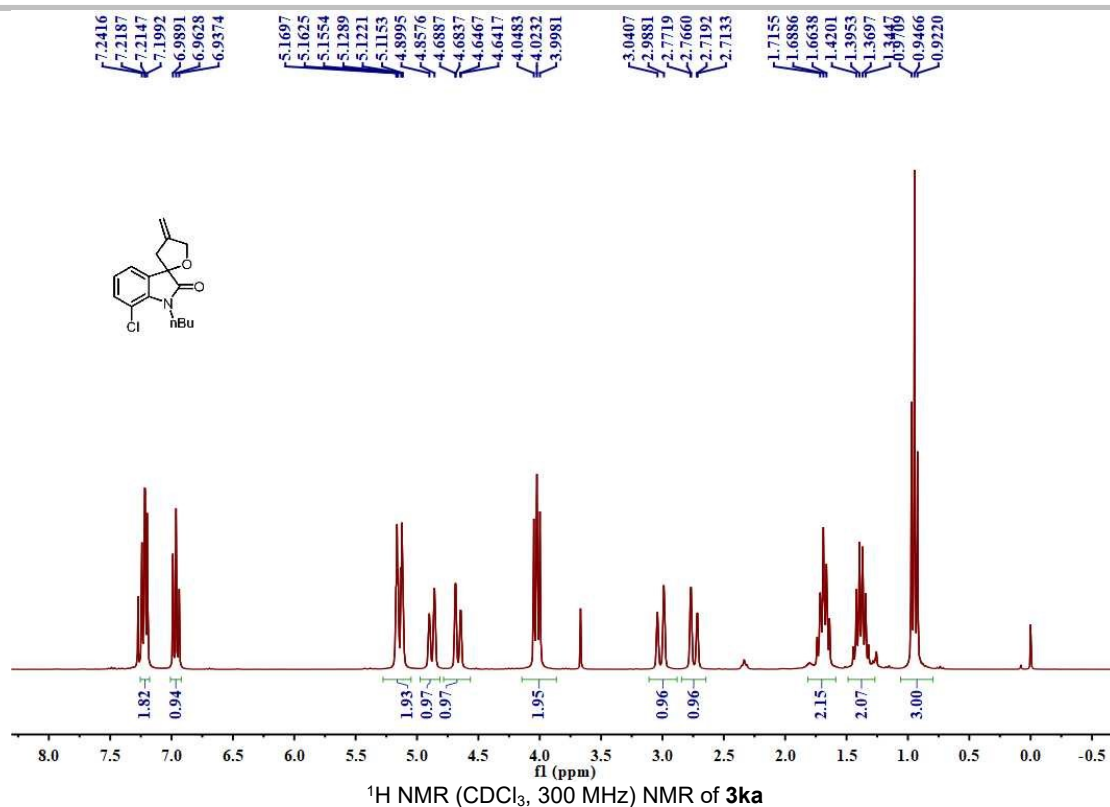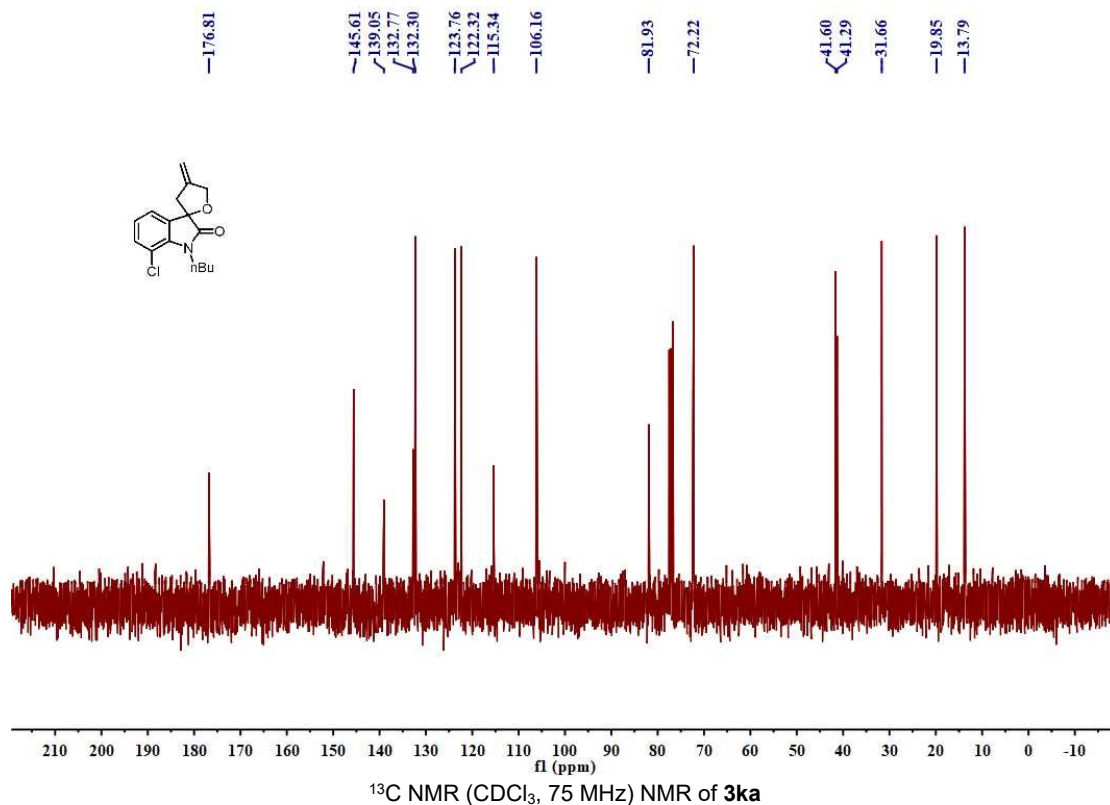

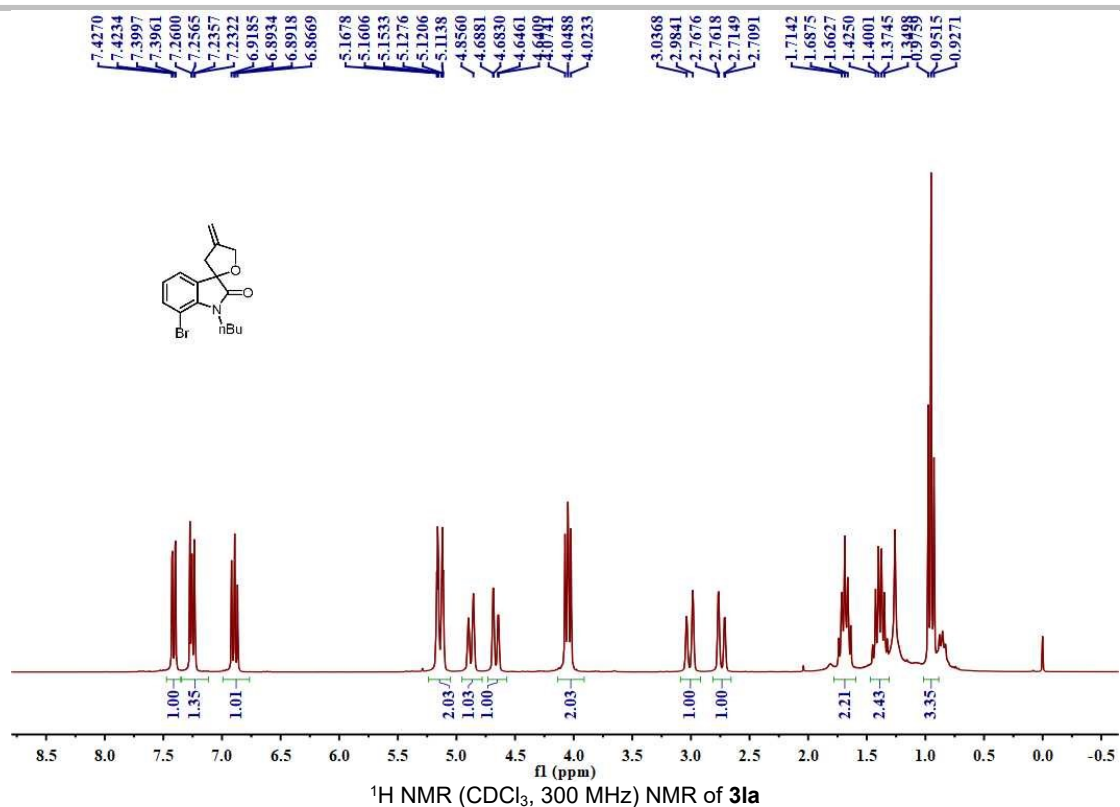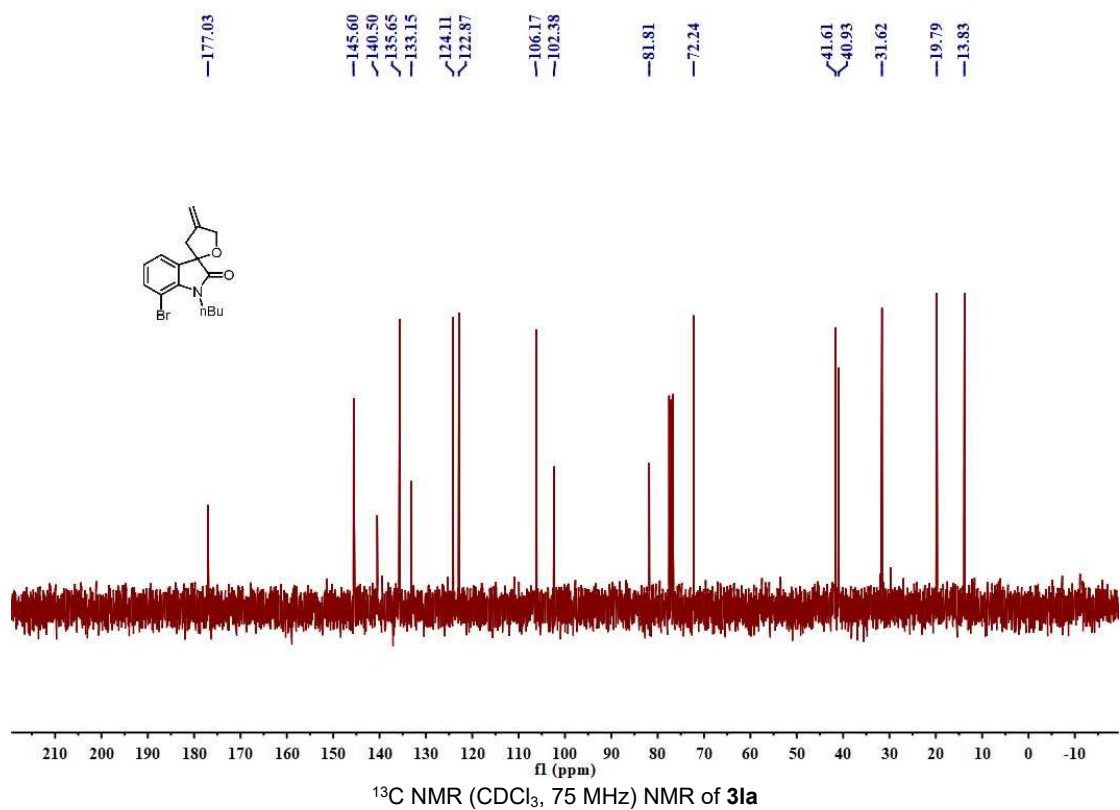

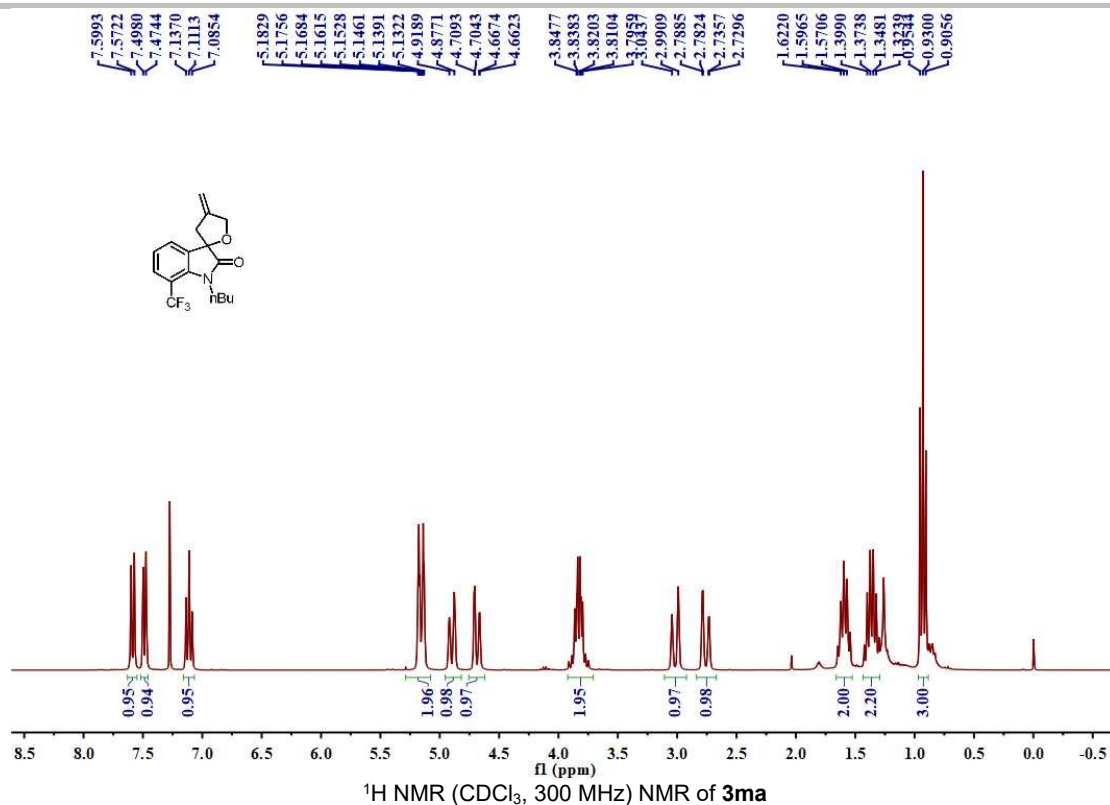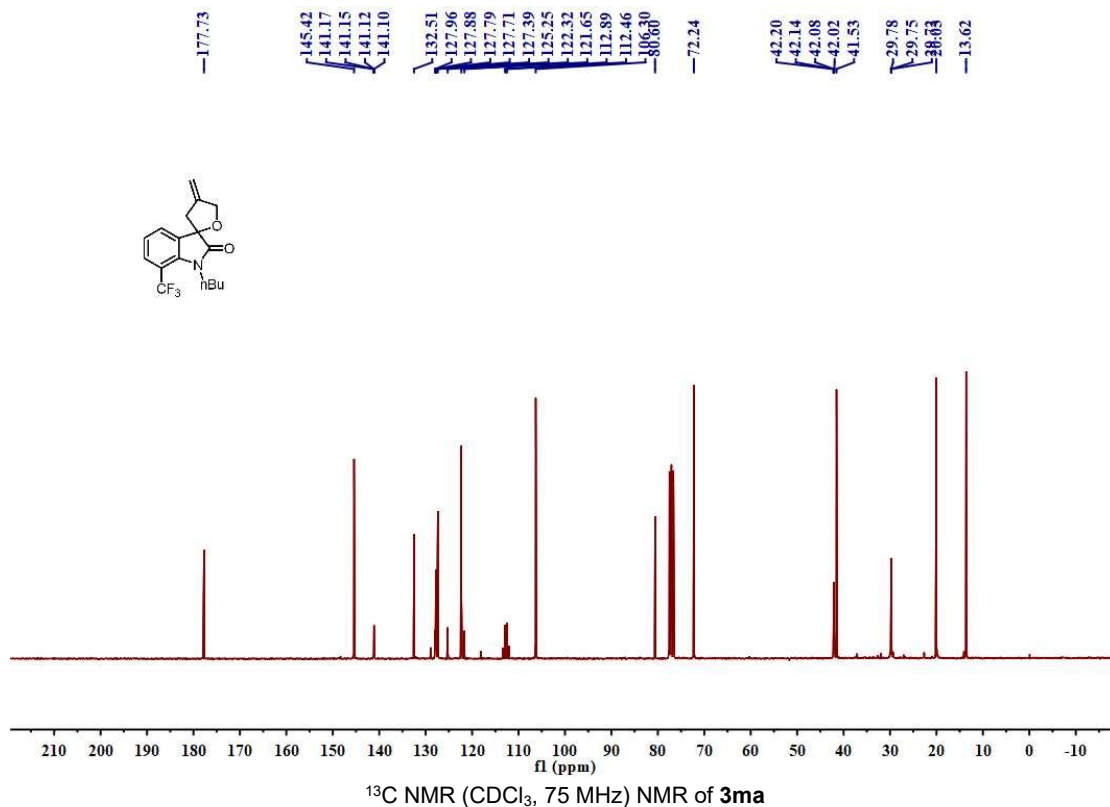

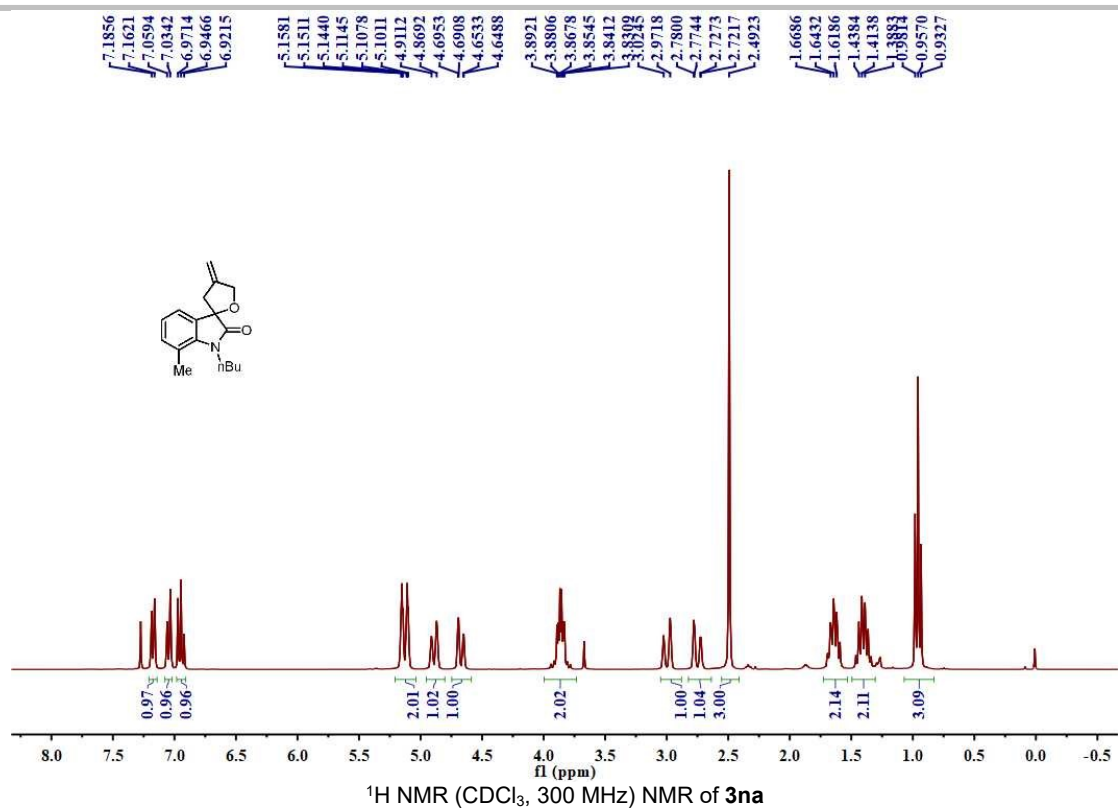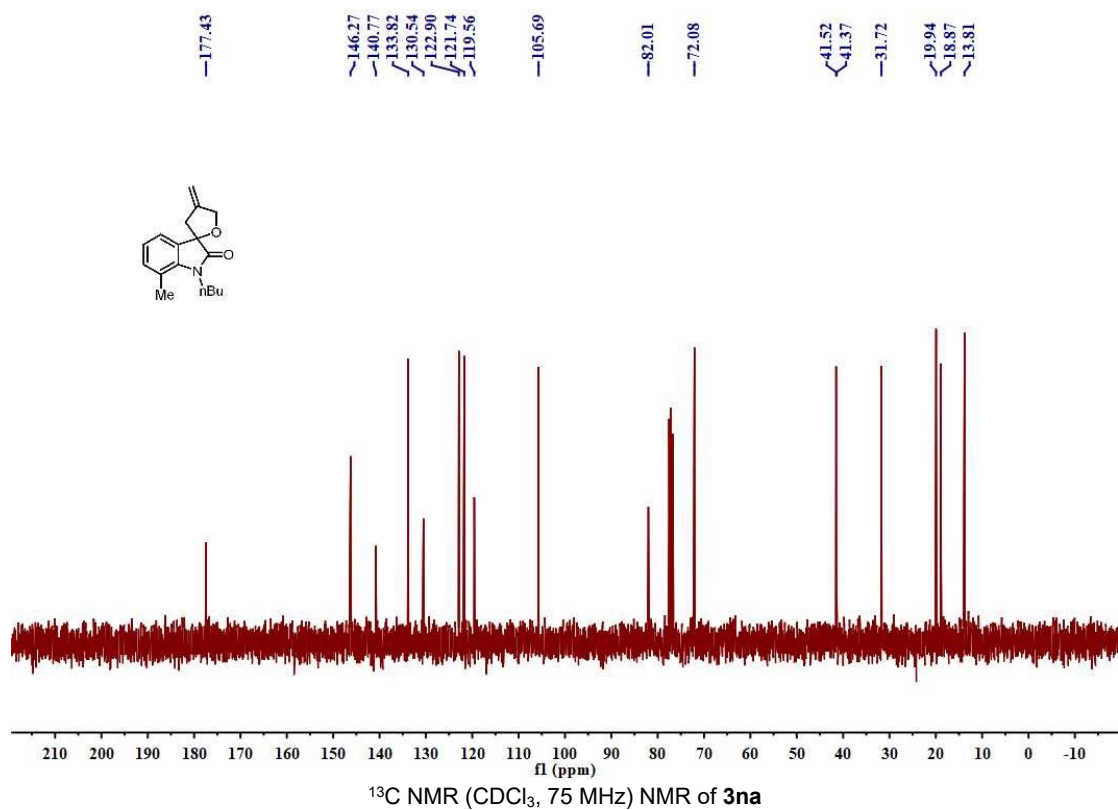

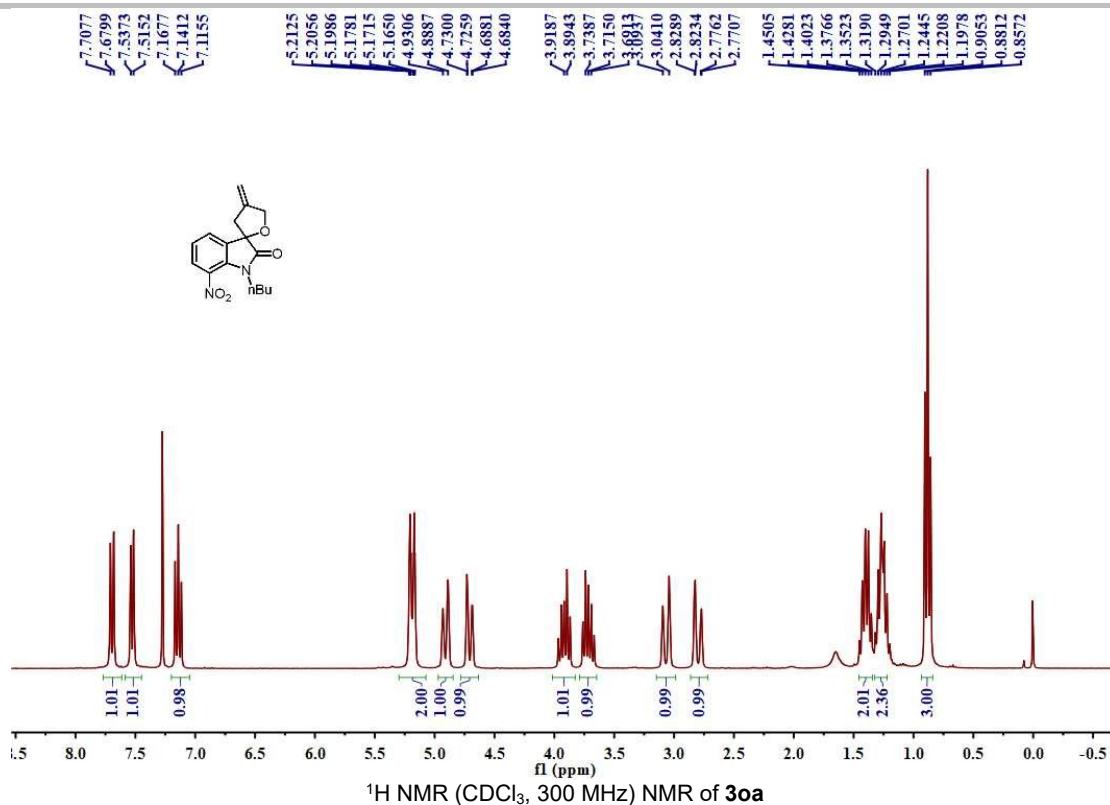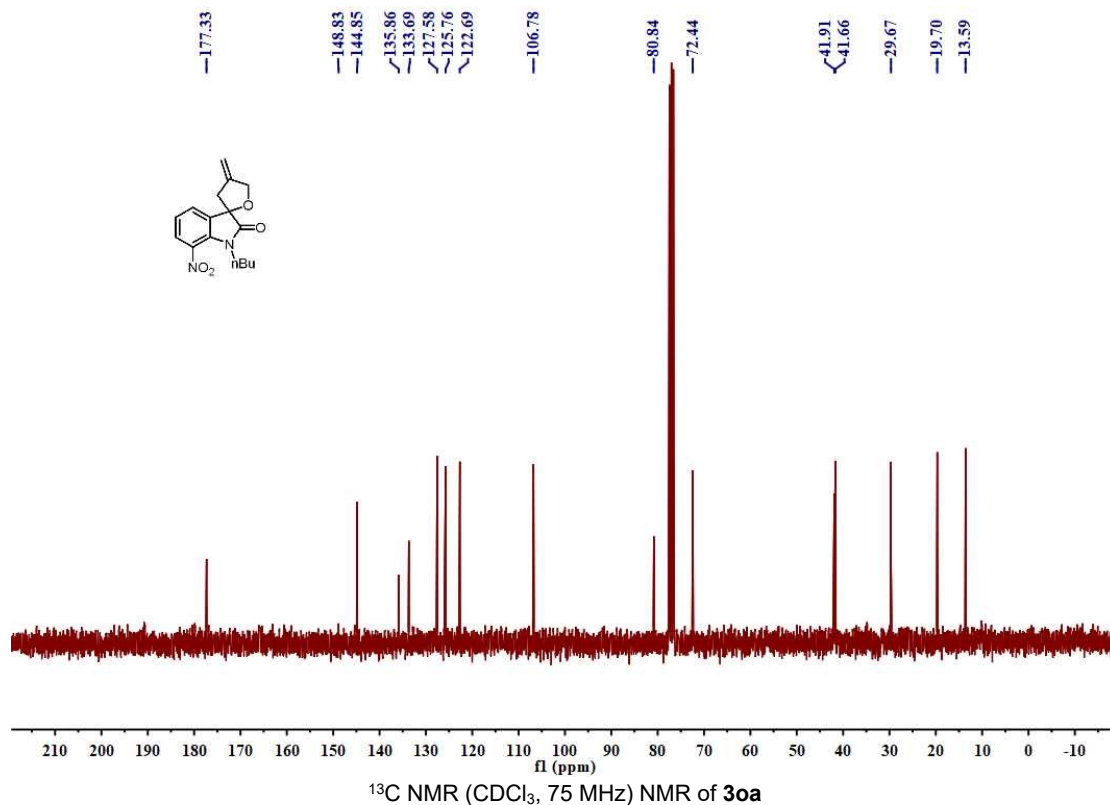



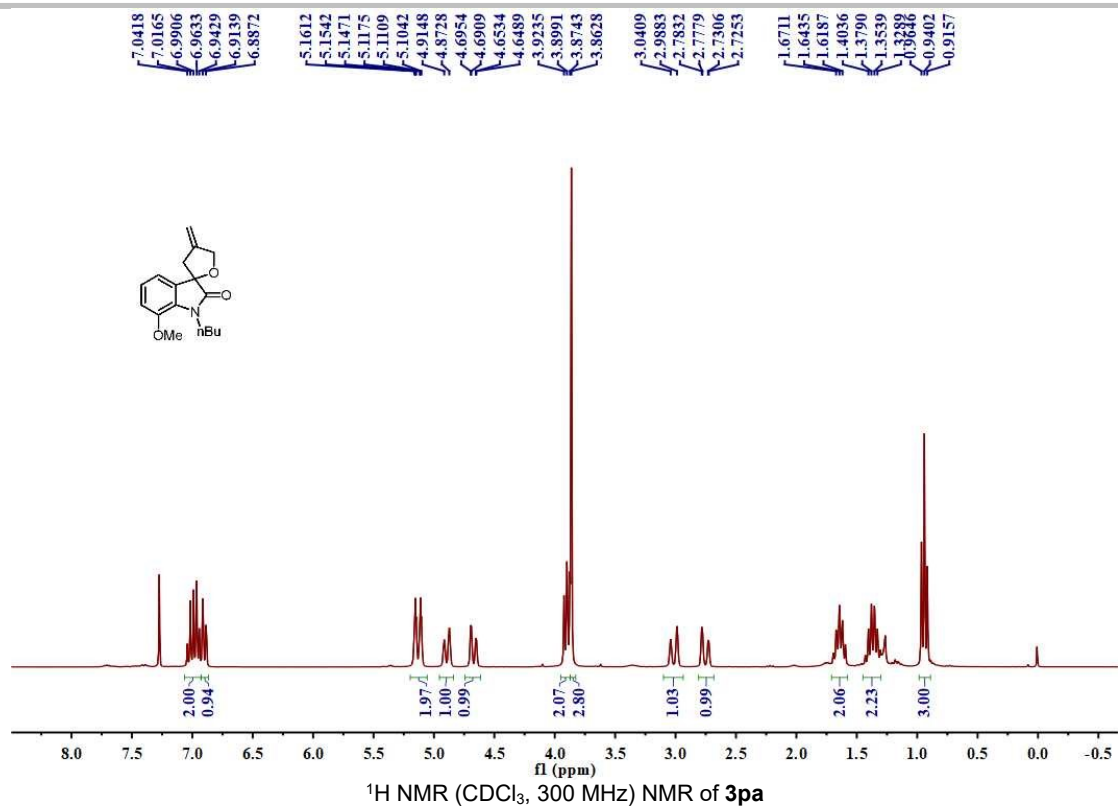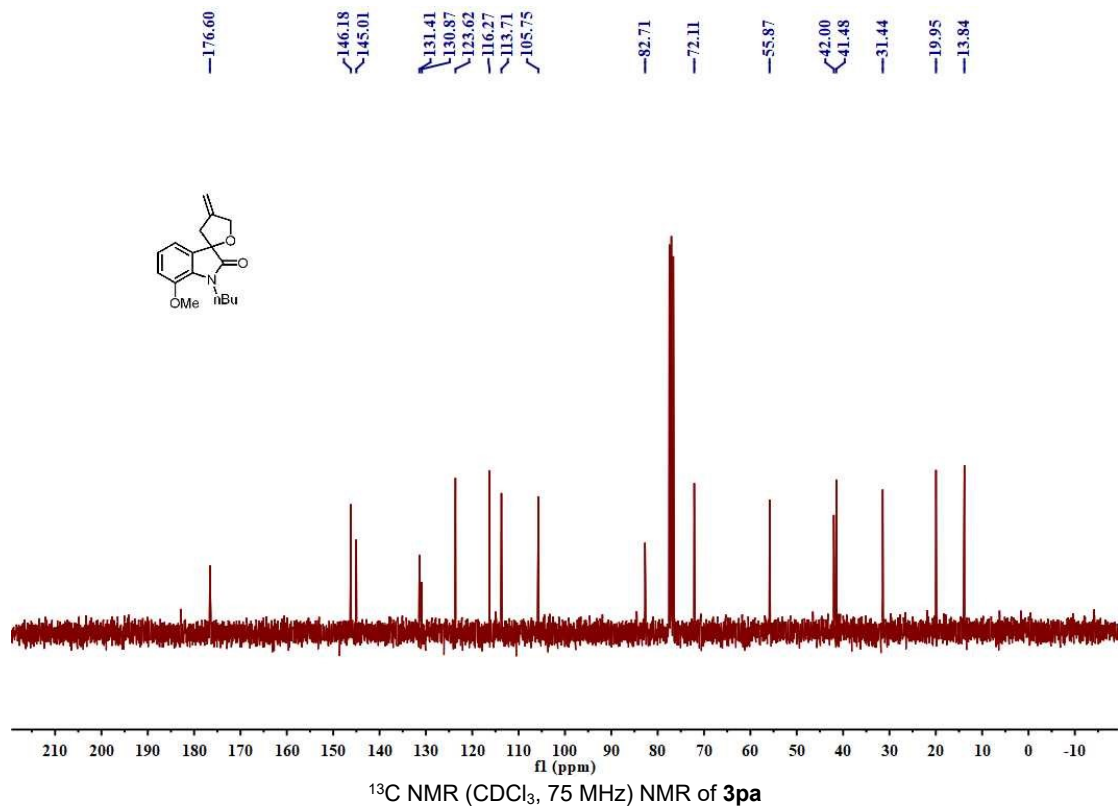

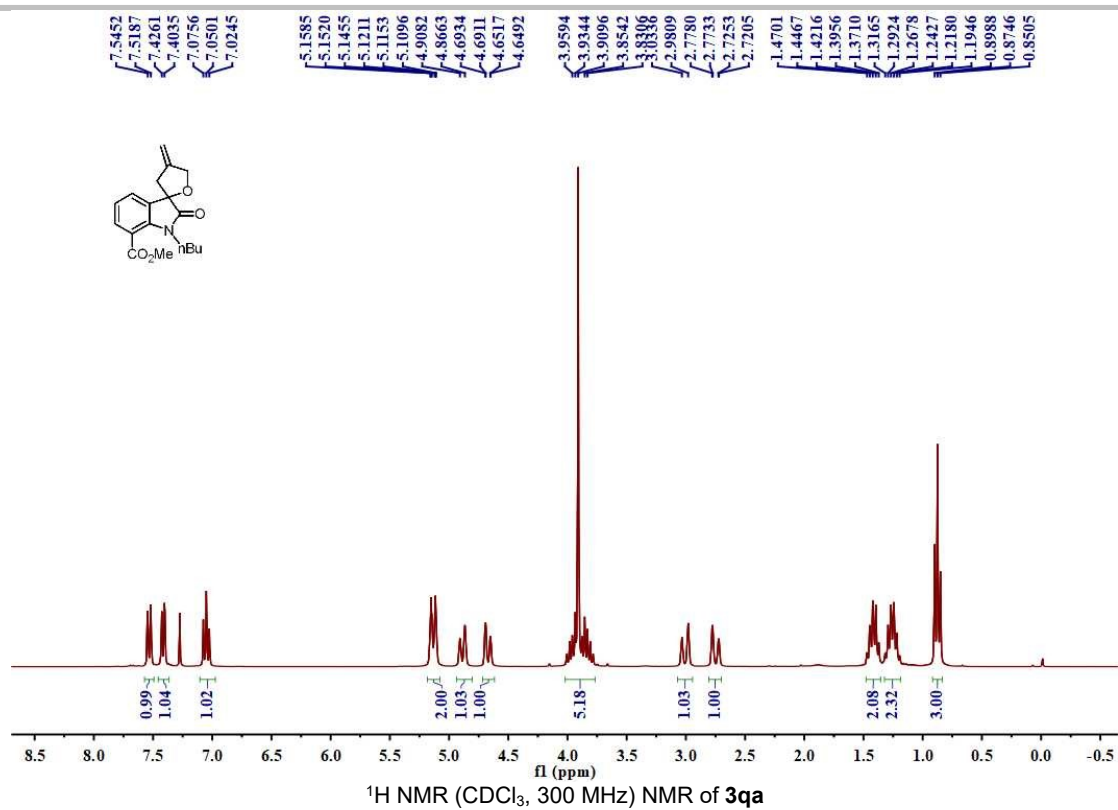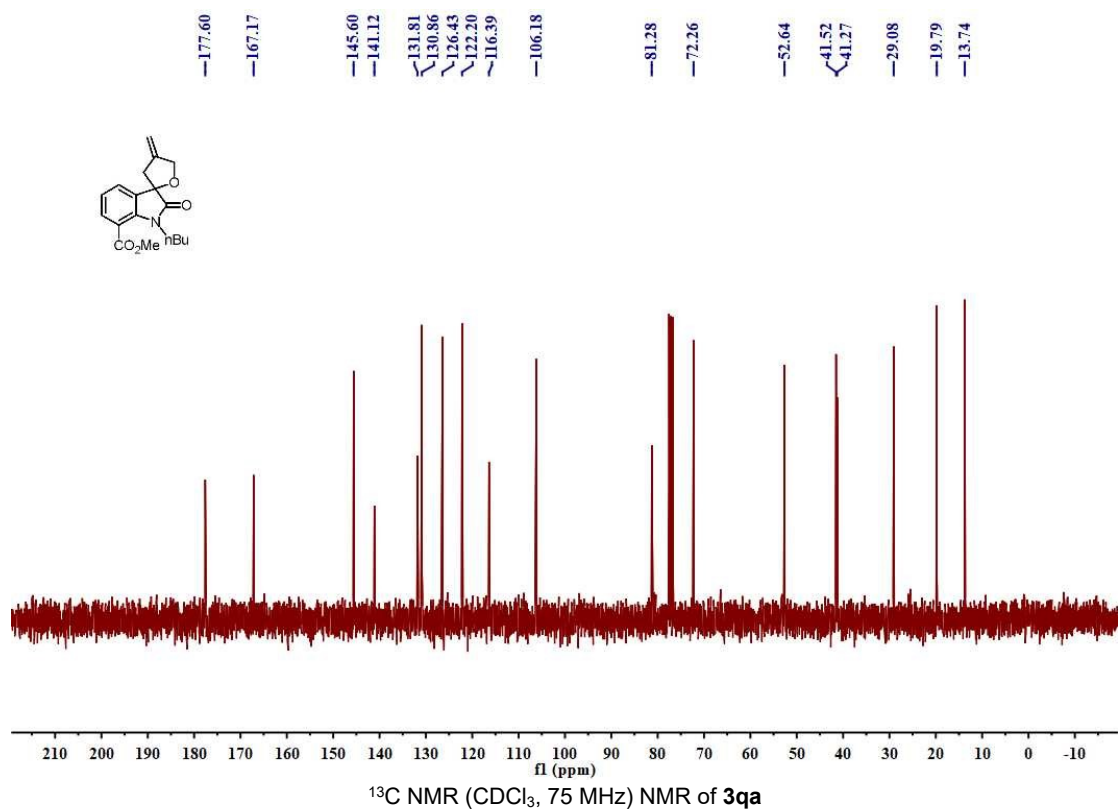

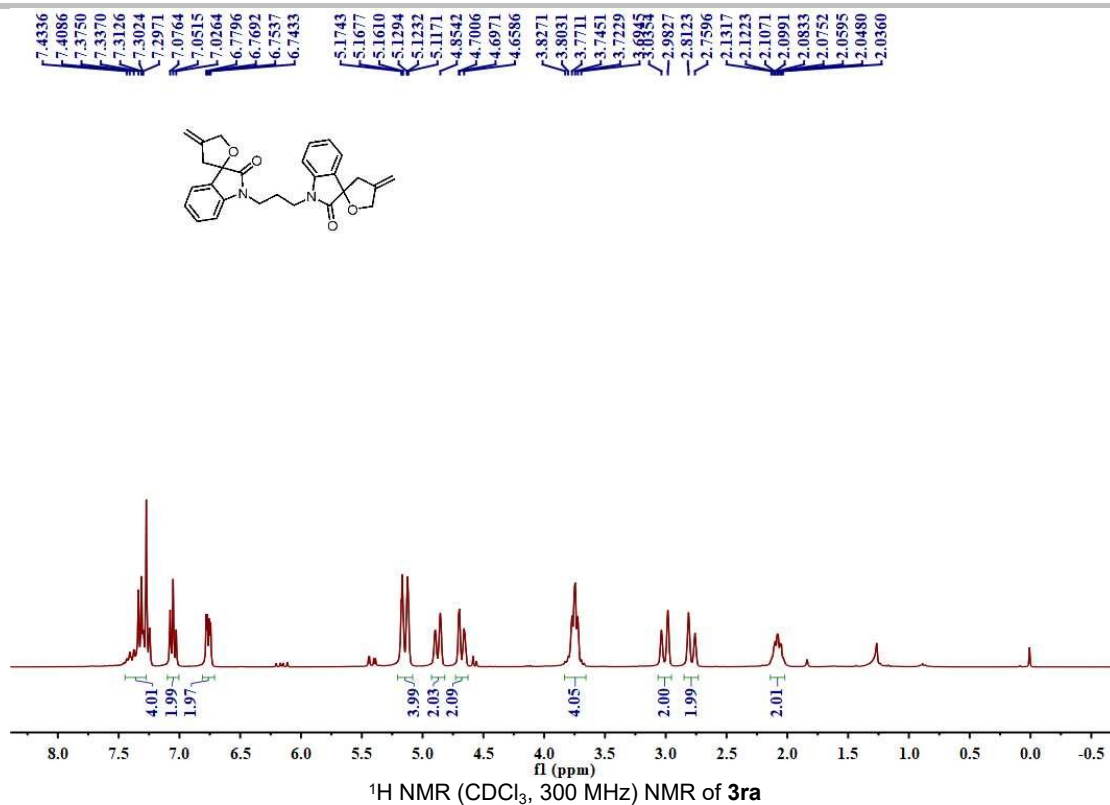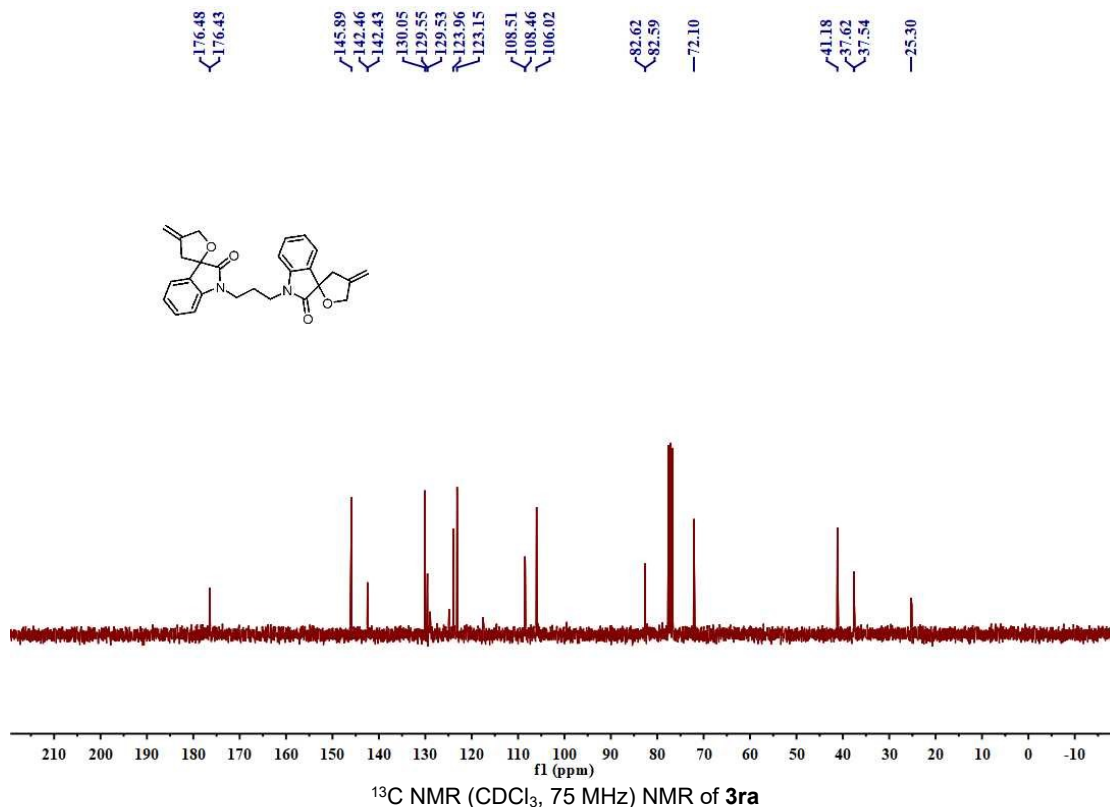

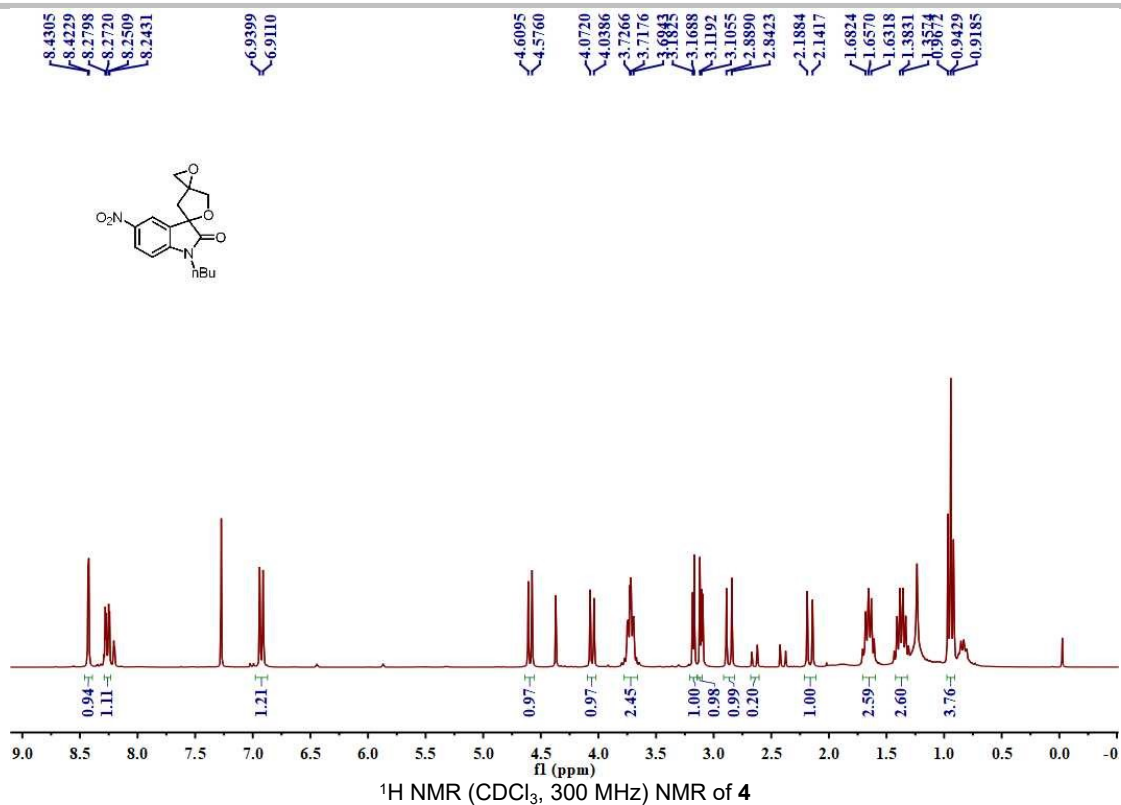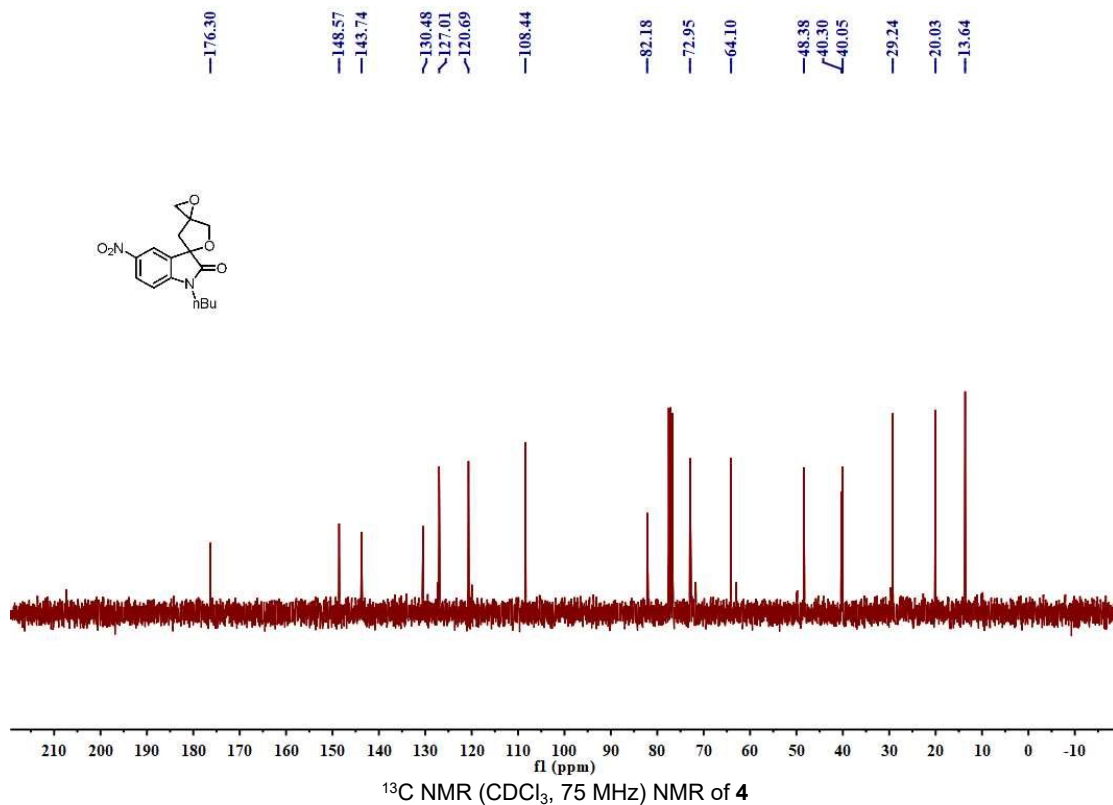

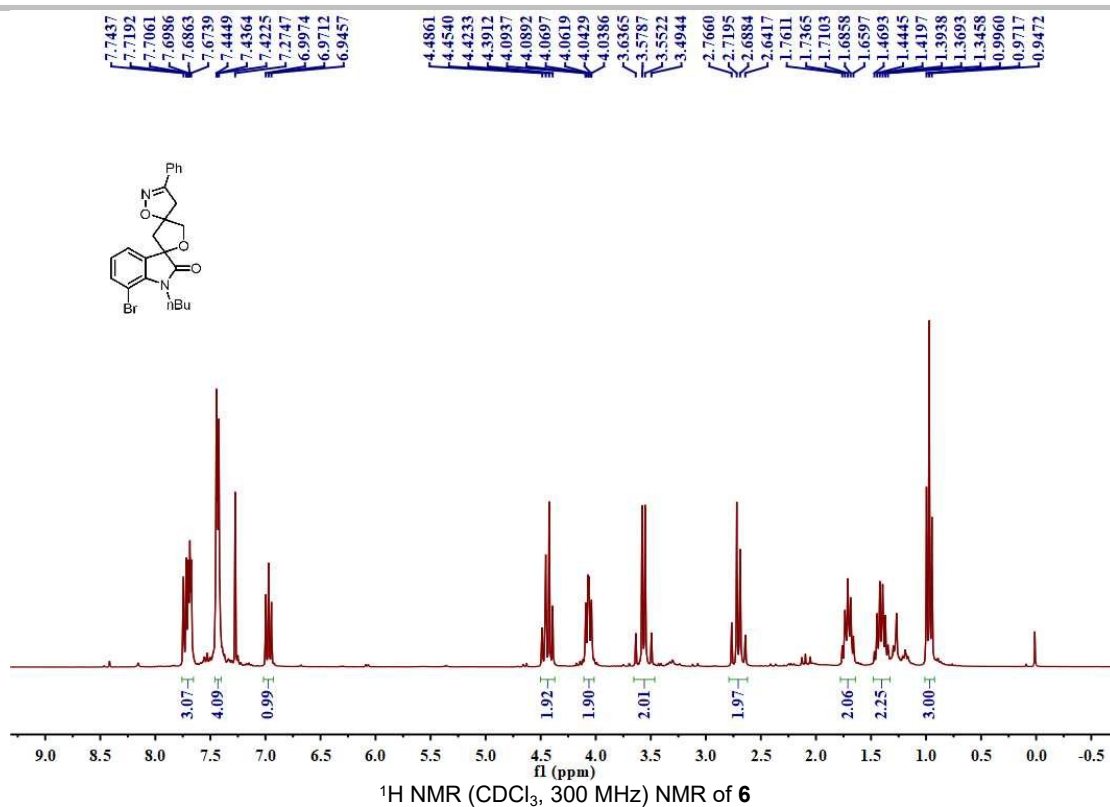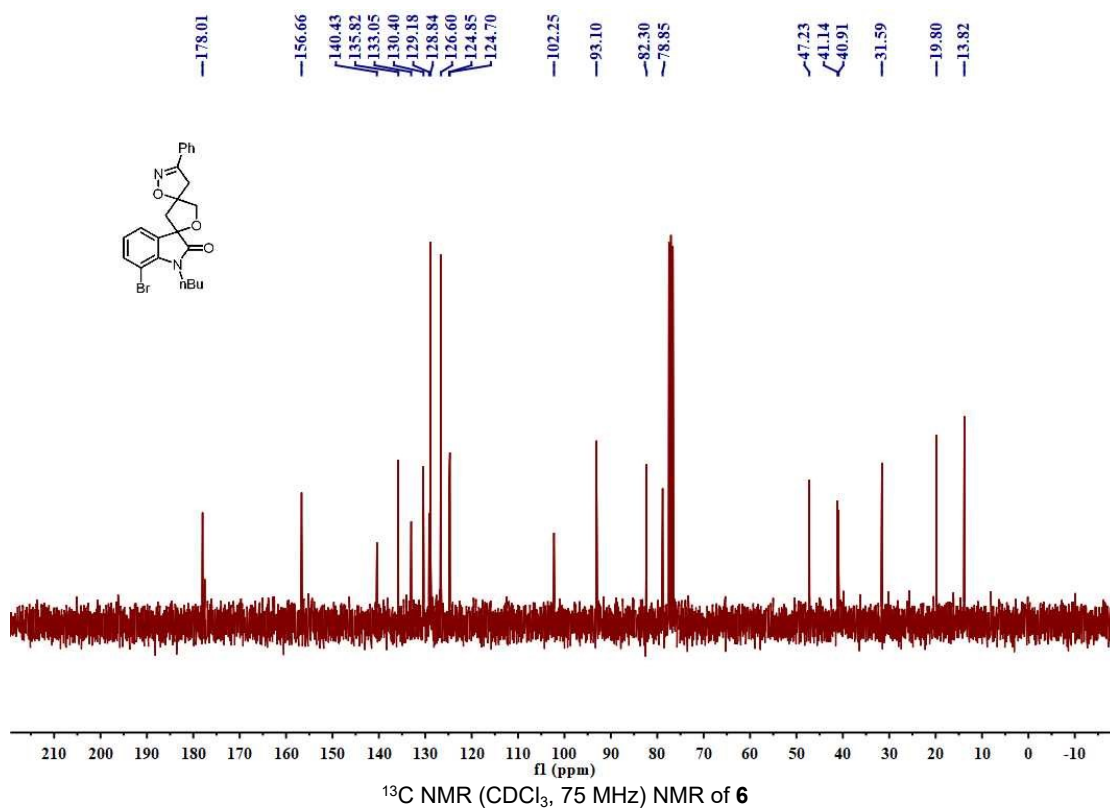

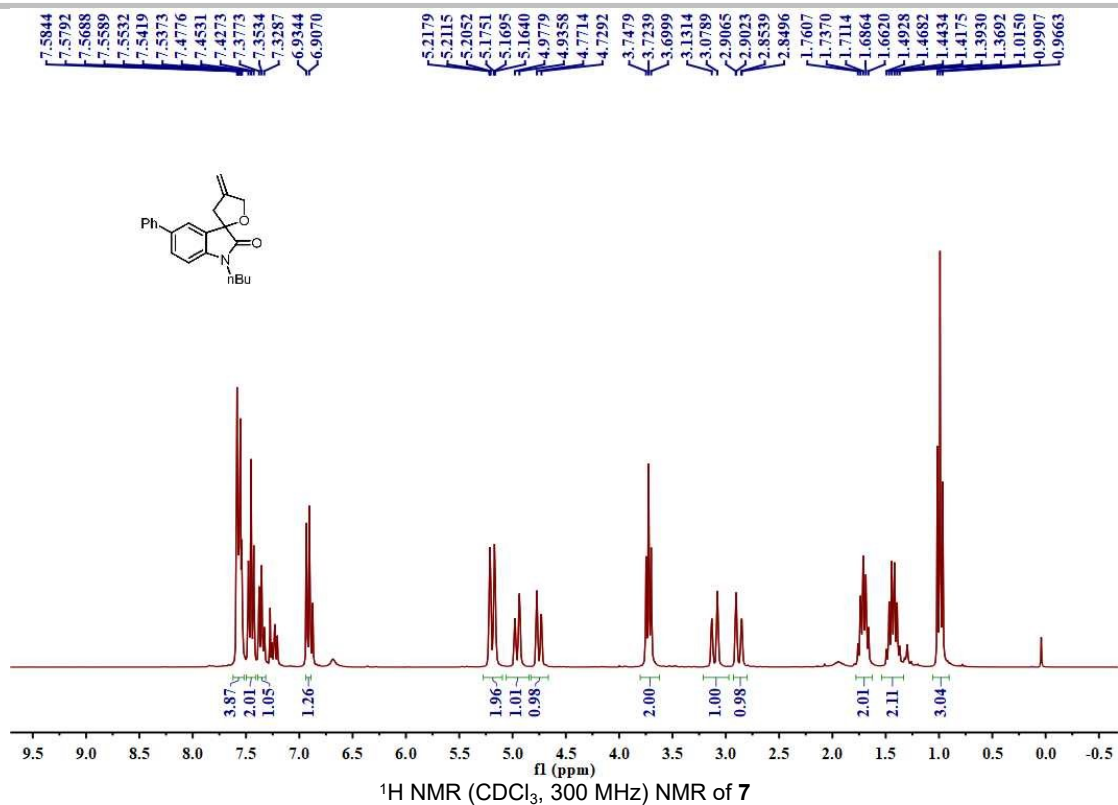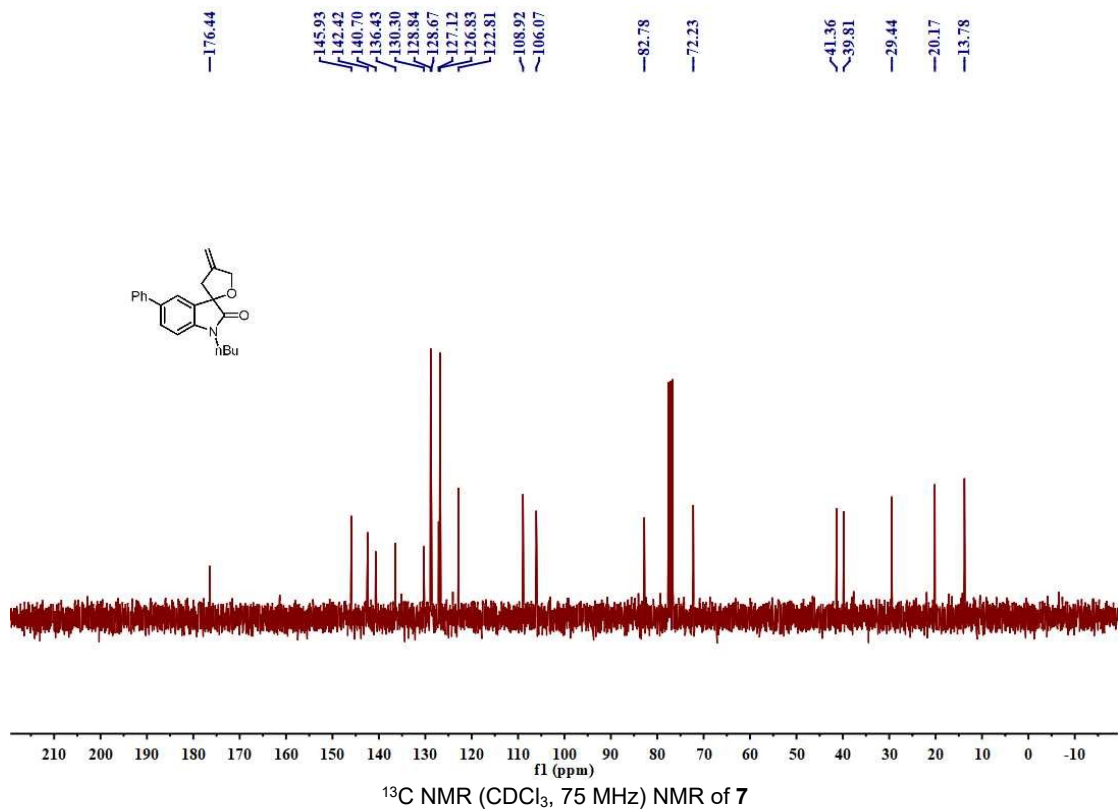

Supplement: d2qo00231k2.pdf [file d2qo00231k2.pdf]
